# Supplementary material for: Catalyst-free three-component synthesis of highly functionalized 2,3-dihydropyrroles
Source: Royal Society of Chemistry journal article supplement (doi:10.1039/c8gc00987b), 2018-01-01

## Supporting Information

### Catalyst-Free Three-Component Synthesis of Highly Functionalized 2,3-Dihydropyrroles

Dong Wang, Linna Li, Hairong Feng, Hua Sun, Fabrice Almeida-Veloso, Marine Charavin, Peng Yu, and Laurent Désaubry\*

### Table of Contents

|                                                       |       |
|-------------------------------------------------------|-------|
| 1. General Experimental.....                          | SI-2  |
| 2. Preparation Procedure for 3, 4, 5 and 6 .....      | SI-3  |
| 3. Mechanism studies.....                             | SI-24 |
| 4. ORTEP Drawing for 4o .....                         | SI-27 |
| 5. NOESY for 4a.....                                  | SI-27 |
| 6. Kinetics of $\alpha$ -Glucosidase Inhibition ..... | SI-28 |
| 7. Reference.....                                     | SI-29 |
| 8. Spectra Data.....                                  | SI-29 |

## 1. General Experimental

The preparation experiments were performed under an argon atmosphere in oven dried glassware. Solvents used as reaction media were distilled immediately before use: THF and ether were distilled from Na/benzophenone ketyl, dichloromethane was distilled from calcium hydride, DMF was obtained from vacuum distillation, EtOH was distilled from Mg and I<sub>2</sub>. All reagents were purchased at the highest commercial quality and used without further purification. Reactions were monitored by thin layer chromatography (TLC) using ultra violet light (UV) as the visualizing agent. Nuclear magnetic resonance spectra (NMR) were recorded on Bruker AV-400 instruments and were calibrated using residual undeuterated solvent as an internal reference (<sup>1</sup>H NMR: CHCl<sub>3</sub> 7.26 ppm, MeOH 3.31 ppm). The following abbreviations were used to indicate multiplicities: s = singlet, d = doublet, t = triplet, q = quartet, qui = quintet, sxt = sextet, dd = doublet of doublets, dt = doublet of triplets, ddd = doublet of doublet of doublets, ddt = doublet of doublet of triplets, m = multiplet).

### General Procedure A: Preparation of pyruvic amides (3)

To a solution of pyruvic acid (1.1 equiv) in anhydrous DMF (0.3 M) was added HATU (1.3 equiv) at 0°C. After stirring for 10 minutes, amine (1.0 equiv) and DIEA (3.0 equiv) were slowly added. The resulting reaction mixture was warmed to r.t. and stirred for several hours until the reaction is complete as indicated by TLC. The reaction mixture was diluted with EtOAc and water, the separated organic layer was washed sequentially with 5% citric acid solution, half-saturated aqueous NaCl for five times, dried over Na<sub>2</sub>SO<sub>4</sub>, filtered and concentrated under reduced pressure to afford the crude product, which was purified by column chromatography on silica gel (PE/EA 100:1).

### General Procedure B: Preparation of 2,3-dihydropyrroles (4)

A solution of amine (1.0 equiv), aldehyde (2.0 equiv), pyruvic amide (2.0 equiv) and acetic acid (V<sub>EtOH</sub> : V<sub>AcOH</sub> = 12:1) in anhydrous EtOH (amine concentration: 0.025 mol/L) was stirred under reflux for 8 h. After cooled down to r.t., ethanol was removed under vacuum,

and the residue was diluted with EtOAc and water. After separation, the aqueous phase was extracted two more times with EtOAc. The combined organic phases were successively washed with saturated aqueous KHSO<sub>4</sub>, saturated aqueous NaHCO<sub>3</sub>, and brine, dried over MgSO<sub>4</sub>, concentrated *in vacuo* and chromatographed gradiently on silica gel with PE/EA (5:1~3:1) to give the dihydropyrrole products.

## 2. Preparation Procedure for 3, 4, 5 and 6

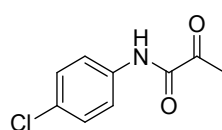

***N*-(4-Chlorophenyl)-2-oxopropanamide (3a)**

**3a**

Using 4-chloroaniline (1.0 g, 7.8 mmol), in accordance with General Procedure A, the title compound **3a** was obtained (810 mg, 52% yield) as a white solid. <sup>1</sup>H NMR (400 MHz, CDCl<sub>3</sub>) δ 8.73 (s, 1H), 7.60 (d, *J* = 8.0 Hz, 2H), 7.34 (d, *J* = 8.0 Hz, 2H), 2.57 (s, 3H). <sup>13</sup>C NMR (100 MHz, CDCl<sub>3</sub>) δ 197.1, 157.6, 135.0, 130.6, 129.5, 121.1, 24.2. HRMS (ESI-TOF) *m/z* calcd. for C<sub>9</sub>H<sub>7</sub>NO<sub>2</sub>Cl<sup>+</sup> [M-H]<sup>+</sup>: 196.0171, found 196.0170.

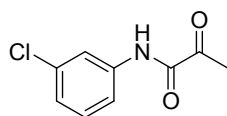

***N*-(3-Chlorophenyl)-2-oxopropanamide (3b)**

**3b**

Using 3-chloroaniline (1.0 g, 7.8 mmol), in accordance with General Procedure A, the title compound **3b** was obtained (900 mg, 59% yield) as a white solid. <sup>1</sup>H NMR (400 MHz, CDCl<sub>3</sub>) δ 8.73 (s, 1H), 7.78 (t, *J* = 2.0 Hz, 1H), 7.46 (dd, *J* = 1.6, 8.0 Hz, 1H), 7.29 (t, *J* = 8.0 Hz, 1H), 7.16 (d, *J* = 8.0 Hz, 1H), 2.57 (s, 3H). <sup>13</sup>C NMR (100 MHz, CDCl<sub>3</sub>) δ 197.0, 157.7, 137.5, 135.1, 130.4, 125.5, 120.0, 117.9, 24.1. HRMS (ESI-TOF) *m/z* calcd. for C<sub>9</sub>H<sub>7</sub>NO<sub>2</sub>Cl<sup>+</sup> [M-H]<sup>+</sup>: 196.0171, found 196.0172.

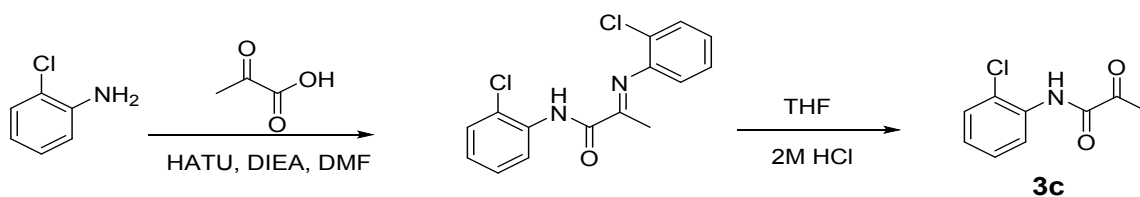

**3c**

### ***N*-(2-Chlorophenyl)-2-oxopropanamide (3c)**

To a solution of pyruvic acid (2.8 g, 31.4 mmol) in anhydrous DMF (30 ml) was added HBTU (11.9 g, 31.4 mmol) at 0 °C. After stirring for 10 minutes, 2-chloroaniline (2.0 g, 15.7 mmol) and DIEA (6.1 g, 47.1 mmol) were slowly added. The resulting reaction mixture was warmed to r.t. and stirred for several hours until the reaction is complete as indicated by TLC. The reaction mixture was diluted with EtOAc and water, the separated organic layer was washed sequentially with 5% citric acid solution, half-saturated aqueous NaCl for five times, dried over Na<sub>2</sub>SO<sub>4</sub>, filtered and concentrated under reduced pressure to afford the crude product, which was purified by column chromatography on silica gel (PE/EA 100:1) to produce the imine intermediate (~ 600 mg).

A solution of the intermediate (500 mg) in THF (12 ml) and 2 M HCl (5 ml) was stirred under reflux for 3 h. The reaction mixture was diluted with EtOAc and water, the separated organic layer was washed with brine, dried over Na<sub>2</sub>SO<sub>4</sub>, filtered and concentrated under reduced pressure to afford **3c** (316 mg, 98% yield) as a pale yellow solid. <sup>1</sup>H NMR (400 MHz, CDCl<sub>3</sub>) δ 9.38 (s, 1H), 8.45 (d, *J* = 8.4 Hz, 1H), 7.41 (d, *J* = 8.0 Hz, 1H), 7.32 (t, *J* = 8.0 Hz, 1H), 7.11 (t, *J* = 8.0 Hz, 1H), 2.58 (s, 3H). <sup>13</sup>C NMR (100 MHz, CDCl<sub>3</sub>) δ 196.7, 157.7, 133.3, 129.5, 128.0, 125.8, 123.9, 121.1, 24.1. HRMS (ESI-TOF) *m/z* calcd. for C<sub>9</sub>H<sub>7</sub>NO<sub>2</sub>Cl<sup>-</sup> [M-H]<sup>-</sup>: 196.0171, found 196.0166.

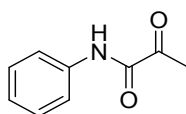

### **2-Oxo-*N*-phenylpropanamide (3d)**

Using aniline (3.0 g, 7.8 mmol), in accordance with General Procedure A, the title compound **3d** was obtained (3.0 g, 57% yield) as a white solid. <sup>1</sup>H NMR (400 MHz, CDCl<sub>3</sub>) δ 8.72 (s, 1H), 7.64 (d, *J* = 7.6 Hz, 2H), 7.38 (t, *J* = 8.0 Hz, 2H), 7.18 (t, *J* = 7.6 Hz, 1H), 2.57 (s, 3H). <sup>13</sup>C NMR (100 MHz, CDCl<sub>3</sub>) δ 197.5, 157.7, 136.4, 129.4, 125.4, 119.8, 24.2. HRMS (ESI-TOF) *m/z* calcd. for C<sub>9</sub>H<sub>10</sub>NO<sub>2</sub> [M+H]<sup>+</sup>: 164.0706, found 164.0712.

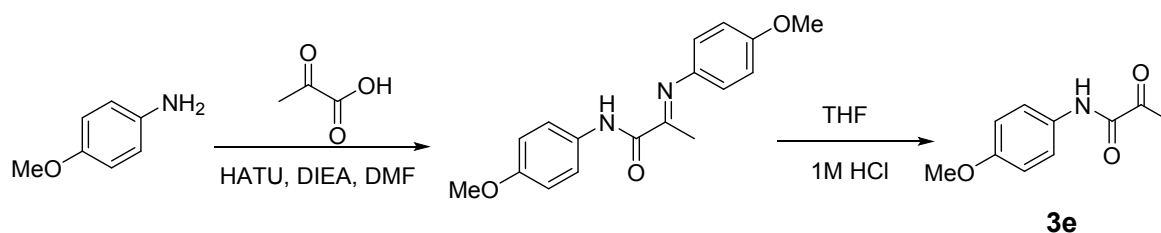

### ***N*-(4-Methoxyphenyl)-2-oxopropanamide (3e)**

To a solution of pyruvic acid (1.2 g, 13.6 mmol) in anhydrous DMF (20 ml) was added HATU (6.7 g, 17.7 mmol) at 0 °C. After stirring for 10 minutes, *p*-anisidine (3.0 g, 24.4 mmol) and DIEA (5.3 g, 41.0 mmol) were slowly added. The resulting reaction mixture was warmed to r.t. and stirred for several hours until the reaction is complete as indicated by TLC. The reaction mixture was diluted with EtOAc and water, the separated organic layer was washed sequentially with 5% citric acid solution, and half-saturated aqueous NaCl for five times, dried over Na<sub>2</sub>SO<sub>4</sub>, filtered and concentrated under reduced pressure to afford the crude product, which was purified by column chromatography on silica gel (PE/EA 100:1~50:1) to produce the imine intermediate (~1.6 g).

A solution of the imine intermediate (1.2 g, 4.0 mmol) in THF (45 ml) and 1 M HCl (24 ml) was stirred under reflux for 3 h. The reaction mixture was diluted with EtOAc and water, the separated organic layer was washed with brine, dried over Na<sub>2</sub>SO<sub>4</sub>, filtered and concentrated under reduced pressure to afford the crude product, which was purified by column chromatography on silica gel (PE/EA 10:1) to afford **3e** (720 mg, 93% yield) as a white solid. <sup>1</sup>H NMR (400 MHz, CDCl<sub>3</sub>) δ 8.65 (s, 1H), 7.56 (d, *J* = 8.8 Hz, 2H), 6.90 (d, *J* = 8.8 Hz, 2H), 3.81 (s, 3H), 2.56 (s, 3H). <sup>13</sup>C NMR (100 MHz, CDCl<sub>3</sub>) δ 197.7, 157.4, 157.2, 129.6, 121.4, 114.5, 55.6, 24.3. HRMS (ESI-TOF) *m/z* calcd. for C<sub>10</sub>H<sub>10</sub>NO<sub>3</sub><sup>-</sup> [M-H]<sup>-</sup>: 192.0666, found 192.0665.

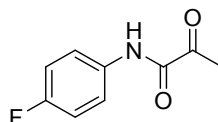

### ***N*-(4-Fluorophenyl)-2-oxopropanamide (3f)**

**3f**

Using *p*-fluoroaniline (1.0 g, 9.0 mmol), in accordance with General Procedure A, the title compound **3f** was obtained (350 mg, 22% yield) as a white solid. <sup>1</sup>H NMR (400 MHz, CDCl<sub>3</sub>) δ 8.71 (s, 1H), 7.61 (dd, *J* = 4.8, 8.8 Hz, 2H), 7.06 (t, *J* = 8.8 Hz, 2H), 2.56 (s, 3H). <sup>13</sup>C NMR (100 MHz, CDCl<sub>3</sub>) δ 197.3, 161.2, 158.2 (d, *J* = 119.0 Hz), 132.5 (d, *J* = 2.0 Hz), 121.6 (d, *J* = 8.0 Hz), 116.1 (d, *J* = 23.0 Hz), 24.2. HRMS (ESI-TOF) *m/z* calcd. for C<sub>9</sub>H<sub>7</sub>NO<sub>2</sub>F<sup>+</sup> [M-H]<sup>+</sup>: 180.0466, found 180.0461.

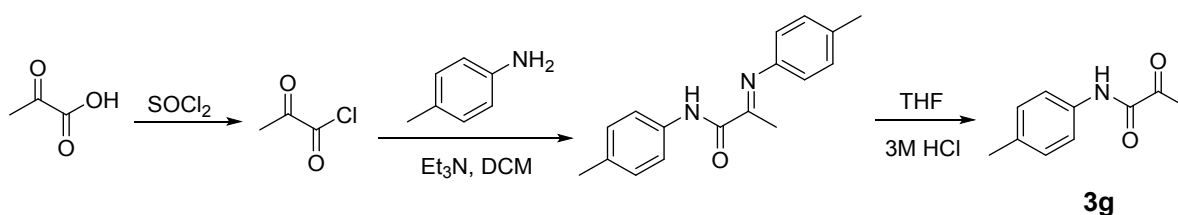

### 2-Oxo-*N*-(*p*-tolyl)propanamide (**3g**)

A solution of pyruvic acid (5.0 g, 57 mmol) in SOCl<sub>2</sub> (30 ml) was refluxed for 2 h. After cooled down to r.t., SOCl<sub>2</sub> was removed under vacuum to afford the acyl chloride intermediate.

To a cold (0 °C) solution of acyl chloride in dichloromethane (15 ml) was added *p*-toluidine (15.3 g, 143 mmol) and Et<sub>3</sub>N (23 g, 228 mmol). The medium was stirred at room temperature for several hours until the reaction is complete as indicated by TLC. The reaction mixture was diluted with dichloromethane and water, the separated organic layer was washed with 1 M HCl, brine, dried over Na<sub>2</sub>SO<sub>4</sub>, filtered and concentrated under reduced pressure to afford the crude product, which was purified by column chromatography on silica gel (PE/EA 50:1) to give the imine intermediate (~4.0 g).

A solution of the imine intermediate (4.0 g) in THF (20 ml) and 3 M HCl (20 ml) was stirred under reflux for 3 h. The reaction mixture was diluted with EtOAc and water, the separated organic layer was washed with brine, dried over Na<sub>2</sub>SO<sub>4</sub>, filtered and concentrated under vacuum to afford the crude product, which was purified by column chromatography on silica gel (PE/EA 10:1) to afford **3g** (2.2 g, 82% yield) as a pale yellow solid. <sup>1</sup>H NMR (400 MHz, CDCl<sub>3</sub>) δ 8.67 (s, 1H), 7.52 (d, *J* = 8.4 Hz, 2H), 7.17 (d, *J* = 8.4 Hz, 2H), 2.56 (s, 3H), 2.34 (s,

3H).  $^{13}\text{C}$  NMR (100 MHz,  $\text{CDCl}_3$ )  $\delta$  197.6, 157.6, 135.2, 133.9, 129.9, 119.8, 24.2, 21.1. HRMS (ESI-TOF)  $m/z$  calcd. for  $\text{C}_{10}\text{H}_{10}\text{NO}_2^- [\text{M}-\text{H}]^-$ : 176.0717, found 176.0724.

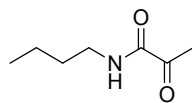

***N*-Butyl-2-oxopropanamide (3h)**

Using *n*-butylamine (1.0 g, 13.7 mmol), in accordance with General Procedure A, the title compound **3h** was obtained (504 mg, 26% yield) as a purple solid.  $^1\text{H}$  NMR (400 MHz,  $\text{CDCl}_3$ )  $\delta$  6.96 (s, 1H), 3.29-3.24 (m, 2H), 2.45 (s, 3H), 1.54-1.47 (m, 2H), 1.34 (sxt,  $J = 7.2$  Hz, 2H), 0.91 (t,  $J = 7.2$  Hz, 3H).  $^{13}\text{C}$  NMR (100 MHz,  $\text{CDCl}_3$ )  $\delta$  197.3, 160.2, 39.0, 31.2, 24.4, 19.9, 13.6. HRMS (ESI-TOF)  $m/z$  calcd. for  $\text{C}_7\text{H}_{14}\text{NO}_2$   $[\text{M}+\text{H}]^+$ : 144.1019, found 144.1018.

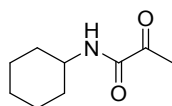

***N*-Cyclohexyl-2-oxopropanamide (3i)**

Using cyclohexylamine (1.0 g, 10.1 mmol), in accordance with General Procedure A, the title compound **3i** was obtained (1.0 g, 61% yield) as a brown crystal.  $^1\text{H}$  NMR (400 MHz,  $\text{CDCl}_3$ )  $\delta$  6.81 (s, 1H), 3.76-3.67 (m, 1H), 2.46 (s, 3H), 1.92-1.88 (m, 2H), 1.75-1.64 (m, 2H), 1.63-1.60 (m, 2H), 1.42-1.32 (m, 2H), 1.25-1.16 (m, 2H).  $^{13}\text{C}$  NMR (100 MHz,  $\text{CDCl}_3$ )  $\delta$  197.8, 159.3, 48.5, 32.8, 25.5, 24.8, 24.5. HRMS (ESI-TOF)  $m/z$  calcd. for  $\text{C}_9\text{H}_{16}\text{NO}_2$   $[\text{M}+\text{H}]^+$ : 170.1176, found 170.1179.

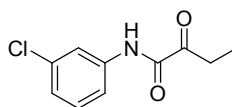

***N*-(3-Chlorophenyl)-2-oxobutanamide (3j)**

Using 3-chloroaniline (1.5 g, 11.8 mmol) and 2-oxobutyric acid (1.3 g, 13 mmol) in accordance with General Procedure A, the title compound **3j** was obtained (270 mg, 11% yield) as a pale yellow solid.  $^1\text{H}$  NMR (400 MHz,  $\text{CDCl}_3$ )  $\delta$  8.75 (s, 1H), 7.79 (t,  $J = 2.0$  Hz, 1H), 7.47 (dd,  $J = 1.2, 8.0$  Hz, 1H), 7.29 (t,  $J = 8.0$  Hz, 1H), 7.15 (dd,  $J = 1.2, 8.0$  Hz, 1H),

3.05 (q,  $J = 7.2$  Hz, 2H), 1.17 (t,  $J = 7.2$  Hz, 3H).  $^{13}\text{C}$  NMR (100 MHz,  $\text{CDCl}_3$ )  $\delta$  199.6, 157.7, 137.6, 135.1, 130.4, 125.5, 120.0, 117.9, 30.1, 7.3. HRMS (ESI-TOF)  $m/z$  calcd. for  $\text{C}_{10}\text{H}_9\text{NO}_2\text{Cl}^-$  [M-H] $^-$ : 210.0327, found 210.0326.

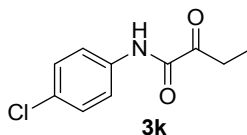

### ***N*-(4-chlorophenyl)-2-oxobutanamide (3k)**

Using 4-chloroaniline (2.6 g, 20.2 mmol) and 2-oxobutyric acid (3.3 g, 32.3 mmol) in accordance with General Procedure A, the title compound **3k** was obtained (900 mg, 20% yield) as a white solid.  $^1\text{H}$  NMR (400 MHz,  $\text{CDCl}_3$ )  $\delta$  8.76 (s, 1H), 7.60 (d,  $J = 8.8$  Hz, 2H), 7.33 (d,  $J = 8.8$  Hz, 2H), 3.04 (q,  $J = 7.2$  Hz, 2H), 1.61 (t,  $J = 7.2$  Hz, 2H).  $^{13}\text{C}$  NMR (100 MHz,  $\text{CDCl}_3$ )  $\delta$  199.8, 157.6, 135.1, 130.5, 129.4, 121.1, 30.1, 7.3. HRMS (ESI-TOF)  $m/z$  calcd. for  $\text{C}_{10}\text{H}_9\text{NO}_2\text{Cl}^-$  [M-H] $^-$ : 210.0327, found 210.0327.

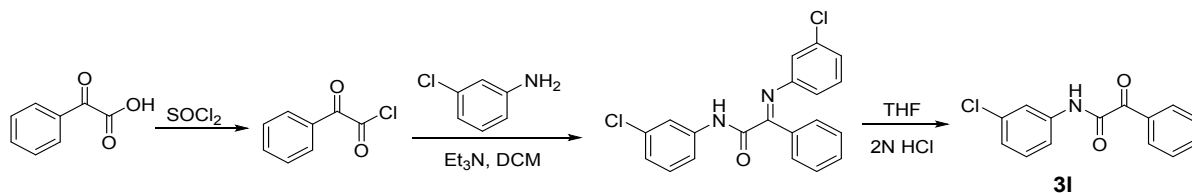

### ***N*-(3-chlorophenyl)-2-oxo-2-phenylacetamide (3l)**

A solution of benzoylformic acid (3.0 g, 20 mmol) in  $\text{SOCl}_2$  (20 ml) was refluxed for 2 h. After cooled down to r.t.,  $\text{SOCl}_2$  was removed under vacuum to afford the acyl chloride intermediate.

To a cold (0 °C) solution of acyl chloride in dichloromethane (10 ml) was added 3-chloroaniline (2.8 g, 22 mmol) and  $\text{Et}_3\text{N}$  (8.0 g, 80 mmol). The medium was stirred at room temperature for several hours until the reaction is complete as indicated by TLC. The reaction mixture was diluted with dichloromethane and water, the separated organic layer was washed with 1 M HCl, brine, dried over  $\text{Na}_2\text{SO}_4$ , filtered and concentrated under reduced pressure to afford the crude product, which was purified by column chromatography on silica gel (PE/EA 50:1) to give the imine intermediate (~2.7 g).

A solution of the imine intermediate (2.4 g) in THF (30 ml) and 2 M HCl (20 ml) was stirred under reflux for 3 h. The reaction mixture was diluted with EtOAc and water, the separated



organic layer was washed with brine, dried over Na<sub>2</sub>SO<sub>4</sub>, filtered and concentrated under vacuum to afford the crude product, which was purified by column chromatography on silica gel (PE/EA 10:1) to afford **3l** (1.5 g, 88% yield) as a pale yellow solid. <sup>1</sup>H NMR (400 MHz, CDCl<sub>3</sub>) δ 8.97 (s, 1H), 8.42 (d, *J* = 7.6 Hz, 2H), 7.872-7.868 (m, 1H), 7.68 (t, *J* = 7.6 Hz, 1H), 7.53 (t, *J* = 8.0 Hz, 3H), 7.34 (t, *J* = 8.0 Hz, 1H), 7.18 (d, *J* = 8.0 Hz, 1H). <sup>13</sup>C NMR (100 MHz, CDCl<sub>3</sub>) δ 187.0, 158.9, 137.9, 135.1, 135.0, 133.0, 131.7, 130.4, 128.8, 125.5, 120.2, 118.0. HRMS (ESI-TOF) *m/z* calcd. for C<sub>14</sub>H<sub>9</sub>NO<sub>2</sub>Cl<sup>+</sup> [M-H]<sup>+</sup>: 258.0327, found 258.0339.

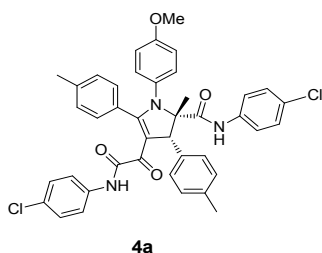

**(2S,3R)-N-(4-Chlorophenyl)-4-(2-((4-chlorophenyl)amino)-2-oxoacetyl)-1-(4-methoxyphenyl)-2-methyl-3,5-di-*p*-tolyl-2,3-dihydro-1H-pyrrole-2-carboxamide (4a)**

Using *p*-anisidine (31 mg, 0.25 mmol), *p*-tolualdehyde (60 mg, 0.5 mmol), and **3a** (100 mg, 0.5 mmol) in accordance with General Procedure B, the title compound was obtained (89 mg, 51% yield) as a yellow solid. <sup>1</sup>H NMR (400 MHz, CDCl<sub>3</sub>) δ 8.90 (s, 1H), 8.03 (s, 1H), 7.20-7.15 (m, 6H), 7.10 (d, *J* = 8.4 Hz, 4H), 7.03 (d, *J* = 8.4 Hz, 2H), 6.97 (d, *J* = 8.0 Hz, 4H), 6.86 (d, *J* = 9.2 Hz, 2H), 6.68 (d, *J* = 8.8 Hz, 2H), 5.11 (s, 1H), 3.70 (s, 3H), 2.22 (s, 3H), 2.19 (s, 3H), 1.67 (s, 3H). <sup>13</sup>C NMR (100 MHz, CDCl<sub>3</sub>) δ 184.4, 168.3, 166.3, 162.4, 158.3, 140.5, 137.3, 135.8, 135.6, 134.2, 130.8, 129.6, 129.33, 129.26, 129.21, 129.1, 128.84, 128.77, 128.69, 128.3, 128.0, 121.6, 121.1, 114.4, 111.0, 78.6, 61.0, 55.4, 23.5, 21.5, 21.1. HRMS (ESI-TOF) *m/z* calcd. for C<sub>41</sub>H<sub>36</sub>N<sub>3</sub>O<sub>4</sub>Cl<sub>2</sub> [M+H]<sup>+</sup>: 704.2077, found 704.2052.

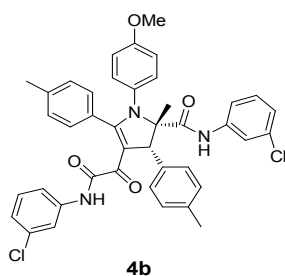

**(2S,3R)-N-(3-Chlorophenyl)-4-(2-((3-chlorophenyl)amino)-2-oxoacetyl)-1-(4-methoxyphenyl)-2-methyl-3,5-di-*p*-tolyl-2,3-dihydro-1H-pyrrole-2-carboxamide (4b)**

Using *p*-anisidine (31 mg, 0.25 mmol), *p*-tolualdehyde (60 mg, 0.5 mmol), and **3b** (100 mg, 0.5 mmol), in accordance with General Procedure B, the title compound was obtained (87 mg, 49% yield) as a yellow solid. <sup>1</sup>H NMR (400 MHz, CDCl<sub>3</sub>) δ 8.63 (s, 1H), 7.79 (s, 1H), 7.22-7.20 (m, 3H), 7.18-7.13 (m, 4H), 7.11-7.09 (m, 1H), 7.05-6.95 (m, 8H), 6.88 (d, *J* = 8.8 Hz, 2H), 6.68 (d, *J* = 8.8 Hz, 2H), 5.16 (s, 1H), 3.71 (s, 3H), 2.28 (s, 3H), 2.20 (s, 3H), 1.70 (s, 3H). <sup>13</sup>C NMR (100 MHz, CDCl<sub>3</sub>) δ 184.2, 168.4, 166.5, 162.6, 162.5, 158.3, 140.6, 138.3, 138.1, 137.5, 134.4, 134.3, 130.9, 129.73, 129.67, 129.4, 129.3, 129.1, 128.9, 128.3, 128.0, 124.8, 124.3, 120.8, 120.1, 118.7, 118.0, 114.4, 111.0, 78.7, 60.8, 55.4, 23.7, 21.4, 21.1. HRMS (ESI-TOF) *m/z* calcd. for C<sub>41</sub>H<sub>36</sub>N<sub>3</sub>O<sub>4</sub>Cl<sub>2</sub> [M+H]<sup>+</sup>: 704.2077, found 704.2076.

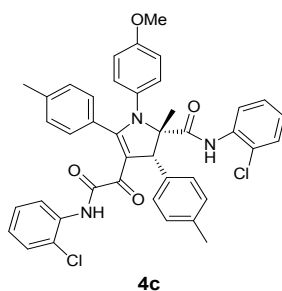

**(2S,3R)-N-(2-Chlorophenyl)-4-(2-((2-chlorophenyl)amino)-2-oxoacetyl)-1-(4-methoxyphenyl)-2-methyl-3,5-di-*p*-tolyl-2,3-dihydro-1H-pyrrole-2-carboxamide (4c)**

Using *p*-anisidine (31 mg, 0.25 mmol), *p*-tolualdehyde (60 mg, 0.5 mmol), and **3c** (100 mg, 0.5 mmol), in accordance with General Procedure B, the title compound was obtained (109 mg, 62% yield) as a yellow solid. <sup>1</sup>H NMR (400 MHz, CDCl<sub>3</sub>) δ 8.93 (s, 1H), 8.79 (s, 1H), 7.70 (dd, *J* = 8.0, 14.0 Hz, 2H), 7.37-7.35 (m, 1H), 7.32-7.29 (m, 2H), 7.271-7.269 (m, 1H), 7.18 (d, *J* = 8.0 Hz, 2H), 7.14-7.06 (m, 4H), 7.02-6.97 (m, 1H), 6.94 (d, *J* = 8.8 Hz, 3H), 6.90 (d, *J* = 7.6 Hz, 2H), 6.66 (d, *J* = 8.8 Hz, 2H), 5.28 (s, 1H), 3.70 (s, 3H), 2.28 (s, 3H), 2.10 (s, 3H), 1.65 (s, 3H). <sup>13</sup>C NMR (100 MHz, CDCl<sub>3</sub>) δ 183.8, 168.6, 166.0, 161.5, 158.3, 140.2, 137.1, 135.2, 134.1, 133.9, 131.5, 129.40, 129.35, 129.23, 129.18, 129.10, 128.9, 128.5, 128.3, 127.6, 127.4, 124.83, 124.76, 123.5, 122.9, 121.23, 121.20, 114.4, 111.8, 78.9, 61.5,

55.4, 24.3, 21.6, 21.0. HRMS (ESI-TOF)  $m/z$  calcd. for  $C_{41}H_{36}N_3O_4Cl_2$   $[M+H]^+$ : 704.2077, found 704.2079.

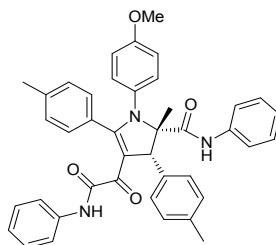

**4d**

**(2S,3R)-1-(4-Methoxyphenyl)-2-methyl-4-(2-oxo-2-(phenylamino)acetyl)-N-phenyl-3,5-di-p-tolyl-2,3-dihydro-1H-pyrrole-2-carboxamide (4d)**

Using *p*-anisidine (74 mg, 0.6 mmol), *p*-tolualdehyde (144 mg, 1.2 mmol), and **3d** (200 mg, 1.2 mmol), in accordance with General Procedure B, the title compound was obtained (75 mg, 20% yield) as a yellow solid.  $^1H$  NMR (400 MHz,  $CD_3OD$ )  $\delta$  7.32-7.28 (m, 4H), 7.21-7.14 (m, 4H), 7.12-7.07 (m, 3H), 7.05-6.99 (m, 5H), 6.93 (d,  $J$  = 8.0 Hz, 2H), 6.86 (d,  $J$  = 8.0 Hz, 2H), 6.70 (d,  $J$  = 8.4 Hz, 2H), 4.83 (s, 1H), 3.64 (s, 3H), 2.22 (s, 3H), 2.04 (s, 3H), 1.75 (s, 3H).  $^{13}C$  NMR (100 MHz,  $CD_3OD$ )  $\delta$  185.8, 170.6, 169.5, 167.4, 160.2, 141.4, 138.8, 138.1, 137.9, 135.9, 132.0, 131.5, 131.1, 130.1, 129.7, 129.6, 129.29, 129.26, 128.7, 126.3, 125.4, 124.1, 121.5, 115.1, 111.7, 79.7, 60.9, 55.8, 25.0, 21.3, 21.1. HRMS (ESI-TOF)  $m/z$  calcd. for  $C_{41}H_{38}N_3O_4$   $[M+H]^+$ : 636.2857, found 636.2840.

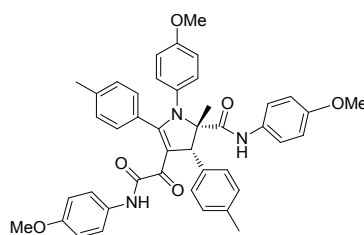

**4e**

**(2S,3R)-1-Butyl-N-(3-chlorophenyl)-4-(2-((3-chlorophenyl)amino)-2-oxoacetyl)-2-methyl-3,5-di-p-tolyl-2,3-dihydro-1H-pyrrole-2-carboxamide (4e)**

Using *p*-anisidine (62 mg, 0.5 mmol), *p*-tolualdehyde (120 mg, 1.0 mmol), and **3e** (200 mg, 1.0 mmol), in accordance with General Procedure B, the title compound was obtained (105 mg, 30% yield) as a yellow crystalline solid.  $^1H$  NMR (400 MHz,  $CD_3OD$ )  $\delta$  7.32-7.26 (m,

4H), 7.05 (d,  $J = 10.0$  Hz, 3H), 7.01 (d,  $J = 4.0$  Hz, 2H), 6.99 (s, 1H), 6.89 (d,  $J = 8.0$  Hz, 2H), 6.74 (s, 4H), 6.72-6.70 (m, 4H), 4.83 (s, 1H), 3.73 (s, 3H), 3.72 (s, 3H), 3.66 (s, 3H), 2.26 (s, 3H), 2.09 (s, 3H), 1.73 (s, 3H).  $^{13}\text{C}$  NMR (100 MHz,  $\text{CD}_3\text{OD}$ )  $\delta$  185.9, 170.7, 169.4, 167.1, 160.2, 158.8, 158.0, 141.3, 137.9, 136.03, 136.01, 132.1, 131.8, 131.5, 131.1, 130.9, 130.2, 129.7, 129.6, 128.8, 126.0, 123.1, 115.1, 114.5, 111.8, 79.5, 61.0, 55.82, 55.81, 55.80, 25.1, 21.3, 21.2. HRMS (ESI-TOF)  $m/z$  calcd. for  $\text{C}_{43}\text{H}_{42}\text{N}_3\text{O}_6$   $[\text{M}+\text{H}]^+$ : 696.3068, found 696.3066.

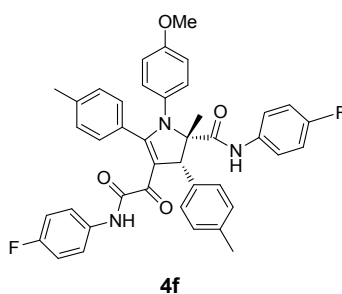

**(2S,3R)-N-(4-Fluorophenyl)-4-(2-((4-fluorophenyl)amino)-2-oxoacetyl)-1-(4-methoxyphenyl)-2-methyl-3,5-di-p-tolyl-2,3-dihydro-1H-pyrrole-2-carboxamide (4f)**

Using *p*-anisidine (62 mg, 0.5 mmol), *p*-tolualdehyde (120 mg, 1.0 mmol), and **3f** (180mg, 1.0 mmol), in accordance with General Procedure B, the title compound was obtained (85 mg, 25% yield) as a yellow solid.  $^1\text{H}$  NMR (400 MHz,  $\text{CDCl}_3$ )  $\delta$  8.49 (d,  $J = 12.0$  Hz, 1H), 7.89 (d,  $J = 7.6$  Hz, 1H), 7.22 (d,  $J = 8.0$  Hz, 2H), 7.16 (d,  $J = 8.0$  Hz, 2H), 7.11-7.03 (m, 6H), 6.98 (d,  $J = 7.6$  Hz, 2H), 6.93-6.87 (m, 6H), 6.68 (d,  $J = 8.8$  Hz, 2H), 5.20 (s, 1H), 3.71 (s, 3H), 2.29 (s, 3H), 2.19 (s, 3H), 1.69 (s, 3H).  $^{13}\text{C}$  NMR (100 MHz,  $\text{CDCl}_3$ )  $\delta$  183.9, 168.3, 166.1, 161.6, 161.0, 160.7, 158.5, 158.4, 158.3, 140.4, 137.4, 134.9, 133.10, 133.06, 131.2, 129.4, 129.2, 128.9, 128.5, 128.4, 122.3 (d,  $J = 7.0$  Hz), 121.6 (d,  $J = 8.0$  Hz), 115.7 (d,  $J = 4.0$  Hz), 115.5 (d,  $J = 4.0$  Hz), 114.5, 78.7, 61.3, 55.5, 23.8, 21.6, 21.2. HRMS (ESI-TOF)  $m/z$  calcd. for  $\text{C}_{41}\text{H}_{36}\text{N}_3\text{O}_4\text{F}_2$   $[\text{M}+\text{H}]^+$ : 672.2668, found 672.2681.

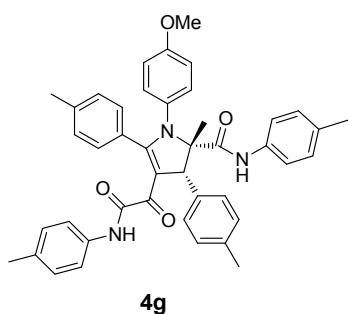

**(2S,3R)-1-(4-Methoxyphenyl)-2-methyl-4-(2-oxo-2-(p-tolylamino)acetyl)-N,3,5-tri-p-tolyl-2,3-dihydro-1H-pyrrole-2-carboxamide (4g)**

Using *p*-anisidine (172 mg, 1.4 mmol), *p*-tolualdehyde (336 mg, 2.8 mmol), and **3g** (500 mg, 2.8 mmol), in accordance with General Procedure B, the title compound was obtained (238 mg, 23% yield) as a yellow solid. <sup>1</sup>H NMR (400 MHz, CDCl<sub>3</sub>) δ 8.45 (s, 1H), 7.91 (s, 1H), 7.22 (d, *J* = 7.6 Hz, 2H), 7.18 (d, *J* = 7.6 Hz, 2H), 7.07-6.97 (m, 12H), 6.88 (d, *J* = 8.8 Hz, 2H), 6.66 (d, *J* = 8.8 Hz, 2H), 5.21 (s, 1H), 3.70 (s, 3H), 2.28 (s, 6H), 2.26 (s, 3H), 2.19 (s, 3H), 1.68 (s, 3H). <sup>13</sup>C NMR (100 MHz, CDCl<sub>3</sub>) δ 184.8, 168.0, 165.8, 162.2, 162.1, 158.0, 140.0, 136.8, 134.54, 134.50, 134.3, 134.0, 133.6, 131.0, 129.2, 129.1, 129.0, 128.9, 128.8, 128.3, 128.1, 120.5, 119.8, 114.1, 111.2, 78.3, 60.8, 55.2, 23.5, 21.3, 21.0, 20.80, 20.79. HRMS (ESI-TOF) *m/z* calcd. for C<sub>43</sub>H<sub>42</sub>N<sub>3</sub>O<sub>4</sub> [M+H]<sup>+</sup>: 664.3170, found 664.3168.

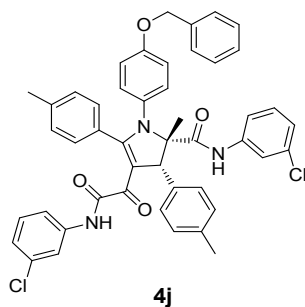

**(2S,3R)-1-(4-(Benzyloxy)phenyl)-N-(3-chlorophenyl)-4-(2-((3-chlorophenyl)amino)-2-oxoacetyl)-2-methyl-3,5-di-p-tolyl-2,3-dihydro-1H-pyrrole-2-carboxamide (4j)**

Using BnOPhNH<sub>2</sub> (50 mg, 0.25 mmol), *p*-tolualdehyde (60 mg, 0.5 mmol), and **3b** (100 mg, 0.5 mmol) in accordance with General Procedure B, the title compound was obtained (73 mg, 37% yield) as a yellow solid. <sup>1</sup>H NMR (400 MHz, CDCl<sub>3</sub>) δ 7.36-7.35 (m, 4H), 7.21(d, *J* = 8.4 Hz, 3H), 7.17-7.11 (m, 5H), 7.07 (d, *J* = 8.4 Hz, 3H), 7.03-6.94 (m, 6H), 6.88 (d, *J* = 8.8

Hz, 2H), 6.75 (d,  $J$  = 8.8 Hz, 2H), 5.19 (s, 1H), 4.94 (s, 2H), 2.31 (s, 3H), 2.20 (s, 3H), 1.71 (s, 3H).  $^{13}\text{C}$  NMR (100 MHz,  $\text{CDCl}_3$ )  $\delta$  184.0, 168.3, 166.4, 162.1, 162.0, 157.5, 140.6, 138.2, 138.0, 137.6, 136.4, 134.6, 134.5, 134.4, 131.2, 129.79, 129.76, 129.42, 129.35, 129.2, 128.9, 128.7, 128.24, 128.15, 127.6, 124.8, 124.4, 120.5, 120.0, 118.4, 117.9, 115.4, 111.1, 78.8, 70.3, 60.9, 23.6, 21.5, 21.0. HRMS (ESI-TOF)  $m/z$  calcd. for  $\text{C}_{47}\text{H}_{40}\text{Cl}_2\text{N}_3\text{O}_4$   $[\text{M}+\text{H}]^+$ : 780.2390, found 780.2401.

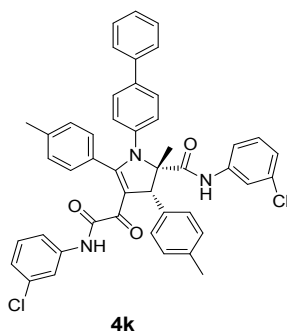

**(2S,3R)-1-([1,1'-Biphenyl]-4-yl)-N-(3-chlorophenyl)-4-(2-((3-chlorophenyl)amino)-2-oxoacetyl)-2-methyl-3,5-di-p-tolyl-2,3-dihydro-1H-pyrrole-2-carboxamide (4k)**

Using 4-aminobiphenyl (42 mg, 0.25 mmol), *p*-tolualdehyde (60 mg, 0.5 mmol), and **3b** (100 mg, 0.5 mmol), in accordance with General Procedure B, the title compound was obtained (49 mg, 26% yield) as a yellow solid.  $^1\text{H}$  NMR (400 MHz,  $\text{CDCl}_3$ )  $\delta$  8.60 (s, 1H), 7.84 (s, 1H), 7.48 (d,  $J$  = 7.2 Hz, 2H), 7.41-7.38 (m, 4H), 7.34-7.30 (m, 1H), 7.27 (s, 1H), 7.25 (s, 1H), 7.22 (s, 1H), 7.18-7.13 (m, 5H), 7.11-7.07 (m, 3H), 7.03-6.97 (m, 7H), 5.21 (s, 1H), 2.30 (s, 3H), 2.21 (s, 3H), 1.77 (s, 3H).  $^{13}\text{C}$  NMR (100 MHz,  $\text{CDCl}_3$ )  $\delta$  184.3, 168.4, 165.4, 161.7, 140.9, 139.6, 139.5, 138.2, 138.1, 137.7, 137.6, 134.51, 134.49, 134.3, 129.9, 129.8, 129.5, 129.4, 129.0, 128.27, 128.25, 128.1, 127.81, 127.77, 127.3, 126.9, 124.9, 124.6, 120.7, 120.1, 118.6, 118.0, 111.9, 78.8, 61.3, 23.6, 21.6, 21.2. HRMS (ESI-TOF)  $m/z$  calcd. for  $\text{C}_{46}\text{H}_{38}\text{Cl}_2\text{N}_3\text{O}_3$   $[\text{M}+\text{H}]^+$ : 750.2285, found 750.2258.

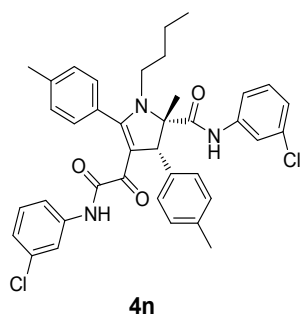

**(2S,3R)-1-Butyl-N-(3-chlorophenyl)-4-(2-((3-chlorophenyl)amino)-2-oxoacetyl)-2-methyl-3,5-di-p-tolyl-2,3-dihydro-1H-pyrrole-2-carboxamide (4n)**

Using butylamine (19 mg, 0.25 mmol), *p*-tolualdehyde (60 mg, 0.5 mmol), and **3b** (100 mg, 0.5 mmol), in accordance with General Procedure B, except that no acetic acid was added in the reaction media, the title compound was obtained (87 mg, 51% yield) as a yellow crystalline solid. <sup>1</sup>H NMR (400 MHz, CDCl<sub>3</sub>) δ 8.72 (s, 1H), 7.46-7.38 (m, 2H), 7.29 (s, 2H), 7.15 (d, *J* = 7.6 Hz, 2H), 7.12-7.07 (m, 3H), 7.04-6.97 (m, 5H), 6.90 (s, 1H), 6.83 (d, *J* = 8.0 Hz, 1H), 5.04 (s, 1H), 3.25-3.18 (m, 1H), 3.12-3.05 (m, 1H), 2.43 (s, 3H), 2.18 (s, 3H), 1.88 (s, 3H), 1.33-1.30 (m, 2H), 1.01 (sxt, *J* = 7.2 Hz, 2H), 0.66 (t, *J* = 7.2 Hz, 3H). <sup>13</sup>C NMR (100 MHz, CDCl<sub>3</sub>) δ 180.6, 169.2, 168.5, 162.0, 140.2, 138.4, 137.84, 137.83, 137.5, 136.4, 134.5, 134.4, 129.8, 129.7, 129.6, 128.7, 127.9, 124.9, 124.3, 120.8, 120.7, 119.8, 118.6, 117.7, 110.1, 79.1, 58.4, 45.5, 32.4, 23.3, 21.7, 21.0, 20.3, 13.4. HRMS (ESI-TOF) *m/z* calcd. for C<sub>38</sub>H<sub>37</sub>N<sub>3</sub>O<sub>3</sub>Cl<sub>2</sub>Na<sup>+</sup> [M+Na]<sup>+</sup>: 676.2104, found 676.2092.

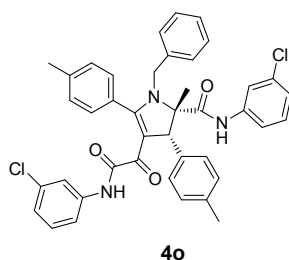

**(2S,3R)-1-Benzyl-N-(3-chlorophenyl)-4-(2-((3-chlorophenyl)amino)-2-oxoacetyl)-2-methyl-3,5-di-p-tolyl-2,3-dihydro-1H-pyrrole-2-carboxamide (4o)**

Using benzylamine (54 mg, 0.5 mmol), *p*-tolualdehyde (120 mg, 1.0 mmol), and **3b** (200 mg, 1.0 mmol), in accordance with General Procedure B, the title compound was obtained (94 mg, 28% yield) as a yellow solid. The single crystal was obtain by wap crystallization. <sup>1</sup>H NMR

(400 MHz, CDCl<sub>3</sub>)  $\delta$  8.63 (s, 1H), 7.29 (s, 1H), 7.24-7.18 (m, 7H), 7.11-7.05 (m, 4H), 7.03-6.95 (m, 6H), 6.66-6.59 (m, 3H), 5.10 (s, 1H), 4.57 (d,  $J$  = 16.4 Hz, 1H), 4.34 (d,  $J$  = 16.0 Hz, 1H), 2.37 (s, 3H), 2.17 (s, 3H), 1.79 (s, 3H). <sup>13</sup>C NMR (100 MHz, CDCl<sub>3</sub>)  $\delta$  181.0, 169.7, 168.0, 161.8, 140.1, 138.3, 137.7, 137.6, 137.4, 136.4, 134.5, 134.1, 129.8, 129.65, 129.64, 129.62, 129.5, 128.9, 128.6, 128.0, 127.8, 127.3, 124.7, 124.4, 120.5, 119.8, 118.4, 117.7, 110.5, 79.6, 58.8, 48.7, 23.5, 21.6, 21.0. HRMS (ESI-TOF)  $m/z$  calcd. for C<sub>41</sub>H<sub>36</sub>N<sub>3</sub>O<sub>3</sub>Cl<sub>2</sub> [M+H]<sup>+</sup>: 688.2128, found 688.2119.

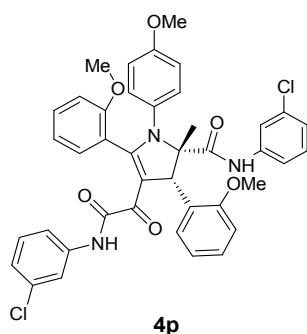

**(2S,3R)-N-(3-Chlorophenyl)-4-(2-((3-chlorophenyl)amino)-2-oxoacetyl)-3,5-bis(2-methoxyphenyl)-1-(4-methoxyphenyl)-2-methyl-2,3-dihydro-1H-pyrrole-2-carboxamide (4p)**

Using *p*-anisidine (31 mg, 0.25 mmol), 2-methoxy-benzaldehyde (68 mg, 0.5 mmol), and **3b** (100 mg, 0.5 mmol), in accordance with General Procedure B, the title compound was obtained (63 mg, 34% yield) as a yellow solid. <sup>1</sup>H NMR (400 MHz, CDCl<sub>3</sub>)  $\delta$  9.20 (s, 1H), 8.38 (s, 1H), 7.46 (s, 1H), 7.35-7.34 (m, 2H), 7.21-7.17 (m, 3H), 7.13-7.06 (m, 4H), 6.99 (d,  $J$  = 8.0 Hz, 1H), 6.94-6.92 (m, 2H), 6.87-6.83 (m, 4H), 6.64 (d,  $J$  = 8.8 Hz, 2H), 6.53-6.49 (m, 1H), 5.79 (s, 1H), 3.92 (s, 3H), 3.69 (s, 3H), 3.65 (s, 3H), 1.70 (s, 3H). <sup>13</sup>C NMR (100 MHz, CDCl<sub>3</sub>)  $\delta$  183.4, 168.9, 163.1, 161.4, 158.4, 158.2, 156.1, 139.0, 138.2, 134.7, 134.6, 131.8, 130.7, 130.0, 129.8, 128.6, 127.9, 127.8, 124.5, 124.4, 121.3, 121.1, 120.4, 120.2, 120.06, 120.05, 118.2, 117.9, 113.99, 113.97, 112.7, 111.9, 111.0, 78.8, 56.3, 55.7, 55.4, 53.8, 22.7. HRMS (ESI-TOF)  $m/z$  calcd. for C<sub>41</sub>H<sub>36</sub>Cl<sub>2</sub>N<sub>3</sub>O<sub>6</sub> [M+H]<sup>+</sup>: 736.1976, found 736.1986.



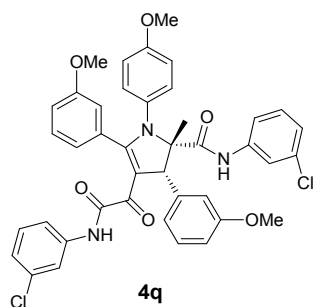

**(2S,3R)-N-(3-Chlorophenyl)-4-(2-((3-chlorophenyl)amino)-2-oxoacetyl)-3,5-bis(3-methoxyphenyl)-1-(4-methoxyphenyl)-2-methyl-2,3-dihydro-1H-pyrrole-2-carboxamide (4q)**

Using *p*-anisidine (31 mg, 0.25 mmol), 3-methoxy-benzaldehyde (68 mg, 0.5 mmol), and **3b** (100 mg, 0.5 mmol), in accordance with General Procedure B, the title compound was obtained (69 mg, 38% yield) as a yellow solid. <sup>1</sup>H NMR (400 MHz, CDCl<sub>3</sub>) δ 8.47 (s, 1H), 7.65 (s, 1H), 7.27 (s, 1H), 7.22-7.20 (m, 2H), 7.18-7.10 (m, 3H), 7.03 (t, *J* = 8.8 Hz, 3H), 6.96 (d, *J* = 8.4 Hz, 1H), 6.91-6.83 (m, 7H), 6.69-6.65 (m, 3H), 5.19 (s, 1H), 3.71 (s, 3H), 3.64 (s, 3H), 3.59 (s, 3H), 1.73 (s, 3H). <sup>13</sup>C NMR (100 MHz, CD<sub>3</sub>OD) δ 185.2, 170.6, 169.0, 167.3, 161.0, 160.42, 160.36, 140.4, 140.2, 139.6, 134.9, 134.8, 132.7, 131.79, 131.78, 131.51, 131.49, 130.7, 130.6, 130.13, 130.10, 130.05, 130.04, 126.0, 125.1, 123.8, 121.9, 121.3, 119.5, 115.12, 115.11, 113.7, 111.6, 79.8, 61.3, 55.8, 55.6, 55.5, 24.7. HRMS (ESI-TOF) *m/z* calcd. for C<sub>41</sub>H<sub>36</sub>Cl<sub>2</sub>N<sub>3</sub>O<sub>6</sub> [M+H]<sup>+</sup>: 736.1976, found 736.1974.

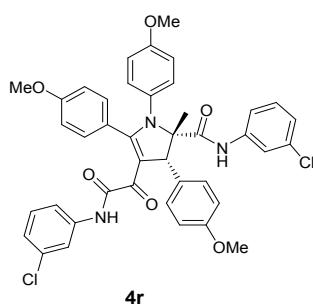

**(2S,3R)-N-(3-Chlorophenyl)-4-(2-((3-chlorophenyl)amino)-2-oxoacetyl)-1,3,5-tris(4-methoxyphenyl)-2-methyl-2,3-dihydro-1H-pyrrole-2-carboxamide (4r)**

Using *p*-anisidine (31 mg, 0.25 mmol), 4-methoxy-benzaldehyde (68 mg, 0.5 mmol), and **3b** (100 mg, 0.5 mmol), in accordance with General Procedure B, the title compound was

obtained (73 mg, 40% yield) as a yellow solid.  $^1\text{H}$  NMR (400 MHz,  $\text{CDCl}_3$ )  $\delta$  8.81 (s, 1H), 8.14 (s, 1H), 7.25-7.23 (m, 4H), 7.21-7.17 (m, 2H), 7.15-7.11 (m, 1H), 7.09-7.05 (m, 2H), 7.03-6.96 (m, 4H), 6.86 (d,  $J$  = 8.8 Hz, 2H), 6.70-6.67 (m, 5H), 5.06 (s, 1H), 3.71 (s, 3H), 3.68 (s, 3H), 3.65 (s, 3H), 1.65 (s, 3H).  $^{13}\text{C}$  NMR (100 MHz,  $\text{CDCl}_3$ )  $\delta$  184.1, 168.6, 166.2, 162.54, 162.50, 161.2, 159.2, 158.4, 138.4, 138.25, 138.23, 134.5, 131.24, 131.23, 131.1, 129.8, 129.5, 129.0, 124.8, 124.5, 123.2, 120.8, 120.1, 118.7, 118.0, 114.6, 114.1, 113.9, 110.9, 78.6, 60.7, 55.5, 55.34, 55.27, 23.9. HRMS (ESI-TOF)  $m/z$  calcd. for  $\text{C}_{41}\text{H}_{36}\text{Cl}_2\text{N}_3\text{O}_6$   $[\text{M}+\text{H}]^+$ : 736.1976, found 736.1956.

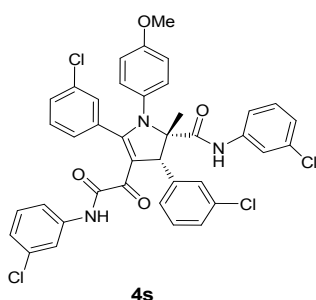

**(2S,3R)-N,3,5-Tris(3-chlorophenyl)-4-(2-((3-chlorophenyl)amino)-2-oxoacetyl)-1-(4-methoxyphenyl)-2-methyl-2,3-dihydro-1H-pyrrole-2-carboxamide (4s)**

Using *p*-anisidine (31 mg, 0.25 mmol), 3-chlorobenzaldehyde (70 mg, 0.5 mmol), and **3b** (100 mg, 0.5 mmol), in accordance with General Procedure B, the title compound was obtained (56 mg, 30% yield) as a yellow crystalline solid.  $^1\text{H}$  NMR (400 MHz,  $\text{CD}_3\text{OD}$ )  $\delta$  7.47 (d,  $J$  = 10.4 Hz, 2H), 7.36-7.32 (m, 2H), 7.29 (s, 1H), 7.22-7.18 (m, 2H), 7.17-7.13 (m, 2H), 7.11-7.06 (m, 7H), 7.04-6.98 (m, 2H), 6.74 (d,  $J$  = 8.8 Hz, 2H), 4.86 (s, 1H), 3.66 (s, 3H), 1.80 (s, 3H).  $^{13}\text{C}$  NMR (100 MHz,  $\text{CD}_3\text{OD}$ )  $\delta$  184.8, 170.0, 167.7, 167.1, 160.6, 141.4, 140.0, 139.4, 135.1, 135.0, 134.90, 134.89, 133.4, 131.9, 131.1, 131.0, 130.8, 130.7, 130.6, 130.51, 130.45, 129.4, 128.5, 126.1, 125.3, 123.6, 121.7, 121.12, 121.11, 119.3, 115.22, 115.21, 111.3, 80.0, 60.7, 55.8, 24.4. HRMS (ESI-TOF)  $m/z$  calcd. for  $\text{C}_{39}\text{H}_{30}\text{Cl}_4\text{N}_3\text{O}_4$   $[\text{M}+\text{H}]^+$ : 744.0985, found 744.0984.

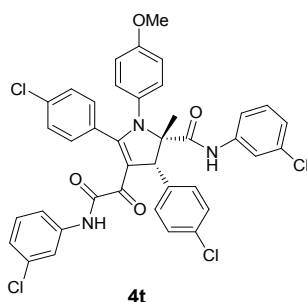

**(2S,3R)-N-(3-Chlorophenyl)-3,5-bis(4-chlorophenyl)-4-(2-((3-chlorophenyl)amino)-2-oxoacetyl)-1-(4-methoxyphenyl)-2-methyl-2,3-dihydro-1H-pyrrole-2-carboxamide (4t)**

Using *p*-anisidine (31 mg, 0.25 mmol), 4-chlorobenzaldehyde (70 mg, 0.5 mmol), and **3b** (100 mg, 0.5 mmol), in accordance with General Procedure B, the title compound was obtained (55 mg, 30% yield) as a yellow solid. <sup>1</sup>H NMR (400 MHz, CDCl<sub>3</sub>) δ 8.66 (s, 1H), 7.57 (s, 1H), 7.28-7.21 (m, 7H), 7.17-7.13 (m, 5H), 7.09-6.99 (m, 3H), 6.88 (d, *J* = 8.4 Hz, 3H), 6.70 (d, *J* = 8.4 Hz, 2H), 5.23 (s, 1H), 3.72 (s, 3H), 1.72 (s, 3H). <sup>13</sup>C NMR (100 MHz, CDCl<sub>3</sub>) δ 182.7, 167.8, 165.7, 161.3, 158.8, 137.9, 137.6, 136.7, 136.4, 134.7, 133.8, 130.6, 130.2, 130.06, 130.05, 129.7, 129.6, 129.29, 129.28, 128.90, 128.88, 125.3, 124.9, 120.6, 119.9, 118.4, 117.8, 114.7, 110.8, 79.0, 60.7, 55.5, 23.9. HRMS (ESI-TOF) *m/z* calcd. for C<sub>39</sub>H<sub>30</sub>Cl<sub>4</sub>N<sub>3</sub>O<sub>4</sub> [M+H]<sup>+</sup>: 744.0985, found 744.0968.

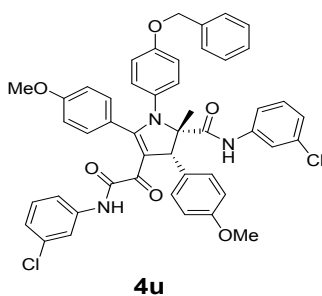

**(2S,3R)-1-(4-(Benzyloxy)phenyl)-N-(3-chlorophenyl)-4-(2-((3-chlorophenyl)amino)-2-oxoacetyl)-3,5-bis(4-methoxyphenyl)-2-methyl-2,3-dihydro-1H-pyrrole-2-carboxamide (4u)**

Using BnOPhNH<sub>2</sub> (76 mg, 0.38 mmol), 4-methoxy-benzaldehyde (103 mg, 0.76 mmol), and **3b** (150 mg, 0.76 mmol), in accordance with General Procedure B, the title compound was obtained (100 mg, 32% yield) as a yellow solid. <sup>1</sup>H NMR (400 MHz, CDCl<sub>3</sub>) δ 8.65 (s, 1H),

7.86 (s, 1H), 7.36-7.35 (m, 6H), 7.25-7.23 (m, 3H), 7.18 (d,  $J = 8.4$  Hz, 2H), 7.15-7.09 (m, 2H), 7.05-6.97 (m, 4H), 6.86 (d,  $J = 8.4$  Hz, 2H), 6.77-6.69 (m, 6H), 5.11 (s, 1H), 4.95 (s, 2H), 3.71 (s, 3H), 3.65 (s, 3H), 1.68 (s, 3H).  $^{13}\text{C}$  NMR (100 MHz,  $\text{CDCl}_3$ )  $\delta$  184.1, 168.5, 166.1, 162.4, 161.2, 159.2, 157.6, 138.4, 138.2, 136.4, 134.52, 134.45, 131.3, 131.19, 131.17, 129.88, 129.84, 129.5, 128.8, 128.7, 128.3, 127.6, 124.8, 124.5, 123.1, 120.6, 120.0, 118.5, 118.0, 115.5, 114.1, 114.0, 110.9, 78.6, 70.3, 60.7, 55.4, 55.3, 23.7. HRMS (ESI-TOF)  $m/z$  calcd. for  $\text{C}_{47}\text{H}_{39}\text{Cl}_2\text{N}_3\text{O}_6\text{Na}^+ [\text{M}+\text{Na}]^+$ : 834.2108, found 834.2102.

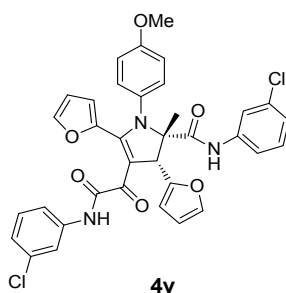

**(2S,3R)-N-(3-Chlorophenyl)-4-(2-((3-chlorophenyl)amino)-2-oxoacetyl)-3,5-di(furan-2-yl)-1-(4-methoxyphenyl)-2-methyl-2,3-dihydro-1H-pyrrole-2-carboxamide (4v)**

Using *p*-anisidine (31 mg, 0.25 mmol), furan-2-carbaldehyde (48 mg, 0.5 mmol), and **3b** (100 mg, 0.5 mmol), in accordance with General Procedure B, the title compound was obtained (31 mg, 19% yield) as a yellow solid.  $^1\text{H}$  NMR (400 MHz,  $\text{CDCl}_3$ )  $\delta$  8.72 (s, 1H), 8.49 (s, 1H), 7.57-7.55 (m, 2H), 7.32 (s, 1H), 7.28-7.26 (m, 2H), 7.23-7.18 (m, 3H), 7.09-7.06 (m, 2H), 6.99 (d,  $J = 8.8$  Hz, 2H), 6.81 (d,  $J = 8.8$  Hz, 2H), 6.38-6.37 (m, 1H), 6.28-6.27 (m, 1H), 6.21 (s, 2H), 5.16 (s, 1H), 3.78 (s, 3H), 1.62 (s, 3H).  $^{13}\text{C}$  NMR (100 MHz,  $\text{CDCl}_3$ )  $\delta$  184.0, 168.3, 161.6, 159.2, 153.2, 150.5, 144.9, 144.2, 142.6, 138.7, 138.5, 134.8, 134.6, 131.1, 130.1, 130.0, 128.7, 124.73, 124.69, 120.5, 119.8, 118.5, 117.8, 116.6, 114.8, 112.4, 110.8, 109.0, 107.2, 76.9, 55.6, 55.0, 22.9. HRMS (ESI-TOF)  $m/z$  calcd. for  $\text{C}_{35}\text{H}_{28}\text{Cl}_2\text{N}_3\text{O}_6$   $[\text{M}+\text{H}]^+$ : 656.1350, found 656.1348.

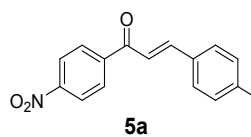

**(E)-1-(4-Nitrophenyl)-3-(p-tolyl)prop-2-en-1-one (5a)**

4-Tolualdehyde (0.73 g, 6.05 mmol) and a 6 M NaOH aqueous solution (50  $\mu$ L, 0.3 mmol) were successively added to a solution of 4-nitroacetophenone (1.0 g, 6.05 mmol) in methanol (4 ml). The reaction was stirred for 4h at r.t. The precipitate was filtered, washed with MeOH and dried in vacuo to provide chalcone **5a** as a white solid (1.2 g, 75% yield). The spectroscopic data are consistent with material from commercial sources.  $^1\text{H}$  NMR (400 MHz,  $\text{CDCl}_3$ )  $\delta$  8.34 (d,  $J$  = 8.8 Hz, 2H), 8.13 (d,  $J$  = 8.8 Hz, 2H), 7.82 (d,  $J$  = 15.6 Hz, 1H), 7.56 (d,  $J$  = 8.0 Hz, 2H), 7.44 (d,  $J$  = 15.6 Hz, 1H), 7.25 (d,  $J$  = 8.4 Hz, 2H), 2.41 (s, 3H).  $^{13}\text{C}$  NMR (100 MHz,  $\text{CDCl}_3$ )  $\delta$  189.2, 150.1, 147.0, 143.4, 142.1, 131.7, 130.0, 129.5, 128.9, 123.9, 120.4, 21.7.

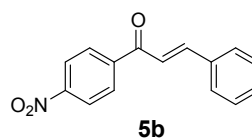

**(E)-1-(4-Nitrophenyl)-3-phenylprop-2-en-1-one (5b)**

4-Nitroacetophenone (1.0 g, 6.05 mmol) and benzaldehyde (642 mg, 6.05 mmol) were dissolved in methanol (30 ml). An aqueous solution of sodium hydroxide (5 % w/v, 15 ml) was added slowly and the reaction mixture was stirred at room temperature for 12 h. The obtained solid was filtered, washed with water (15 ml) and crystallized from methanol to provide chalcone **5b** as a yellow solid (1.2 g, 80% yield). The spectroscopic data are consistent with material from commercial sources.  $^1\text{H}$  NMR (400 MHz,  $\text{CDCl}_3$ )  $\delta$  8.36 (d,  $J$  = 8.8 Hz, 2H), 8.15 (d,  $J$  = 8.8 Hz, 2H), 7.85 (d,  $J$  = 15.6 Hz, 1H), 7.67-7.65 (m, 2H), 7.51-7.45 (m, 4H).  $^{13}\text{C}$  NMR (100 MHz,  $\text{CDCl}_3$ )  $\delta$  189.2, 150.2, 146.9, 143.2, 134.4, 131.4, 129.5, 129.3, 128.8, 124.0, 121.4.

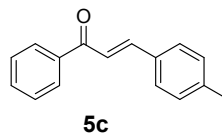

**(E)-1-phenyl-3-(p-tolyl)prop-2-en-1-one (5c)**

Acetophenone (2.0 g, 16.6 mmol) and *p*-tolualdehyde (2.0 g, 16.6 mmol) were dissolved in methanol (80 ml). An aqueous solution of sodium hydroxide (5 % w/v, 40 ml) was added slowly and the reaction mixture was stirred at room temperature for 12 h. The obtained solid was filtered, washed with water (15 ml) and crystallized from methanol to provide chalcone **5c** as a yellow solid (2.7 g, 73% yield). The spectroscopic data are consistent with previously

reported.<sup>1</sup> <sup>1</sup>H NMR (400 MHz, CDCl<sub>3</sub>) δ 8.03-8.01 (m, 2H), 7.80 (d, *J* = 16.0 Hz, 1H), 7.61-7.48 (m, 6H), 7.23 (d, *J* = 8.0 Hz, 2H), 2.40 (s, 3H). <sup>13</sup>C NMR (100 MHz, CDCl<sub>3</sub>) δ 190.8, 145.1, 141.3, 138.5, 132.8, 132.3, 129.9, 128.7, 128.63, 128.62, 121.2, 21.7.

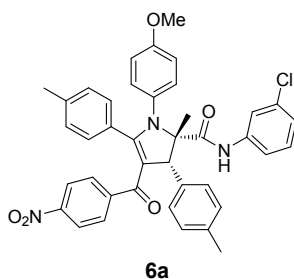

**(2S,3R)-N-(3-Chlorophenyl)-1-(4-methoxyphenyl)-2-methyl-4-(4-nitrobenzoyl)-3,5-di-p-tolyl-2,3-dihydro-1H-pyrrole-2-carboxamide (6a)**

A solution of 4-anisidine (63 mg, 0.51 mmol), 4-tolualdehyde (123 mg, 1.02 mmol), pyruvic amide **3b** (200 mg, 1.02 mmol) and chalcone **5a** (272 mg, 1.02 mmol) in EtOH (19 ml) and HOAc (1.6 ml) was stirred under reflux for 8 h. After cooled down to r.t., ethanol was removed under vacuum, and the residue was diluted with EtOAc and water. After separation, the aqueous phase was extracted two more times with EtOAc. The combined organic phases were successively washed with saturated aqueous KHSO<sub>4</sub>, saturated aqueous NaHCO<sub>3</sub>, and brine, dried over MgSO<sub>4</sub>, concentrated *in vacuo* and chromatographed gradiently on silica gel with pentane/diethyl ether (5:1~1:1) to give the dihydropyrrole **6a** (80 mg, 23% yield) as a yellow solid, and **4b** (80 mg, 23% yield) as a yellow solid. **6a**: <sup>1</sup>H NMR (400 MHz, CDCl<sub>3</sub>) δ 7.76 (d, *J* = 8.4 Hz, 2H), 7.41 (d, *J* = 8.4 Hz, 2H), 7.21-7.18 (m, 2H), 7.06-7.02 (m, 3H), 6.92-6.85 (m, 7H), 6.70 (d, *J* = 7.2 Hz, 2H), 6.65 (d, *J* = 8.8 Hz, 2H), 4.95 (s, 1H), 3.69 (s, 3H), 2.23 (s, 3H), 2.08 (s, 3H), 1.70 (s, 3H). <sup>13</sup>C NMR (100 MHz, CDCl<sub>3</sub>) δ 189.0, 169.3, 162.8, 158.0, 148.0, 146.3, 140.2, 137.9, 137.8, 135.2, 134.4, 131.6, 130.4, 129.75, 129.73, 129.6, 129.1, 128.6, 127.9, 127.7, 125.0, 122.4, 121.0, 118.9, 114.7, 114.4, 77.7, 62.4, 55.4, 23.7, 21.3, 21.1. HRMS (ESI-TOF) *m/z* calcd. for C<sub>40</sub>H<sub>35</sub>N<sub>3</sub>O<sub>5</sub>Cl [M+H]<sup>+</sup>: 672.2260, found 672.2245.

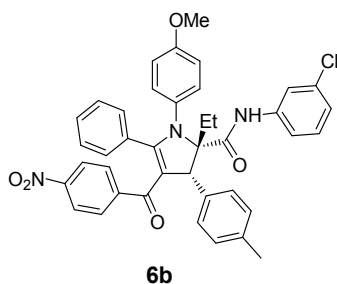

**(2S,3R)-N-(3-Chlorophenyl)-2-ethyl-1-(4-methoxyphenyl)-4-(4-nitrobenzoyl)-3,5-di-p-tolyl-2,3-dihydro-1H-pyrrole-2-carboxamide (**6b**)**

A solution of 4-anisidine (117 mg, 0.95 mmol), 4-tolualdehyde (114 mg, 0.95 mmol), pyruvic amide **3j** (200 mg, 0.95 mmol) and chalcone **5b** (240 mg, 0.95 mmol) in EtOH (38 ml) and HOAc (3.0 ml) was stirred under reflux for 8 h. After cooled down to r.t., ethanol was removed under vacuum, and the residue was diluted with EtOAc and water. After separation, the aqueous phase was extracted two more times with EtOAc. The combined organic phases were successively washed with saturated aqueous KHSO<sub>4</sub>, saturated aqueous NaHCO<sub>3</sub>, and brine, dried over MgSO<sub>4</sub>, concentrated *in vacuo* and chromatographed gradiently on silica gel with PE/EA (5:1~3:1) to give the dihydropyrrole product **6b** as a yellow solid (98 mg, 16% yield). <sup>1</sup>H NMR (400 MHz, CD<sub>3</sub>OD) δ 7.76 (d, *J* = 8.4 Hz, 2H), 7.41-7.36 (m, 4H), 7.23-7.21 (m, 2H), 7.18-7.14 (m, 2H), 7.07-7.02 (m, 2H), 6.97 (d, *J* = 8.8 Hz, 3H), 6.89 (d, *J* = 7.6 Hz, 2H), 6.74-6.72 (m, 1H), 6.67 (d, *J* = 9.2 Hz, 3H), 5.16 (s, 1H), 3.66 (s, 3H), 2.52-2.46 (m, 1H), 2.16-2.09 (m, 1H), 2.05 (s, 3H), 1.16 (t, *J* = 7.2 Hz, 3H). <sup>13</sup>C NMR (100 MHz, CD<sub>3</sub>OD) δ 190.6, 170.9, 168.5, 159.5, 149.0, 148.2, 141.0, 140.1, 139.7, 134.7, 132.5, 130.6, 130.5, 130.4, 129.3, 129.22, 129.21, 129.18, 128.3, 125.9, 123.8, 123.37, 123.35, 121.9, 115.8, 114.8, 83.1, 57.5, 55.8, 27.2, 21.1, 8.6. HRMS (ESI-TOF) *m/z* calcd. for C<sub>40</sub>H<sub>35</sub>N<sub>3</sub>O<sub>5</sub>Cl [M+H]<sup>+</sup>: 672.2260, found 672.2262.

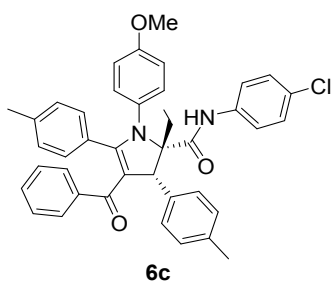

**(2S,3R)-4-benzoyl-N-(4-chlorophenyl)-2-ethyl-1-(4-methoxyphenyl)-3,5-di-p-tolyl-2,3-dihydro-1H-pyrrole-2-carboxamide (6c)**

A solution of *p*-anisidine (58 mg, 0.47 mmol), *p*-tolualdehyde (56 mg, 0.47 mmol), **3k** (100 mg, 0.47 mmol), and **5c** (105 mg, 0.47 mmol) in EtOH (9.2 ml) and HOAc (0.74 ml) was stirred under reflux for 8 h. After cooled down to r.t., ethanol was removed under vacuum, and the residue was diluted with ethyl acetate and water. After separation, the aqueous phase was extracted two more times with ethyl acetate. The combined organic phases were successively washed with saturated aqueous KHSO<sub>4</sub>, saturated aqueous NaHCO<sub>3</sub>, and brine, dried over MgSO<sub>4</sub>, concentrated *in vacuo* and chromatographed gradiently on silica gel with PE/EA (5:1~3:1) to give the dihydropyrrole product **6c** as a yellow solid (53 mg, 18% yield). <sup>1</sup>H NMR (400 MHz, CDCl<sub>3</sub>) δ 7.36 (s, 1H), 7.31 (d, *J* = 7.2 Hz, 2H), 7.19 (d, *J* = 8.4 Hz, 2H), 7.15 (d, *J* = 8.0 Hz, 2H), 7.08 (t, *J* = 7.2 Hz, 2H), 6.96-6.93 (m, 5H), 6.90 (d, *J* = 8.4 Hz, 2H), 6.78 (d, *J* = 9.2 Hz, 2H), 6.70 (d, *J* = 7.2 Hz, 2H), 6.60 (d, *J* = 8.8 Hz, 2H), 5.26 (s, 1H), 3.68 (s, 3H), 2.37-2.21 (m, 1H), 2.19 (s, 3H), 3.12 (s, 3H), 2.09-2.03 (m, 1H), 1.07 (t, *J* = 7.2 Hz, 3H). <sup>13</sup>C NMR (100 MHz, CDCl<sub>3</sub>) δ 192.1, 169.6, 160.4, 157.1, 140.4, 139.2, 137.0, 135.64, 135.61, 132.2, 130.3, 129.9, 129.7, 129.4, 128.9, 128.8, 128.5, 128.3, 128.1, 127.8, 127.3, 121.7, 114.8, 114.0, 80.3, 57.2, 55.4, 26.5, 21.3, 21.1, 8.3. HRMS (ESI-TOF) *m/z* calcd. for C<sub>41</sub>H<sub>38</sub>N<sub>2</sub>O<sub>3</sub>Cl [M+H]<sup>+</sup>: 641.2565, found 641.2558.

### 3. Mechanism studies

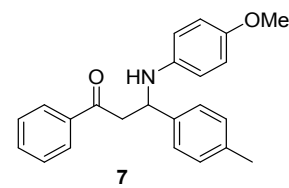

**(E)-4-(4-methoxyphenyl)-1-phenyl-3-(p-tolyl)but-2-en-1-one (7)**

Compound **7** was prepared following the known method<sup>2</sup>.

To a solution of **5c** (1.3 g, 6.0 mmol) in anhydrous EtOH (3 ml) was added 4-methoxyaniline (1.1 g, 9.0 mmol) and K<sub>3</sub>PO<sub>4</sub> (192 mg). After stirring for five hours at r.t., the reaction mixture was diluted with ethyl acetate and water. After separation, the aqueous phase was extracted two more times with ethyl acetate. The combined organic phase was washed with



brine, dried over Na<sub>2</sub>SO<sub>4</sub>, filtered and concentrated under reduced pressure to afford the crude product, which was purified by column chromatography on silica gel with PE/EA (50:1), the title compound was obtained (550 mg, 27% yield) as a white solid. <sup>1</sup>H NMR (400 MHz, CDCl<sub>3</sub>) δ 7.92 (d, *J* = 7.6 Hz, 2H), 7.56 (t, *J* = 7.2 Hz, 1H), 7.45 (t, *J* = 7.6 Hz, 2H), 7.33 (d, *J* = 3.6 Hz, 2H), 7.14 (d, *J* = 8.0 Hz, 2H), 6.69 (d, *J* = 8.8 Hz, 2H), 6.54 (d, *J* = 8.8 Hz, 2H), 4.91 (t, *J* = 7.2 Hz, 1H), 4.27 (s, 1H), 3.69 (s, 3H), 3.48 (dd, *J* = 5.2, 16.0 Hz, 1H), 3.39 (dd, *J* = 7.6, 16.0 Hz, 1H), 2.32 (s, 3H). <sup>13</sup>C NMR (100 MHz, CDCl<sub>3</sub>) δ 198.6, 152.4, 141.4, 140.4, 137.0, 136.9, 133.5, 129.6, 128.8, 128.3, 126.5, 115.5, 114.8, 55.8, 55.5, 46.6, 21.2. HRMS (ESI-TOF) *m/z* calcd. for C<sub>23</sub>H<sub>24</sub>NO<sub>2</sub> [M+H]<sup>+</sup>: 346.1802, found 346.1786.

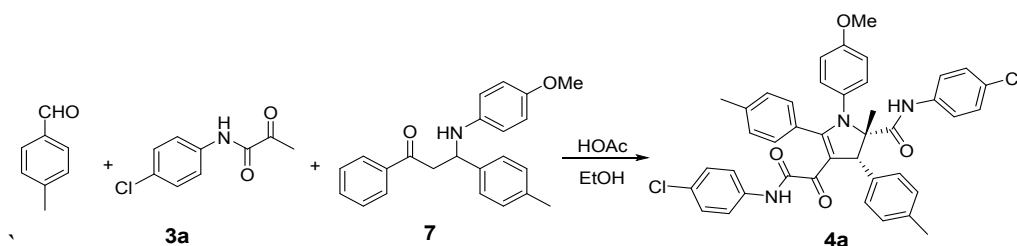

Using *p*-tolualdehyde (49 mg, 0.41 mmol), **3a** (80 mg, 0.41 mmol), and **7** (140 mg, 0.41 mmol) in EtOH (8 ml) and HOAc (0.64 ml) was stirred under reflux for 8 h. After cooled down to r.t., ethanol was removed under vacuum, and the residue was diluted with ethyl acetate and water. After separation, the aqueous phase was extracted two more times with ethyl acetate. The combined organic phases were successively washed with saturated aqueous KHSO<sub>4</sub>, saturated aqueous NaHCO<sub>3</sub>, and brine, dried over MgSO<sub>4</sub>, concentrated *in vacuo* and chromatographed gradiently on silica gel with PE/EA 5:1~3:1 to give the dihydropyrrole product **4a** as a yellow solid (64 mg, 45%).

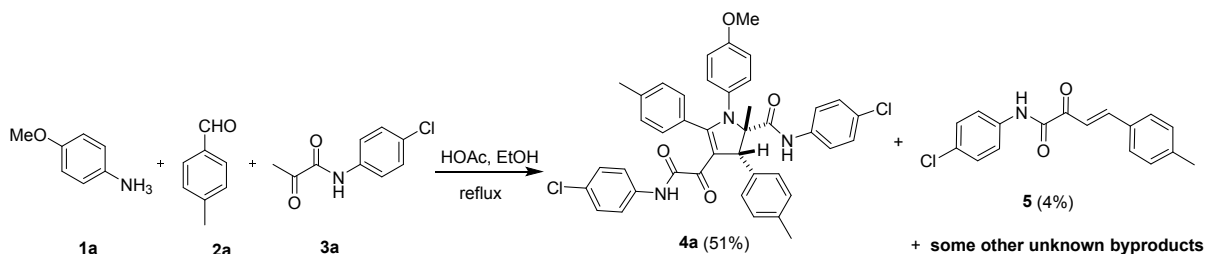

Using *p*-anisidine (31 mg, 0.25 mmol), *p*-tolualdehyde (60 mg, 0.5 mmol), and **3a** (100 mg, 0.5 mmol) in accordance with General Procedure B, the title compound was obtained (89 mg,

51% yield) as a yellow solid, and the aldol condensation product **5** was obtained (6 mg, 4% yield) as a yellow solid, along with unknown byproducts. Spectra data of the aldol product:  $^1\text{H}$  NMR (400 MHz,  $\text{CDCl}_3$ )  $\delta$  9.03 (s, 1H), 8.01 (d,  $J = 16.0$  Hz, 1H), 7.82 (d,  $J = 16.0$  Hz, 1H), 7.66 (d,  $J = 8.0$  Hz, 2H), 7.60 (d,  $J = 7.2$  Hz, 2H), 7.35 (d,  $J = 8.0$  Hz, 2H), 7.26-7.24 (m, 2H), 2.41 (s, 3H).  $^{13}\text{C}$  NMR (100 MHz,  $\text{CDCl}_3$ )  $\delta$  185.2, 159.1, 149.4, 142.9, 135.4, 131.7, 130.4, 130.1, 129.6, 129.4, 121.1, 116.8, 21.8. HRMS (ESI-TOF)  $m/z$  calcd. for  $\text{C}_{17}\text{H}_{14}\text{ClNO}_2\text{Na} [\text{M}+\text{Na}]^+$ : 322.0605, found 322.0602.

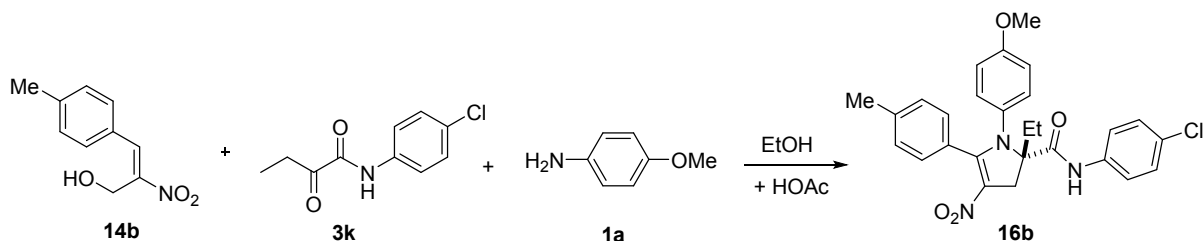

Using *p*-anisidine (58 mg, 0.47 mmol), **14b** (91 mg, 0.47 mmol), and **3k** (100 mg, 0.47 mmol), in accordance with General Procedure B, the title compound was obtained (45 mg, 19% yield) as a yellow solid.  $^1\text{H}$  NMR (400 MHz,  $\text{CDCl}_3$ )  $\delta$  8.59 (s, 1H), 7.54 (d,  $J = 8.4$  Hz, 2H), 7.30 (d,  $J = 8.4$  Hz, 2H), 7.14 (d,  $J = 8.0$  Hz, 2H), 6.98 (d,  $J = 7.6$  Hz, 2H), 6.78 (d,  $J = 8.4$  Hz, 2H), 6.61 (d,  $J = 8.4$  Hz, 2H), 3.70-3.66 (m, 4H), 3.52 (d,  $J = 16.4$  Hz, 1H), 2.26 (s, 3H), 2.07-2.02 (m, 1H), 1.89-1.83 (m, 1H), 1.06 (t,  $J = 7.2$  Hz, 3H).  $^{13}\text{C}$  NMR (100 MHz,  $\text{CDCl}_3$ )  $\delta$  168.8, 161.3, 159.0, 140.3, 136.7, 129.7, 129.6, 129.3, 129.0, 128.7, 125.9, 122.3, 121.4, 114.3, 75.7, 55.4, 36.9, 27.8, 21.7, 7.5. HRMS (ESI-TOF)  $m/z$  calcd. for  $\text{C}_{27}\text{H}_{25}\text{N}_3\text{O}_4\text{Cl} [\text{M}-\text{H}]^-$ : 490.1539, found 490.1535.

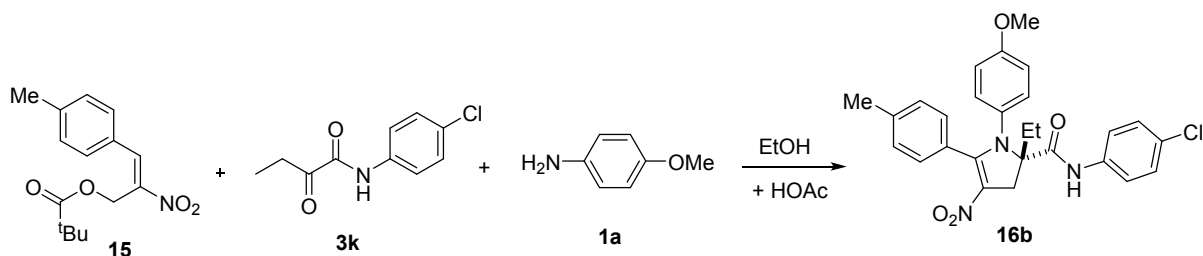

Using *p*-anisidine (58 mg, 0.47 mmol), **15** (130 mg, 0.47 mmol), and **3k** (100 mg, 0.47 mmol), in accordance with General Procedure B, the title compound was obtained (55 mg, 23% yield) as a yellow solid.

#### 4. ORTEP Drawing for 4o

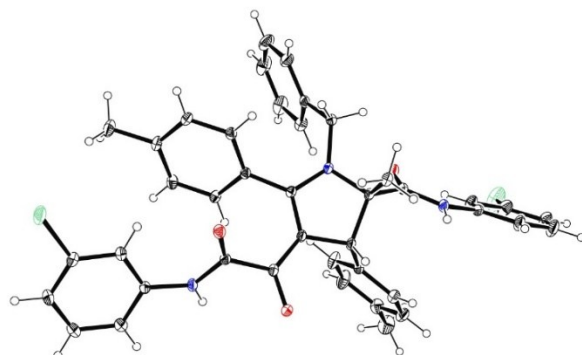

#### 5. NOESY for 4a

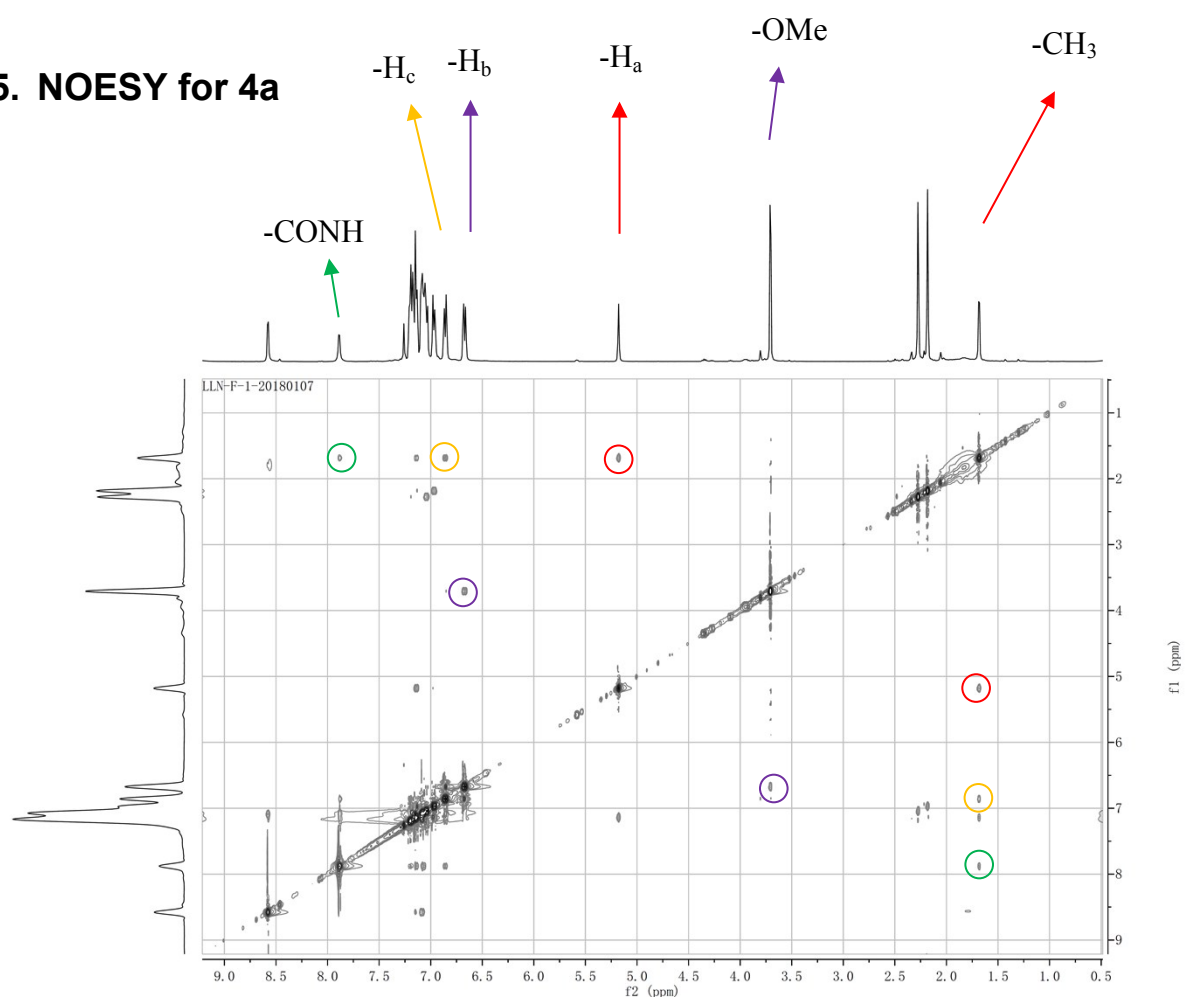

The correlation between the methyl group and the proton was observed:

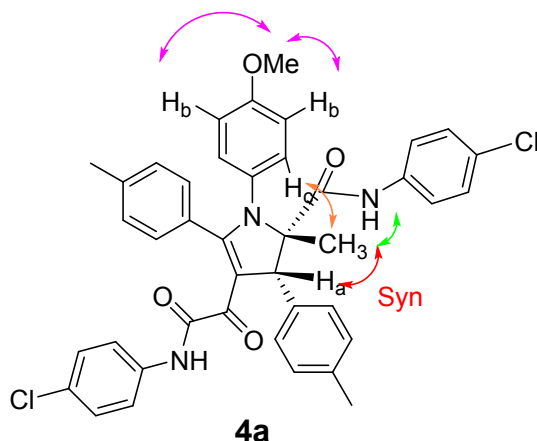

## 6. Kinetics of $\alpha$ -Glucosidase Inhibition

The commercially available  $\alpha$ -glucosidase from baker's yeast (Sigma, G5003) was selected as the target protein using *p*-nitrophenyl- $\alpha$ -D-glucopyranoside (pNGP, Sigma, N1377) as the substrate. The compounds and acarbose were dissolved in DMSO. The enzyme and the substrate were dissolved in 0.05 M potassium phosphate buffer with pH 6.8. The enzymatic reaction mixture composed of 20  $\mu$ L  $\alpha$ -glucosidase (0.03 U/ml), 30  $\mu$ L of substrate (0.6, 1.2, 2.4 mM), 10  $\mu$ L of test compounds (0, 0.62, 5  $\mu$ M) or acarbose (0, 0.19, 0.39 mM), and 140  $\mu$ L of potassium phosphate buffer was incubated at 37  $^{\circ}$ C for 20 min. The enzymatic activity was detected by spectrophotometer at the wavelength of 405 nm. The inhibitory kinetics of the investigated compounds on  $\alpha$ -glucosidase was analyzed using the Lineweaver-Burk plot of the substrate concentration and velocity. Results are the average of three independent experiments, each performed in duplicate.

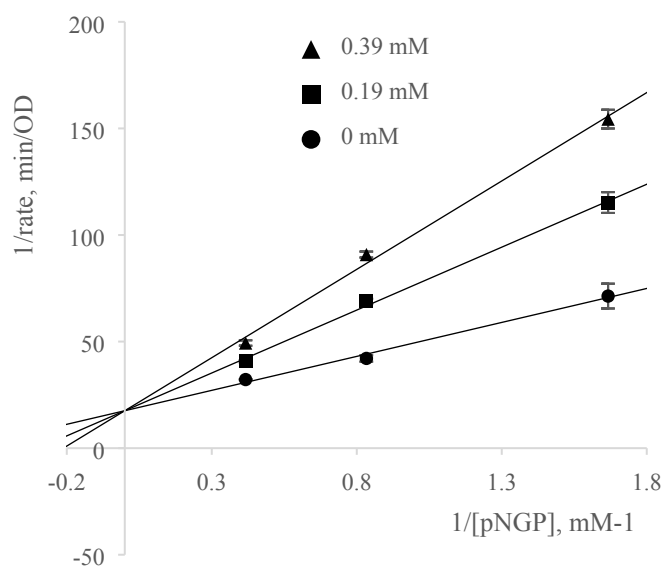

Fig. S1 Lineweaver-Burk plot of acarbose

## 7. Reference

1. Jin-Lin Zuo, Jia-Xiang Yang, Fu-ZhiWang, Xiang-Nan Dang, Jian-Liang Sun, De-Chun Zou, Yu-Peng Tian, Na Lin, Xu-Tang Tao, Min-Hua Jiang. *Journal of Photochemistry and Photobiology A: Chemistry*. **2008**, *199*, 322-329.
2. Barahman Movassagh, Sakineh Khosousi. *Monatshefte fuer Chemie*. **2012**, *143*, 1503-1506.

## 8. Spectra Data

Spectra data are shown from the next page.

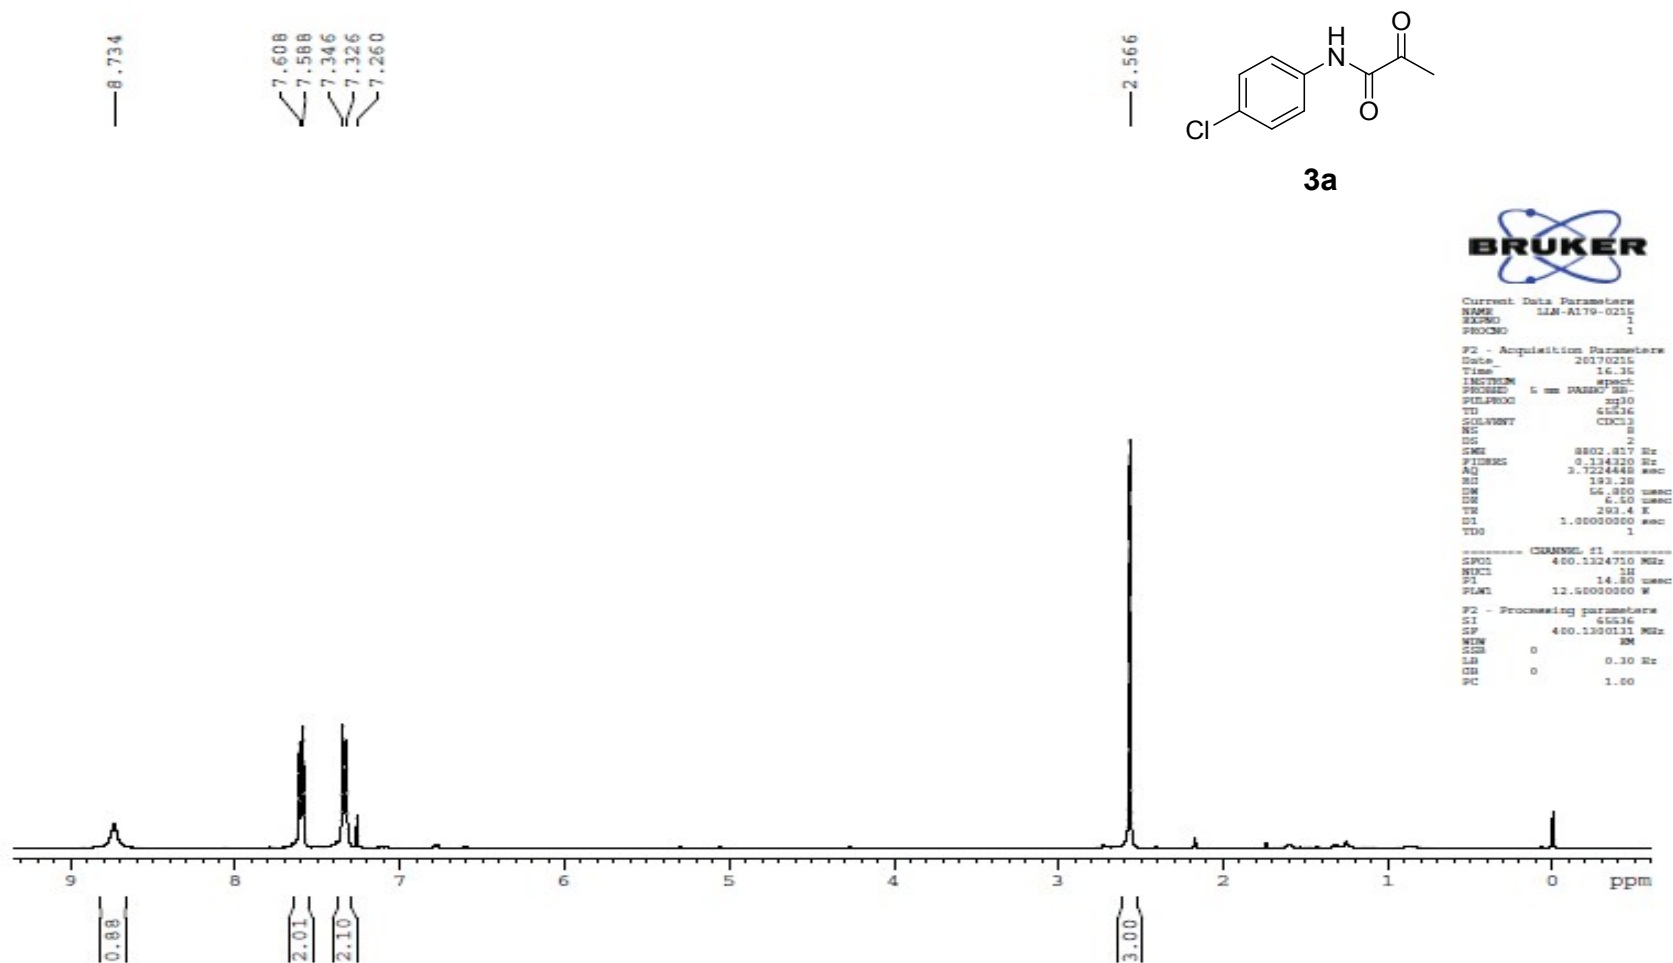

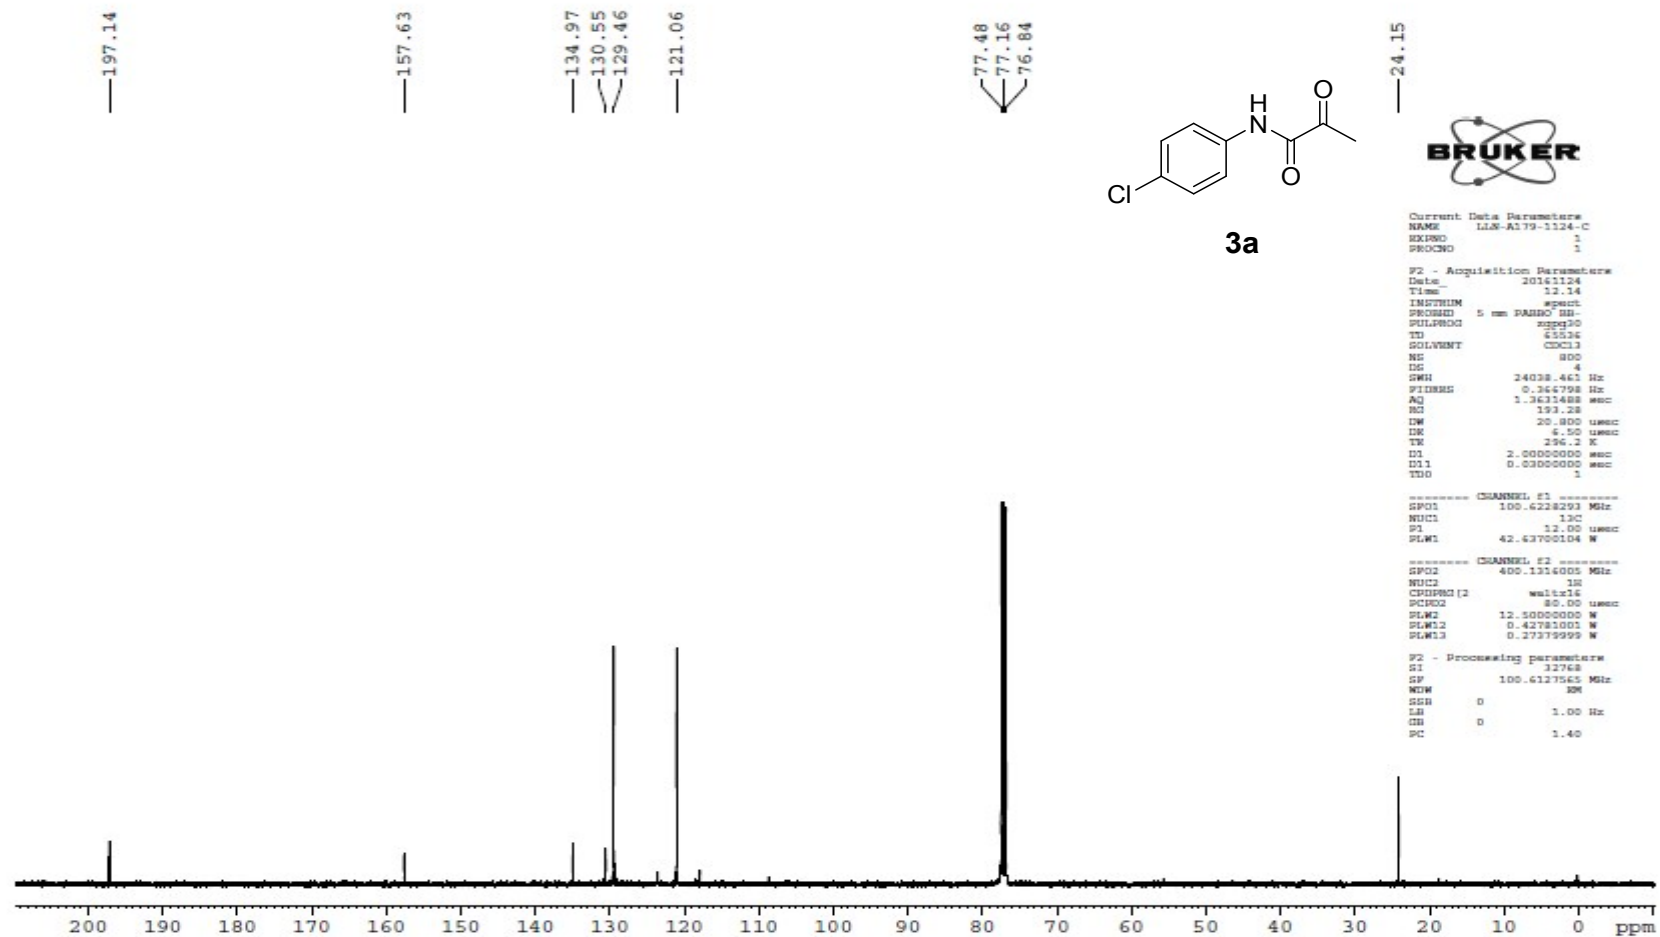

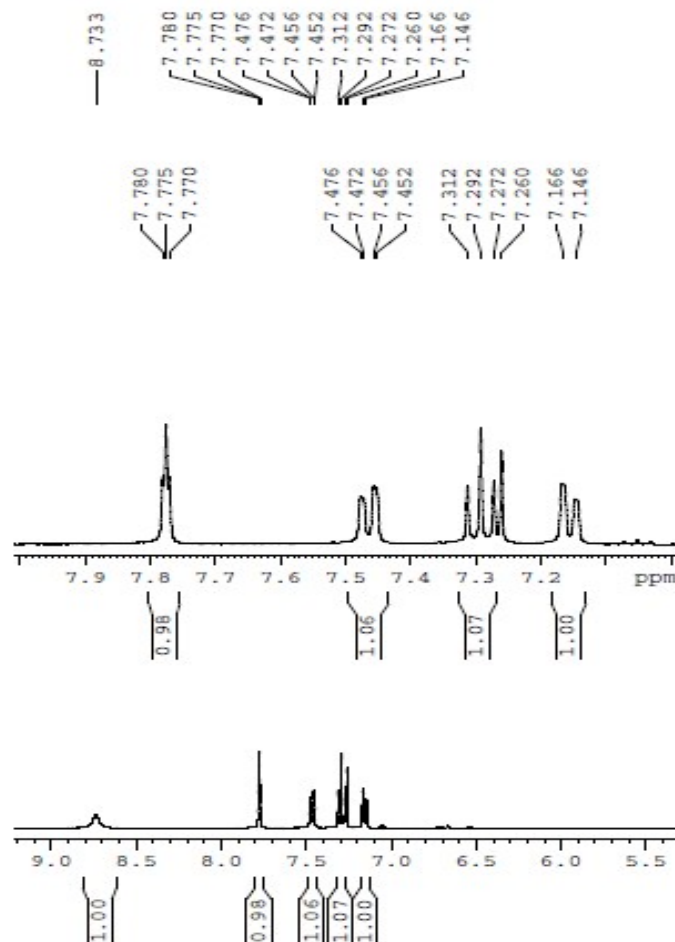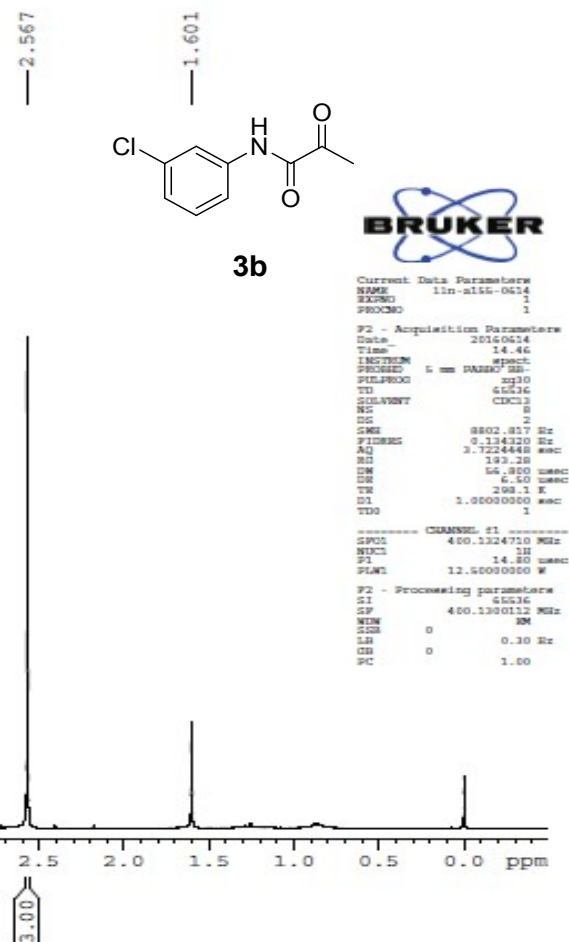



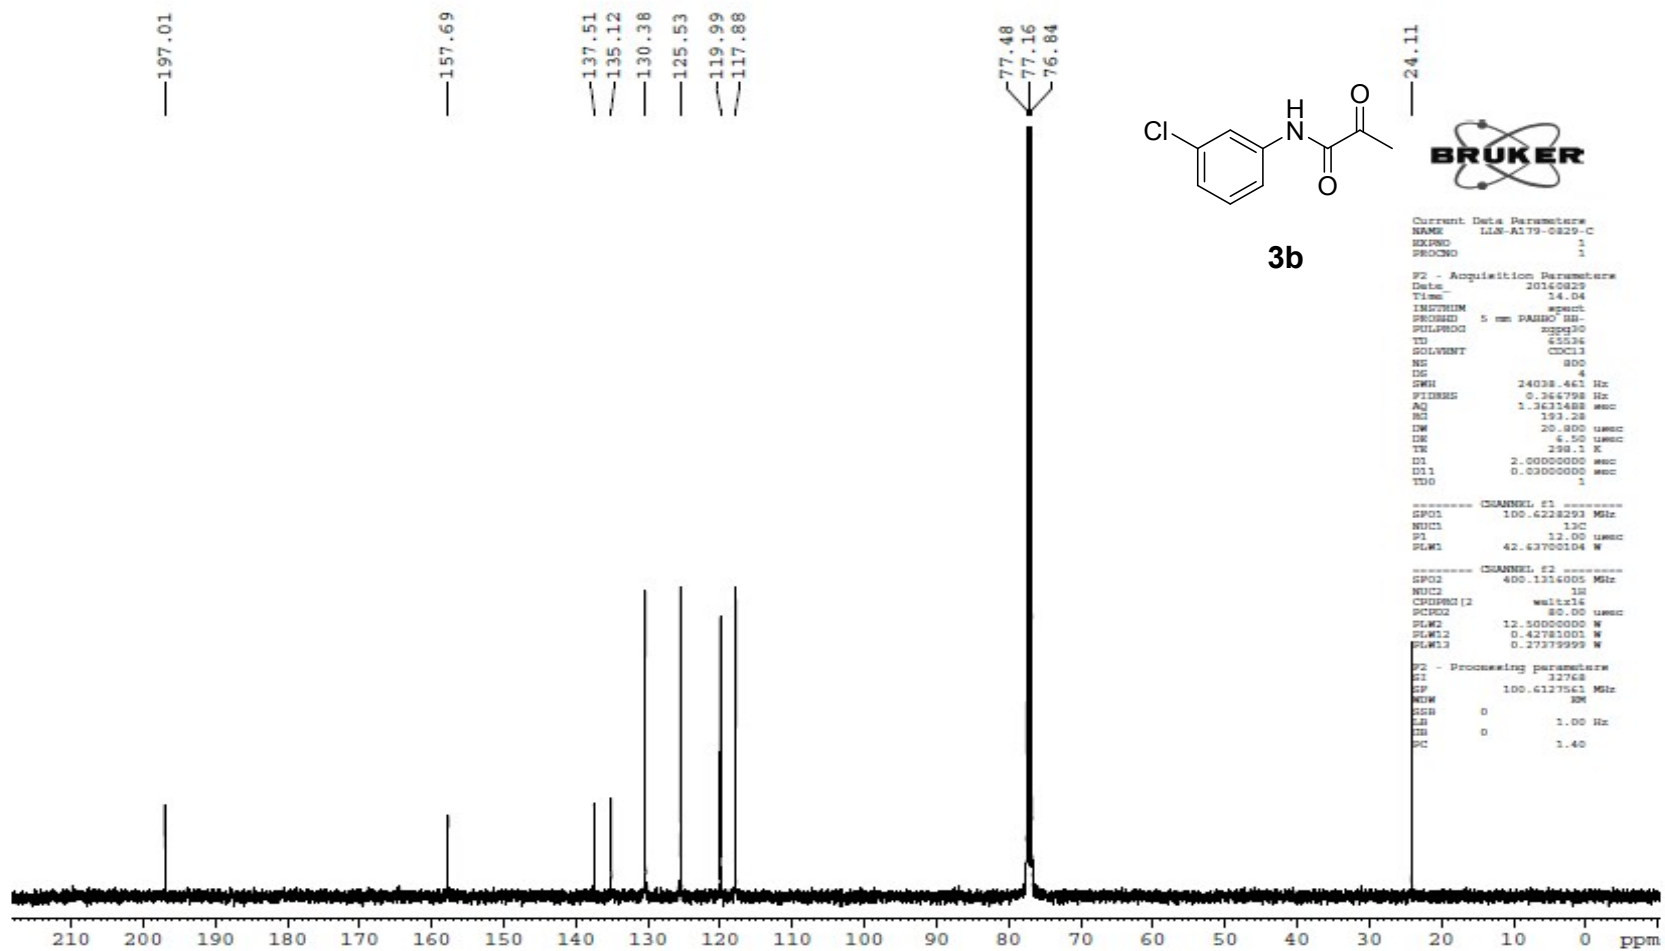

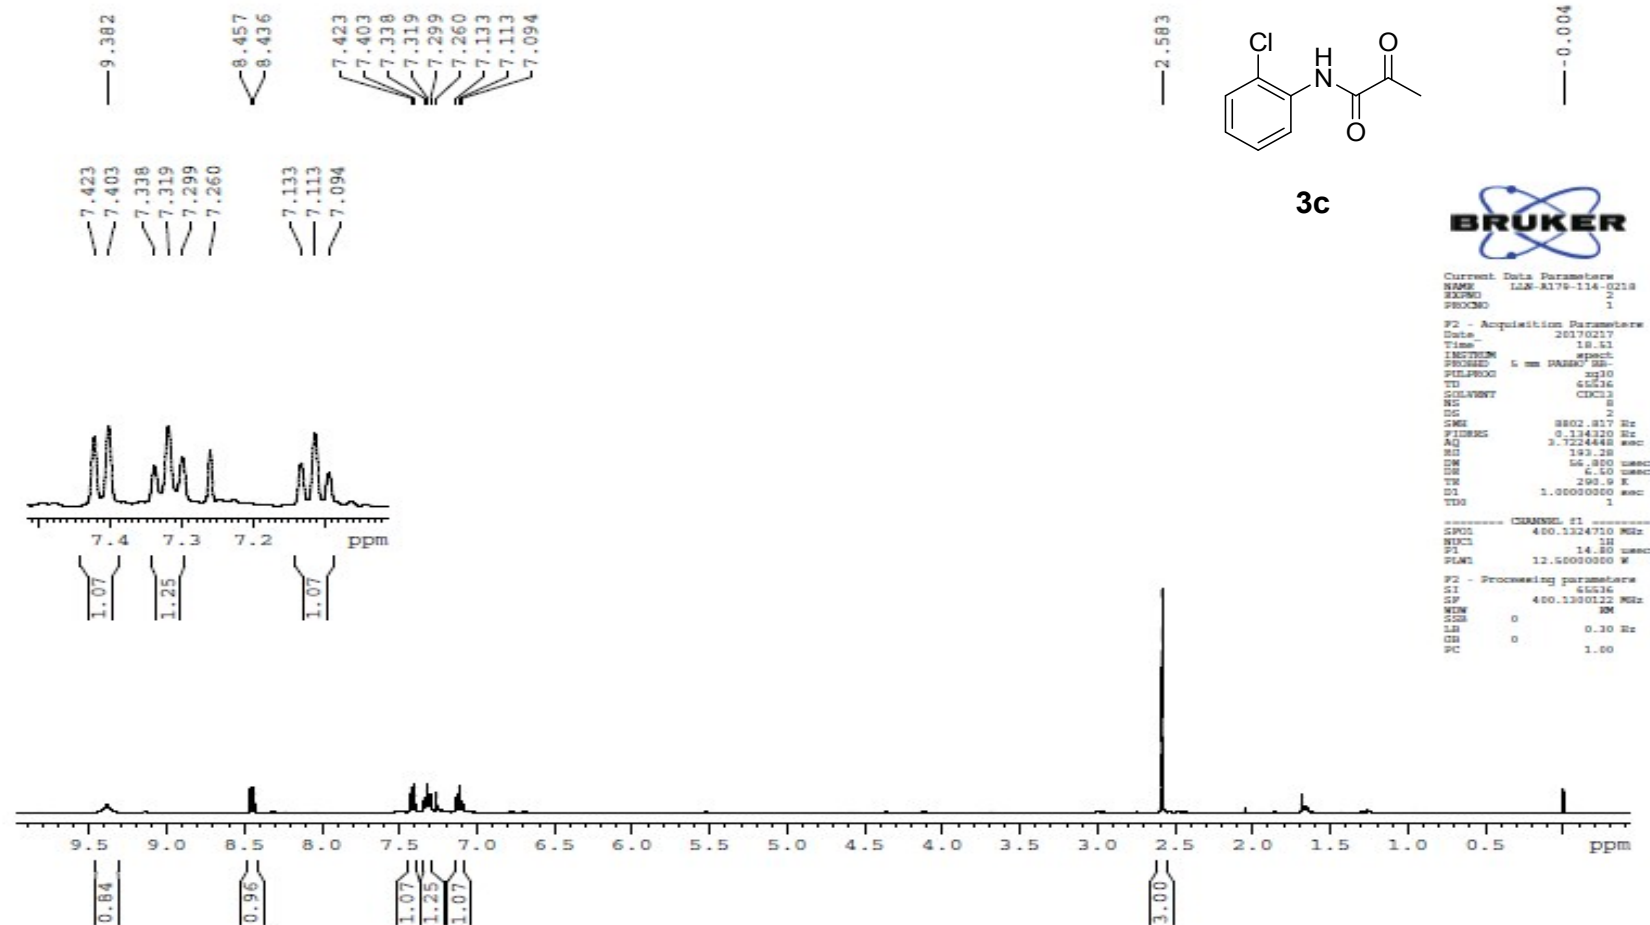

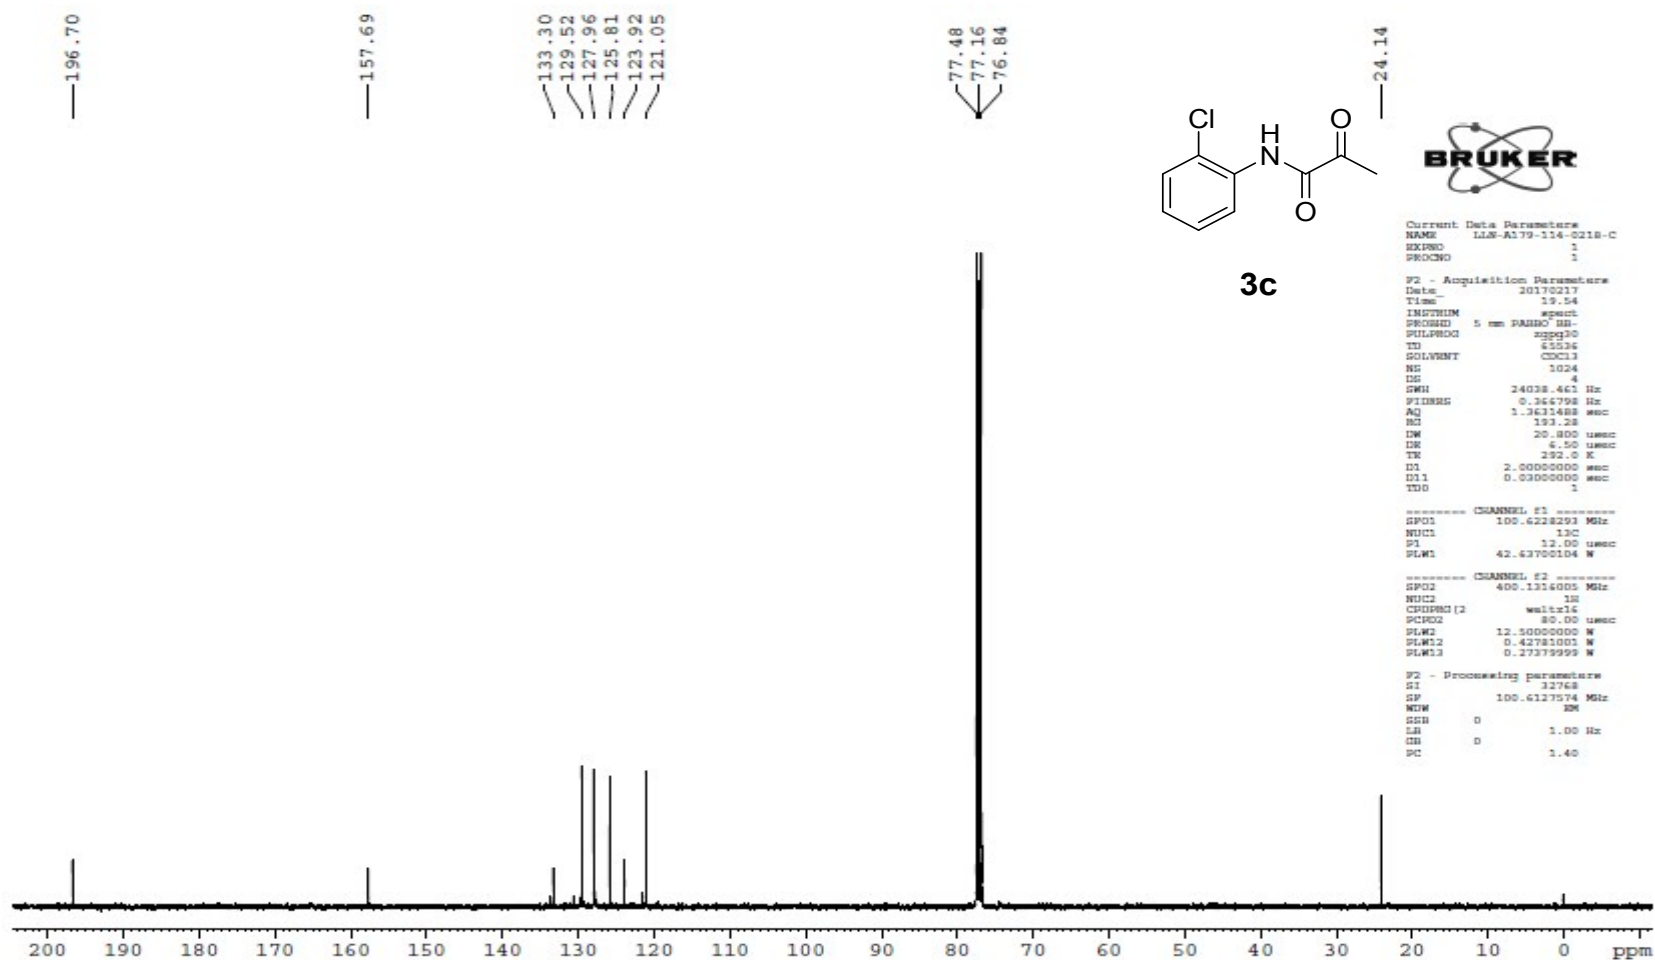

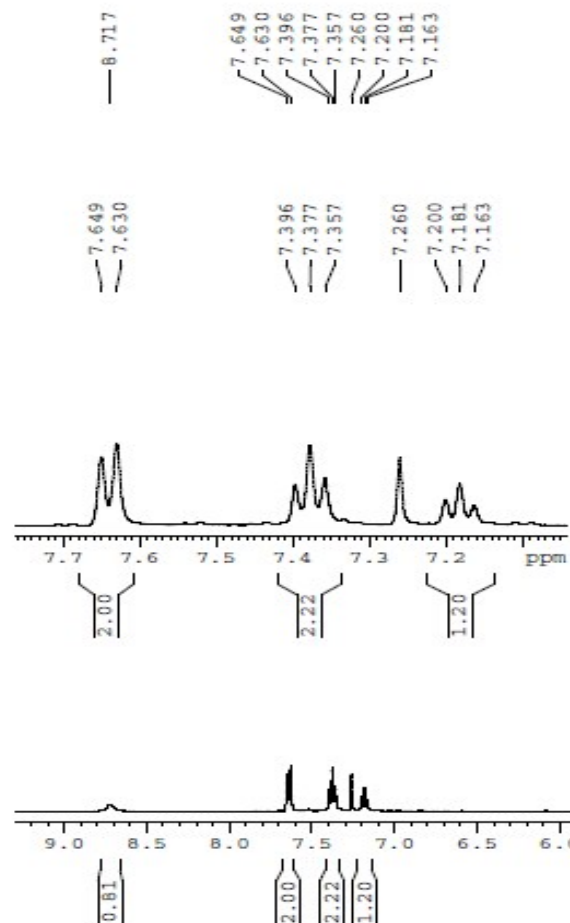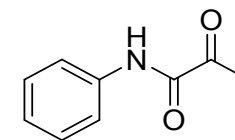

**3d**

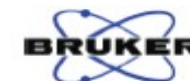

Current Data Parameters  
NAME LHM-A179-4c  
EXPNO 1  
PROCNO 1

F2 - Acquisition Parameters  
Date\_ 20161023  
Time 15.12  
INSTRUM spect  
PROBHD 5 mm PABBO/BB-  
PULPROG zgpg30  
TD 65536  
SOLVENT CDCl3  
NS 8  
DS 2  
CONE 9802.937 Hz  
FIDRES 0.134230 Hz  
AQ 3.7224448 sec  
RG 193.38  
SW 55.950 usec  
DE 6.50 usec  
TE 296.2 K  
D1 1.0000000 sec  
TD0 1

----- CHANNEL f1 -----  
NUC1 400.1324710 MHz  
P1 14.80 usec  
PLW1 12.5000000 W

F2 - Processing parameters  
SI 65536  
SF 400.1330124 MHz  
WDW EM  
SSB 0  
LB 0.30 Hz  
GB 0  
PC 1.00

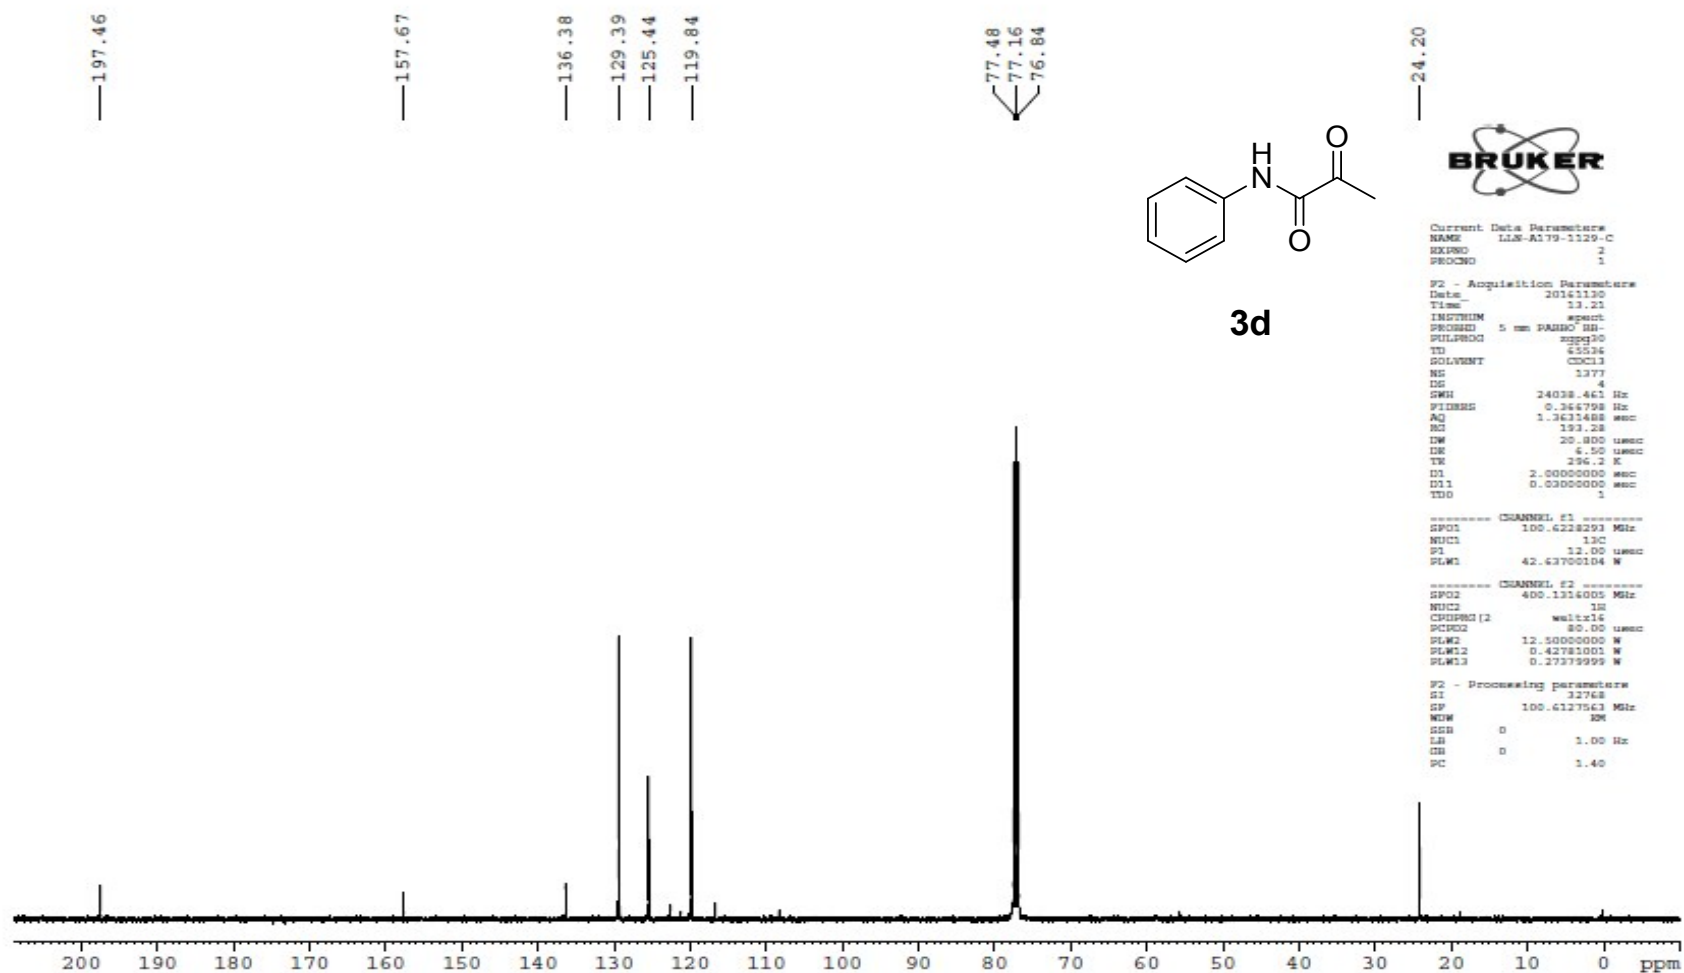

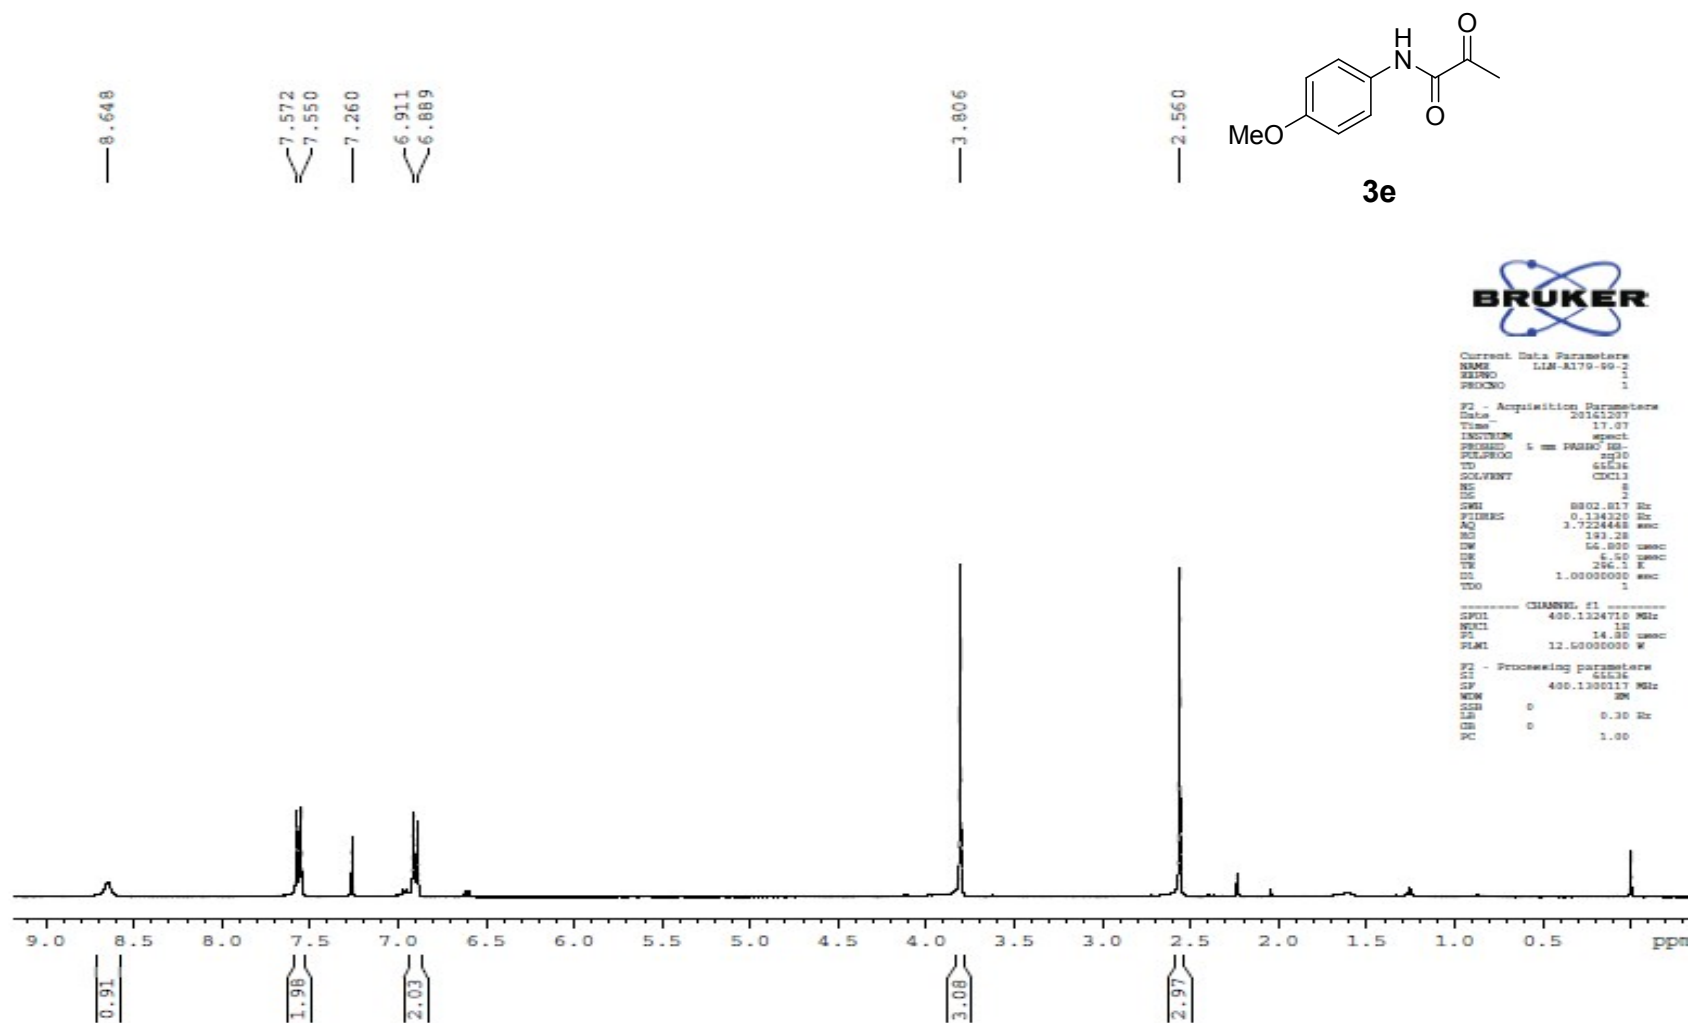

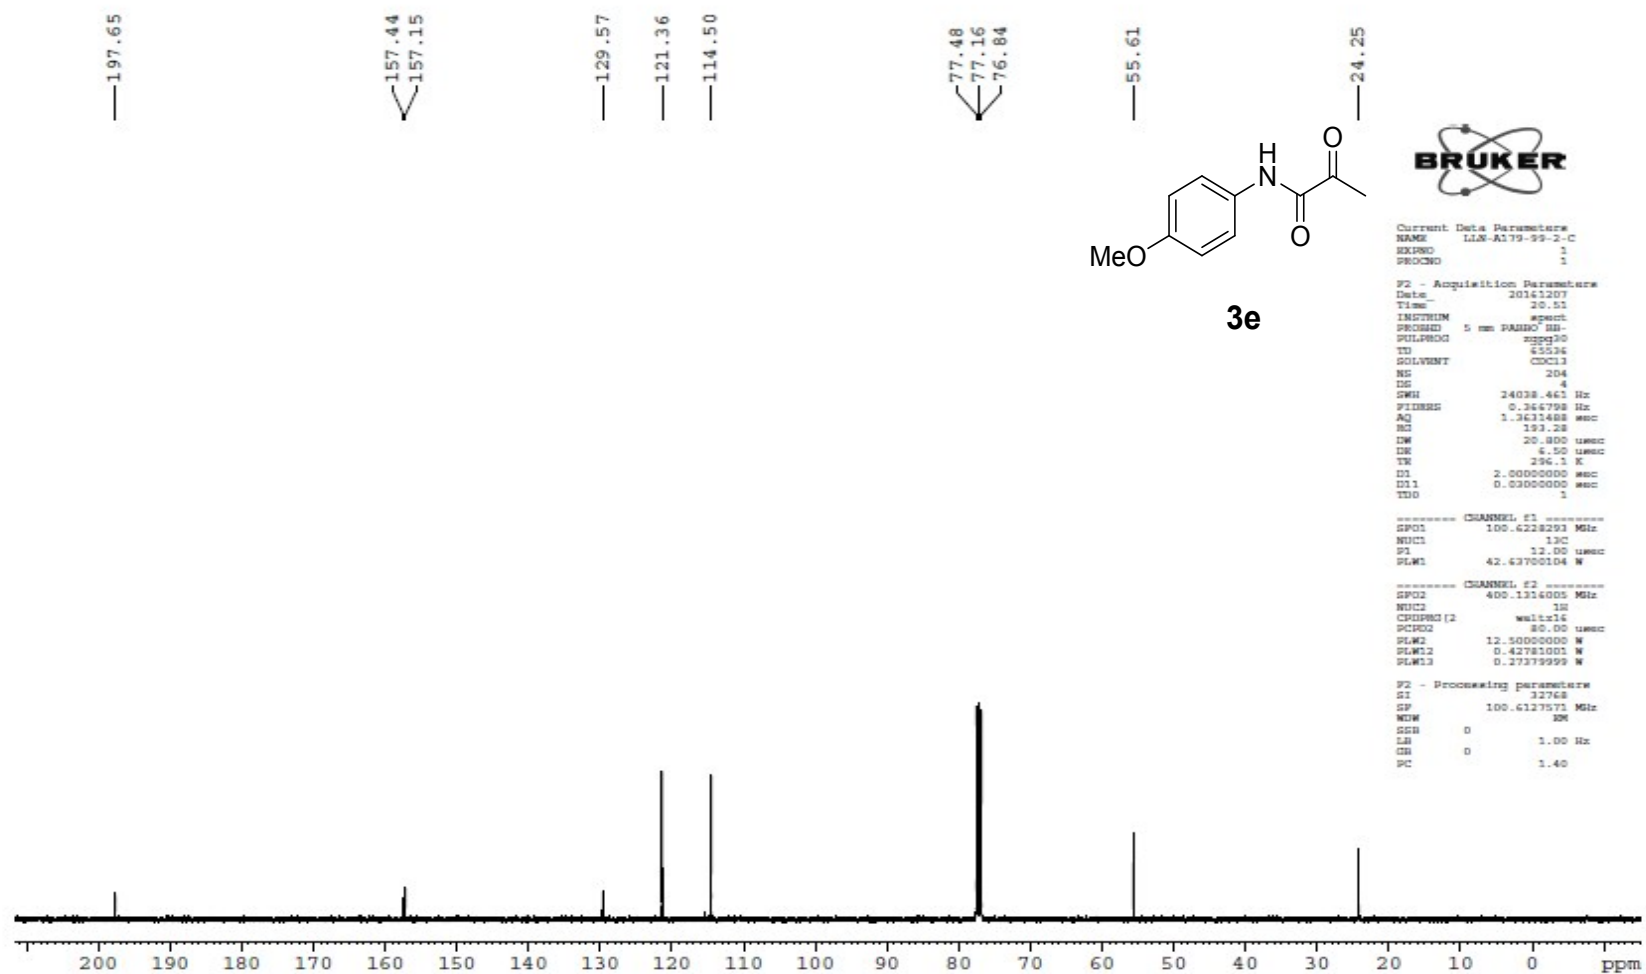

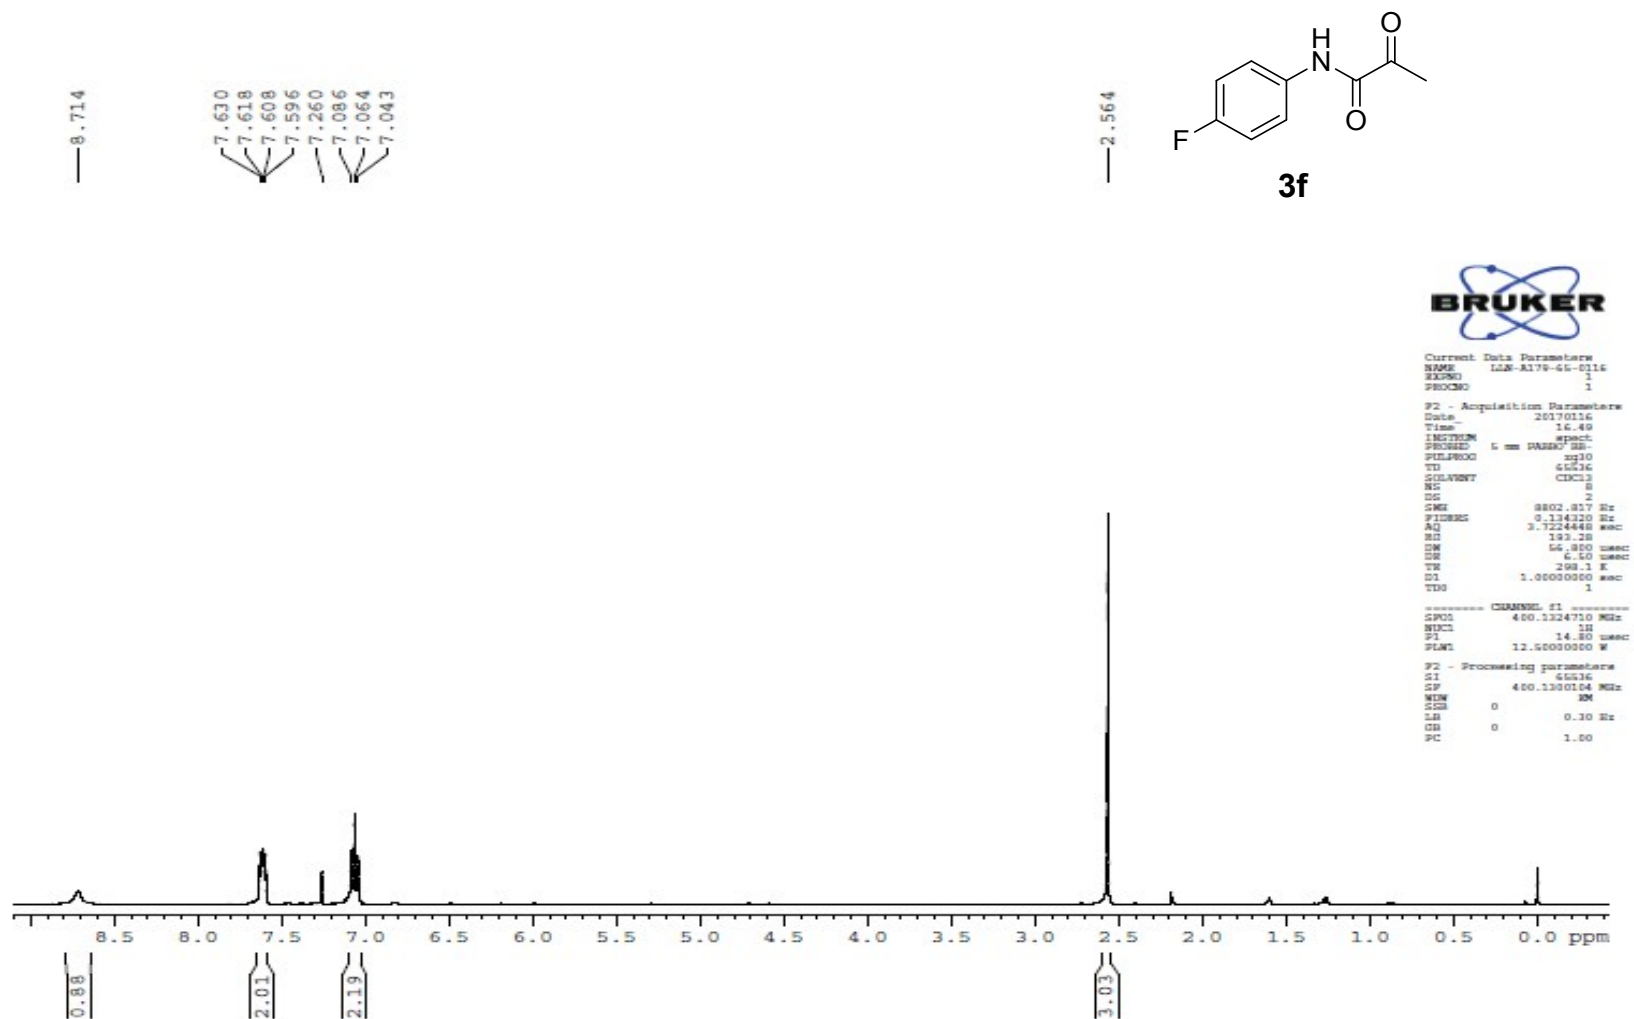



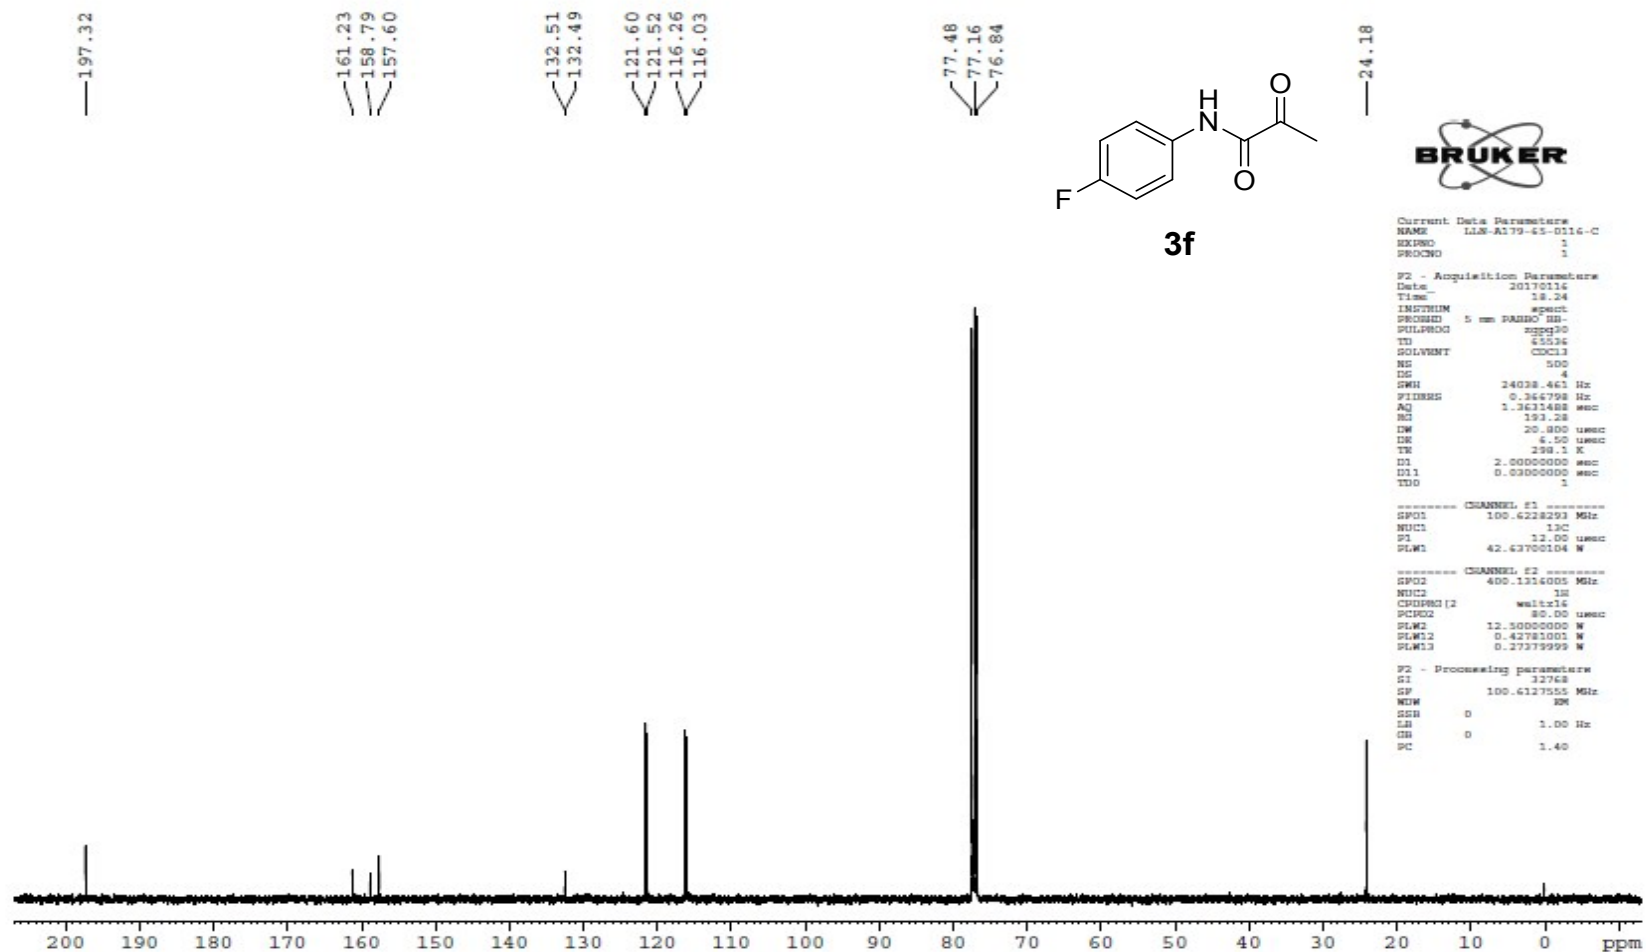

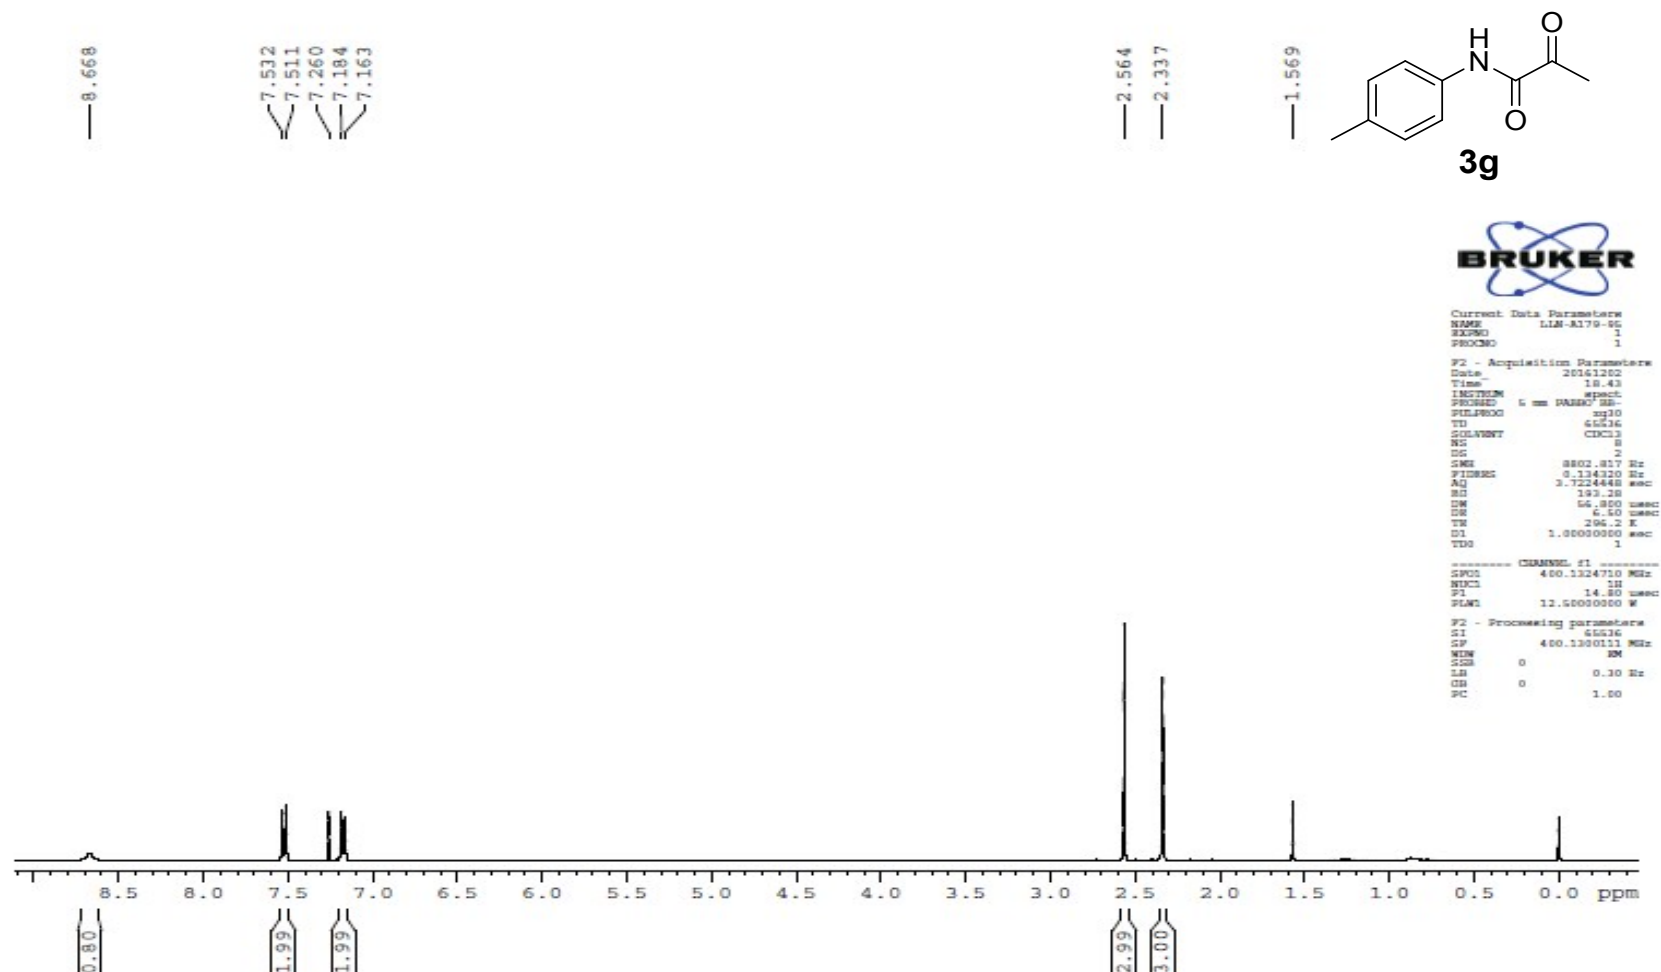

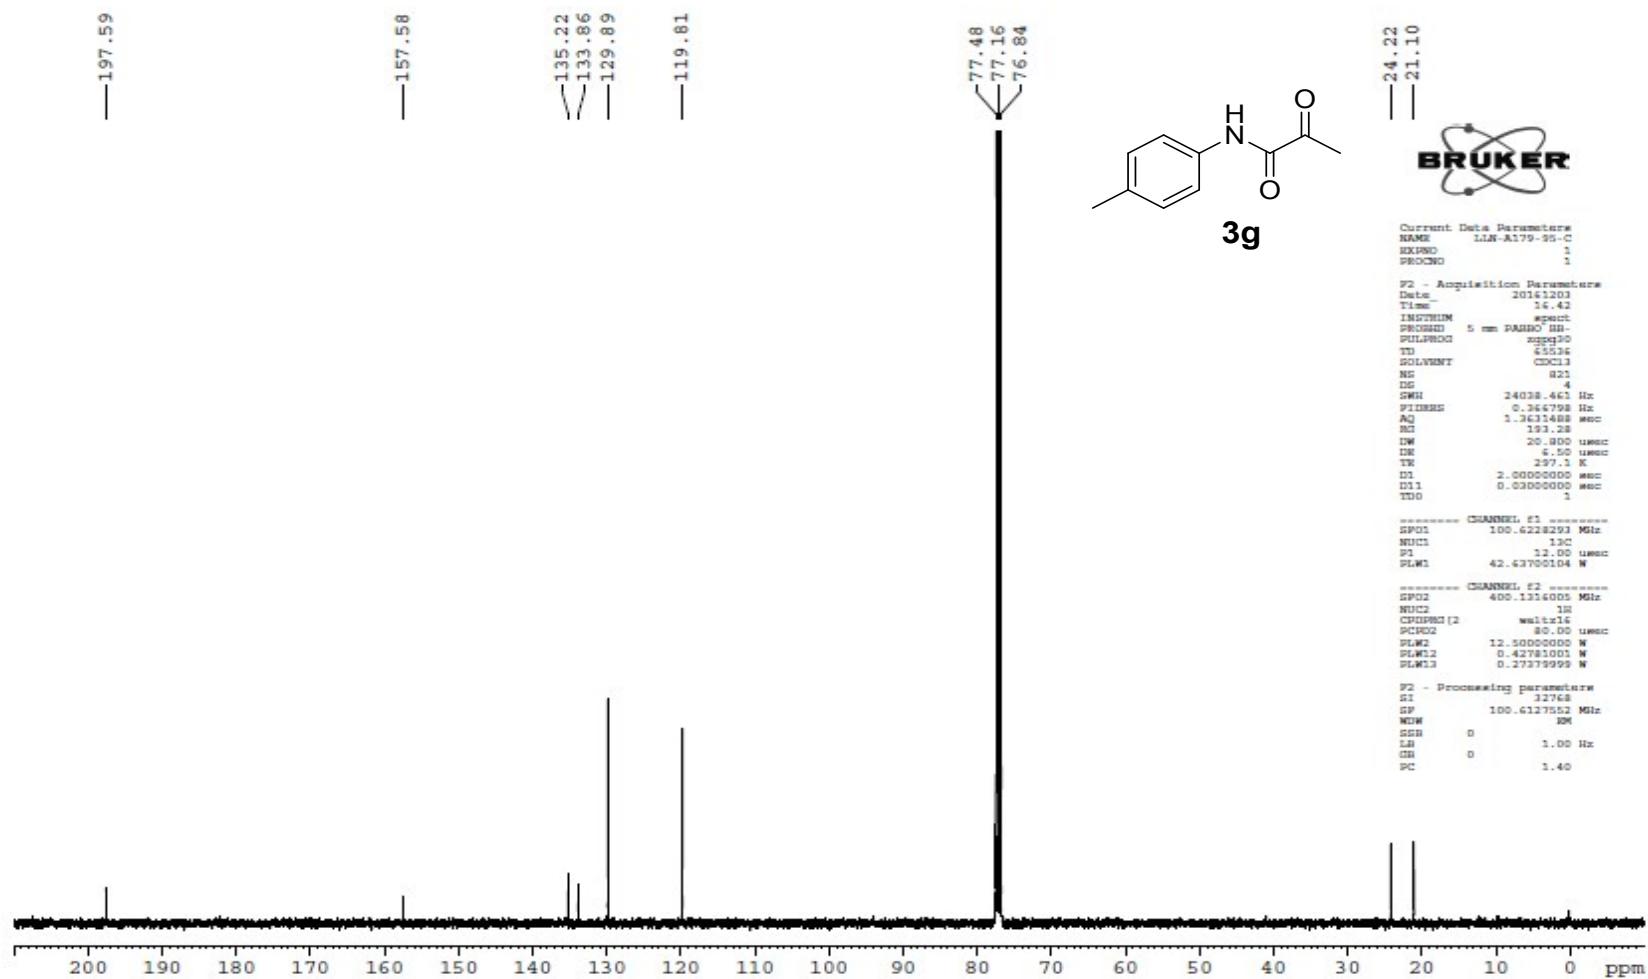

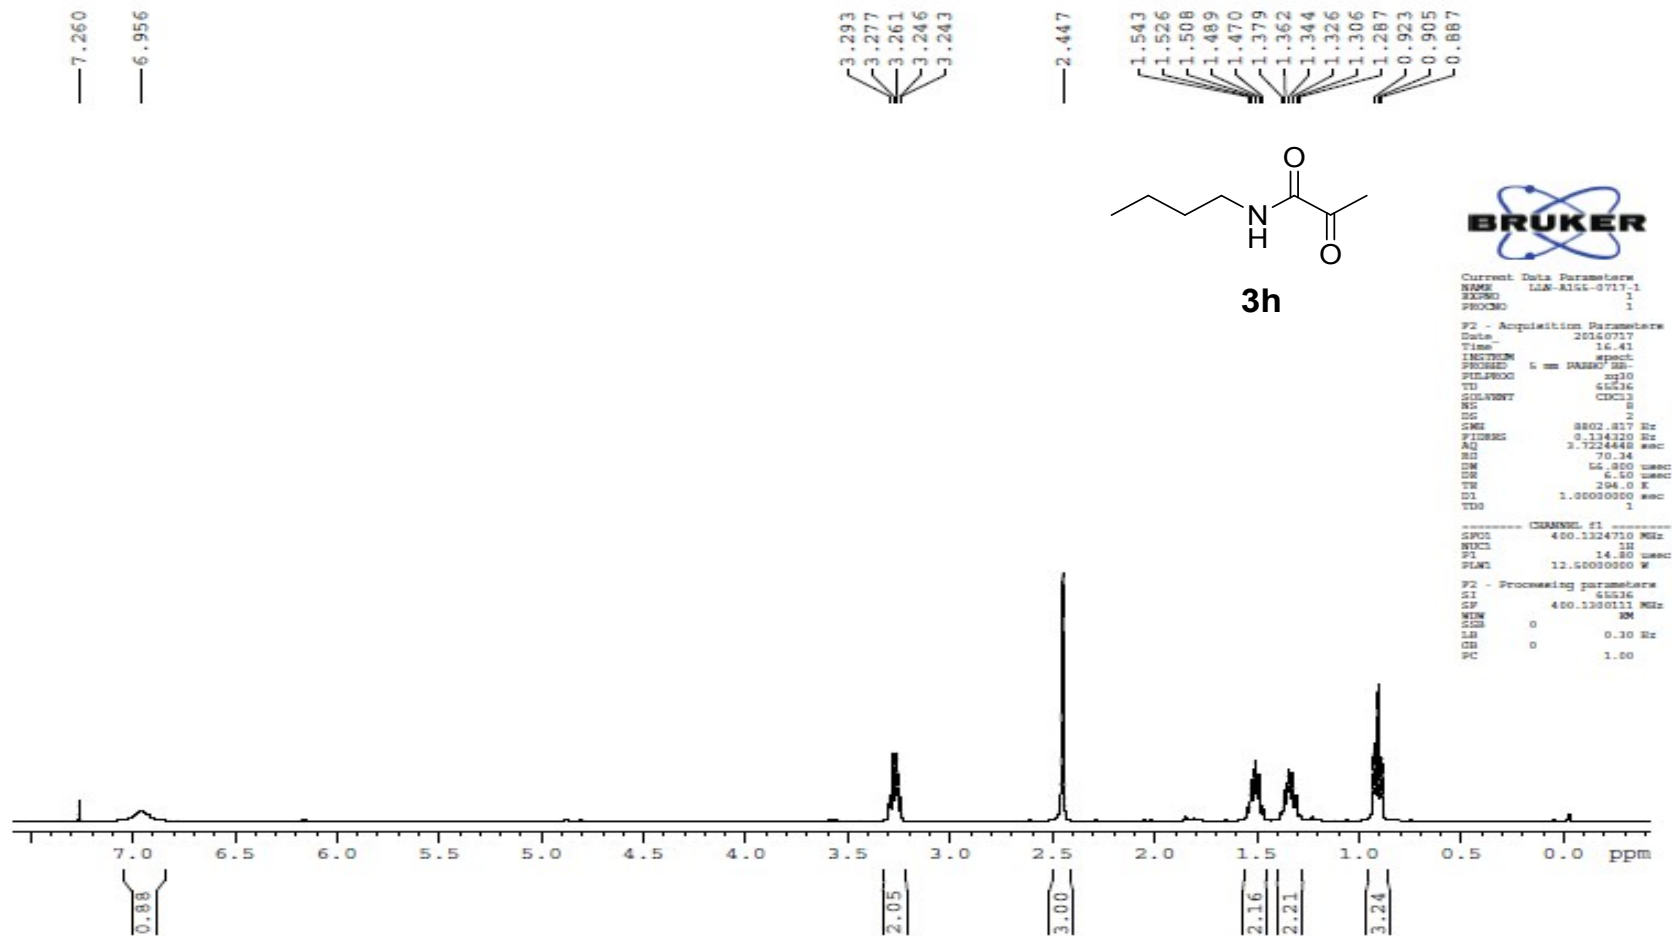

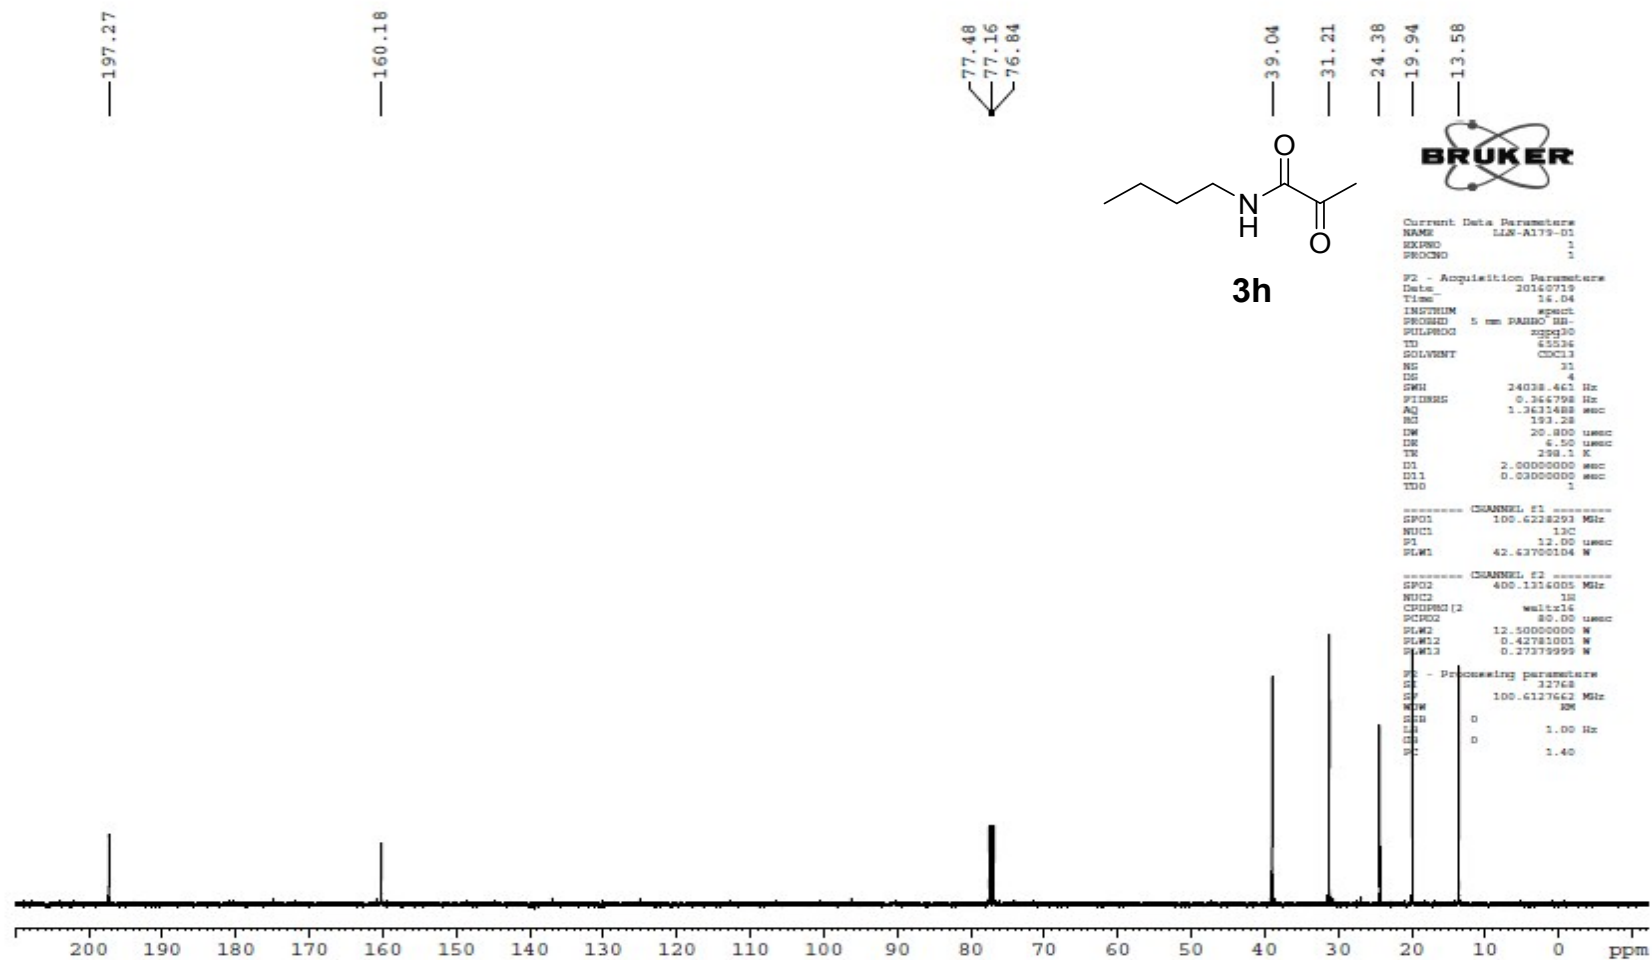

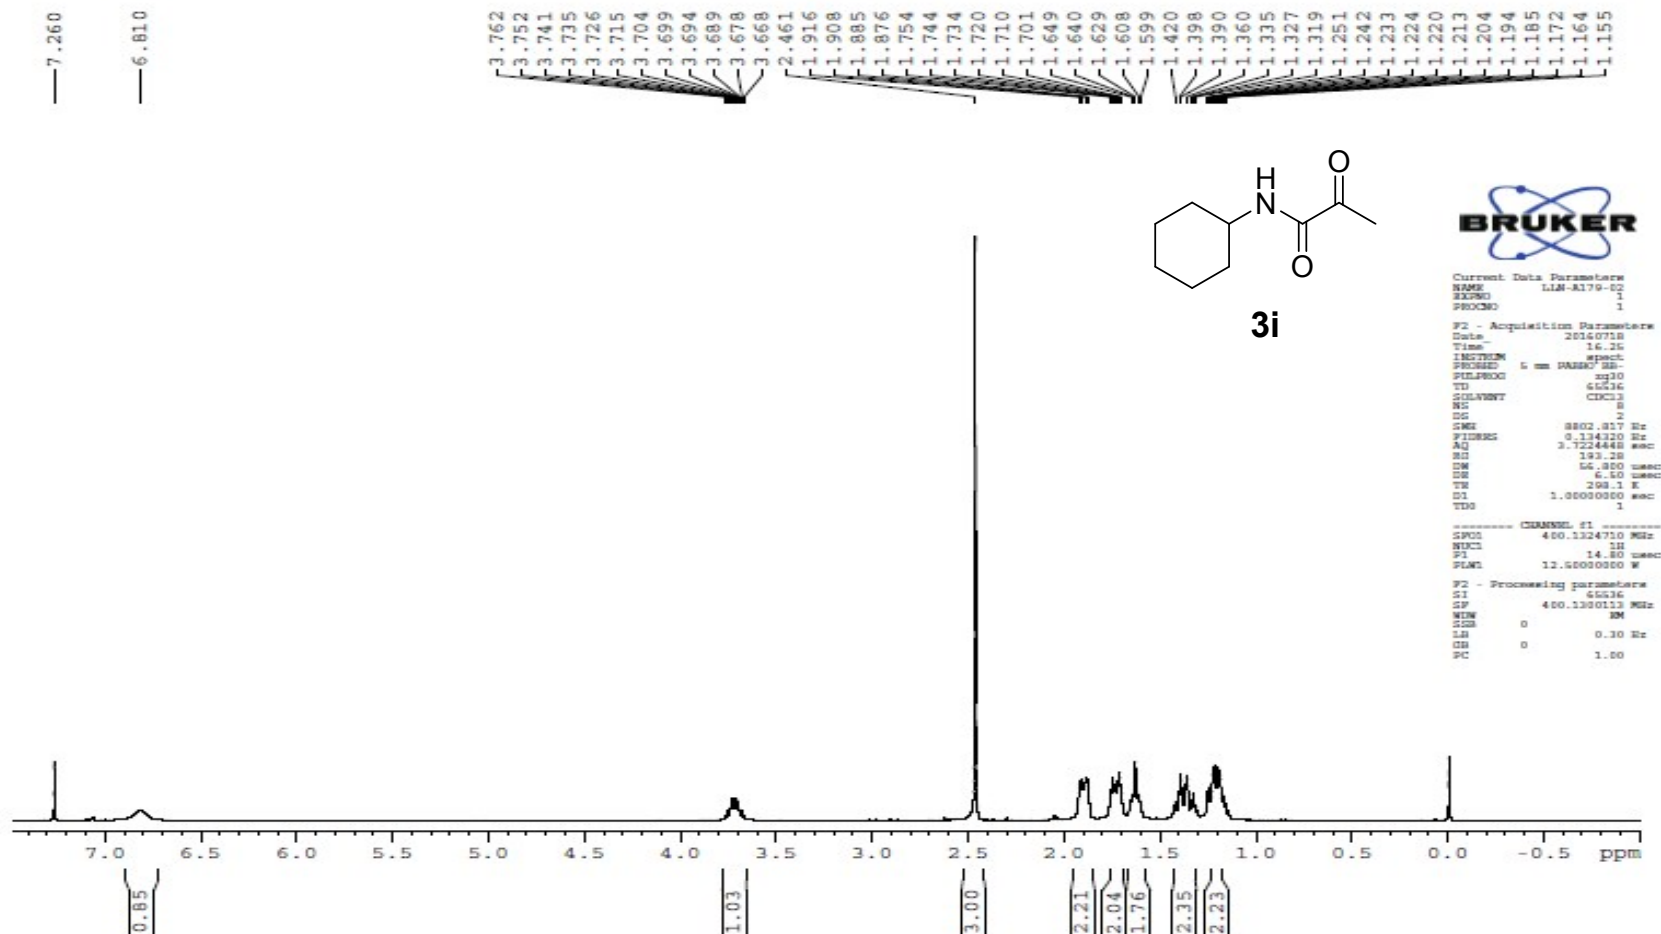

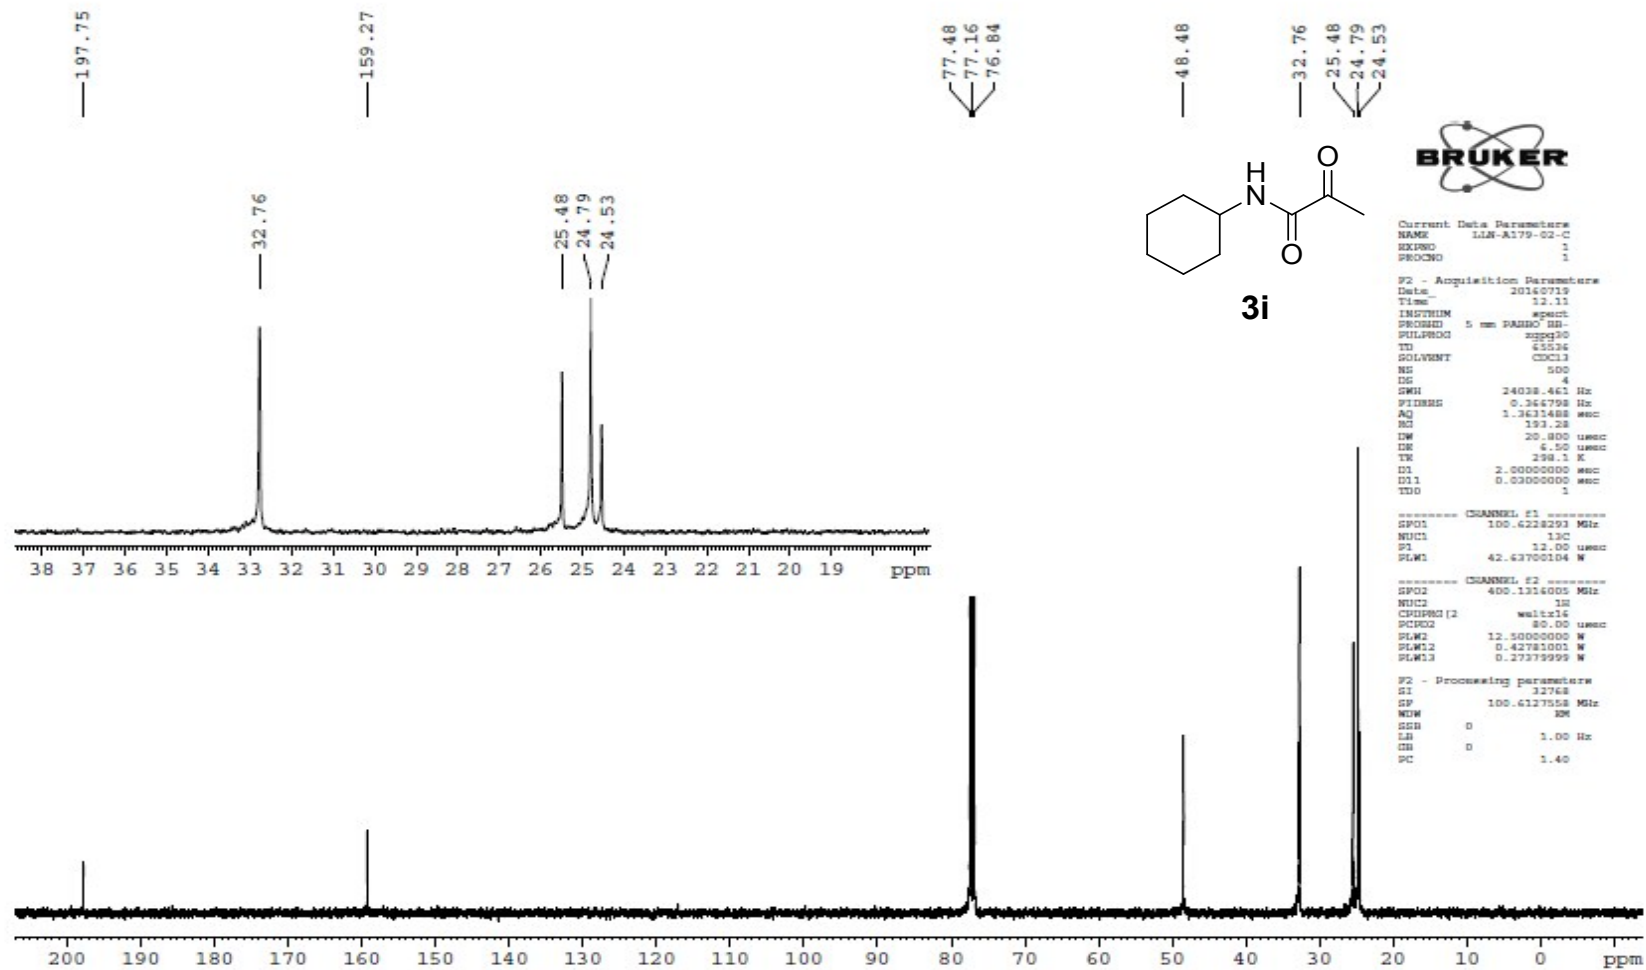

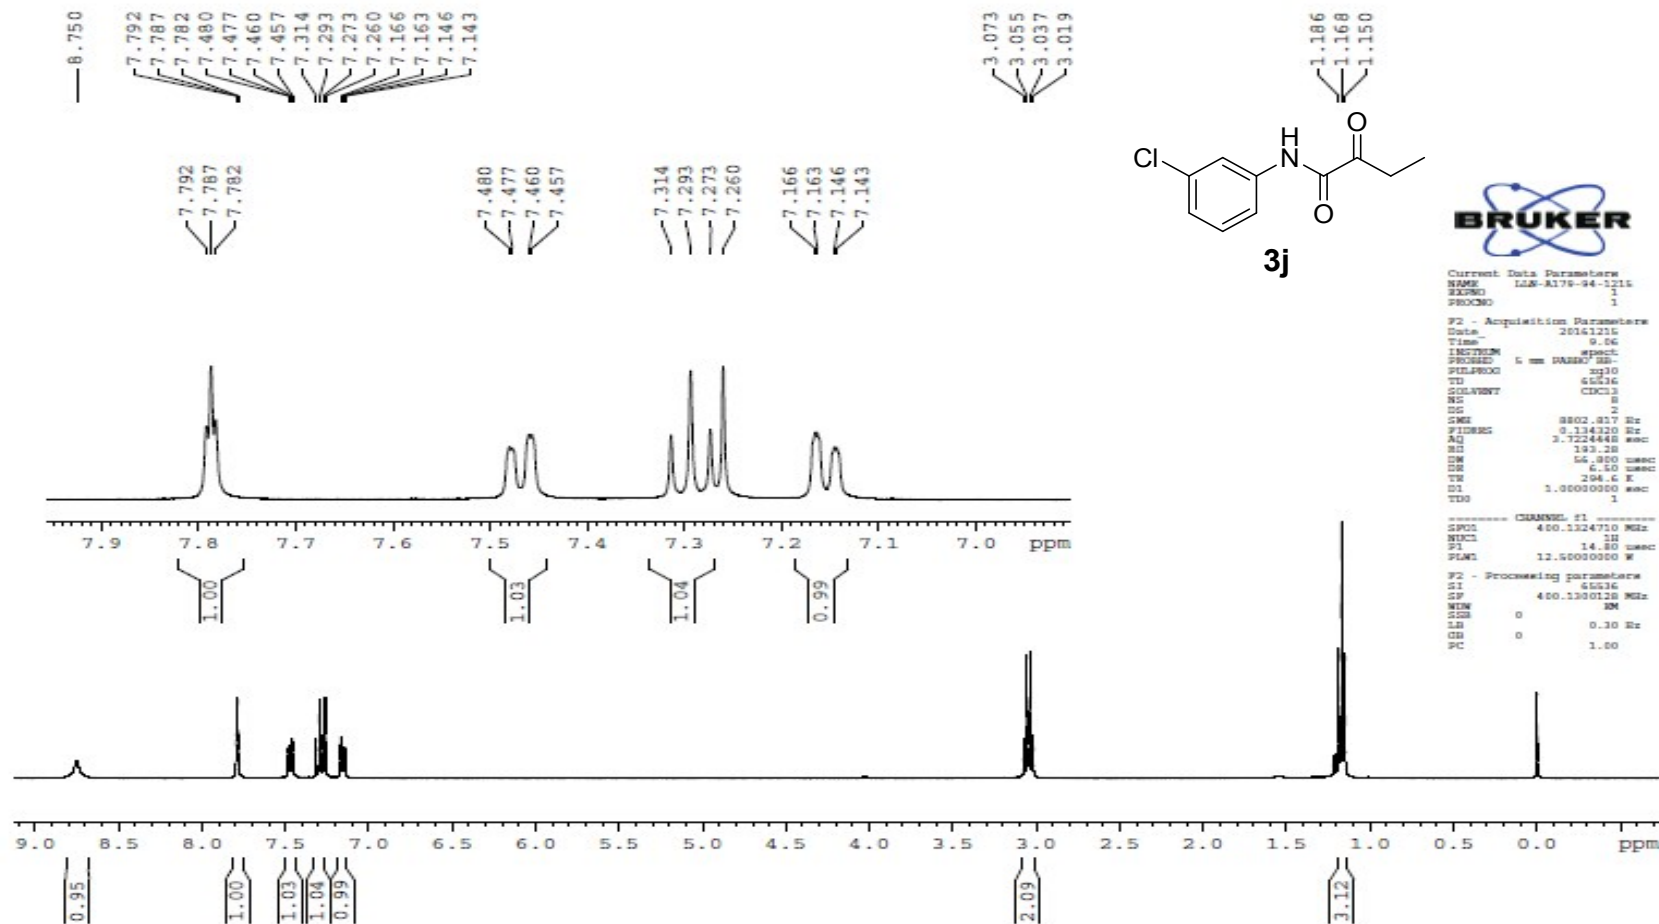



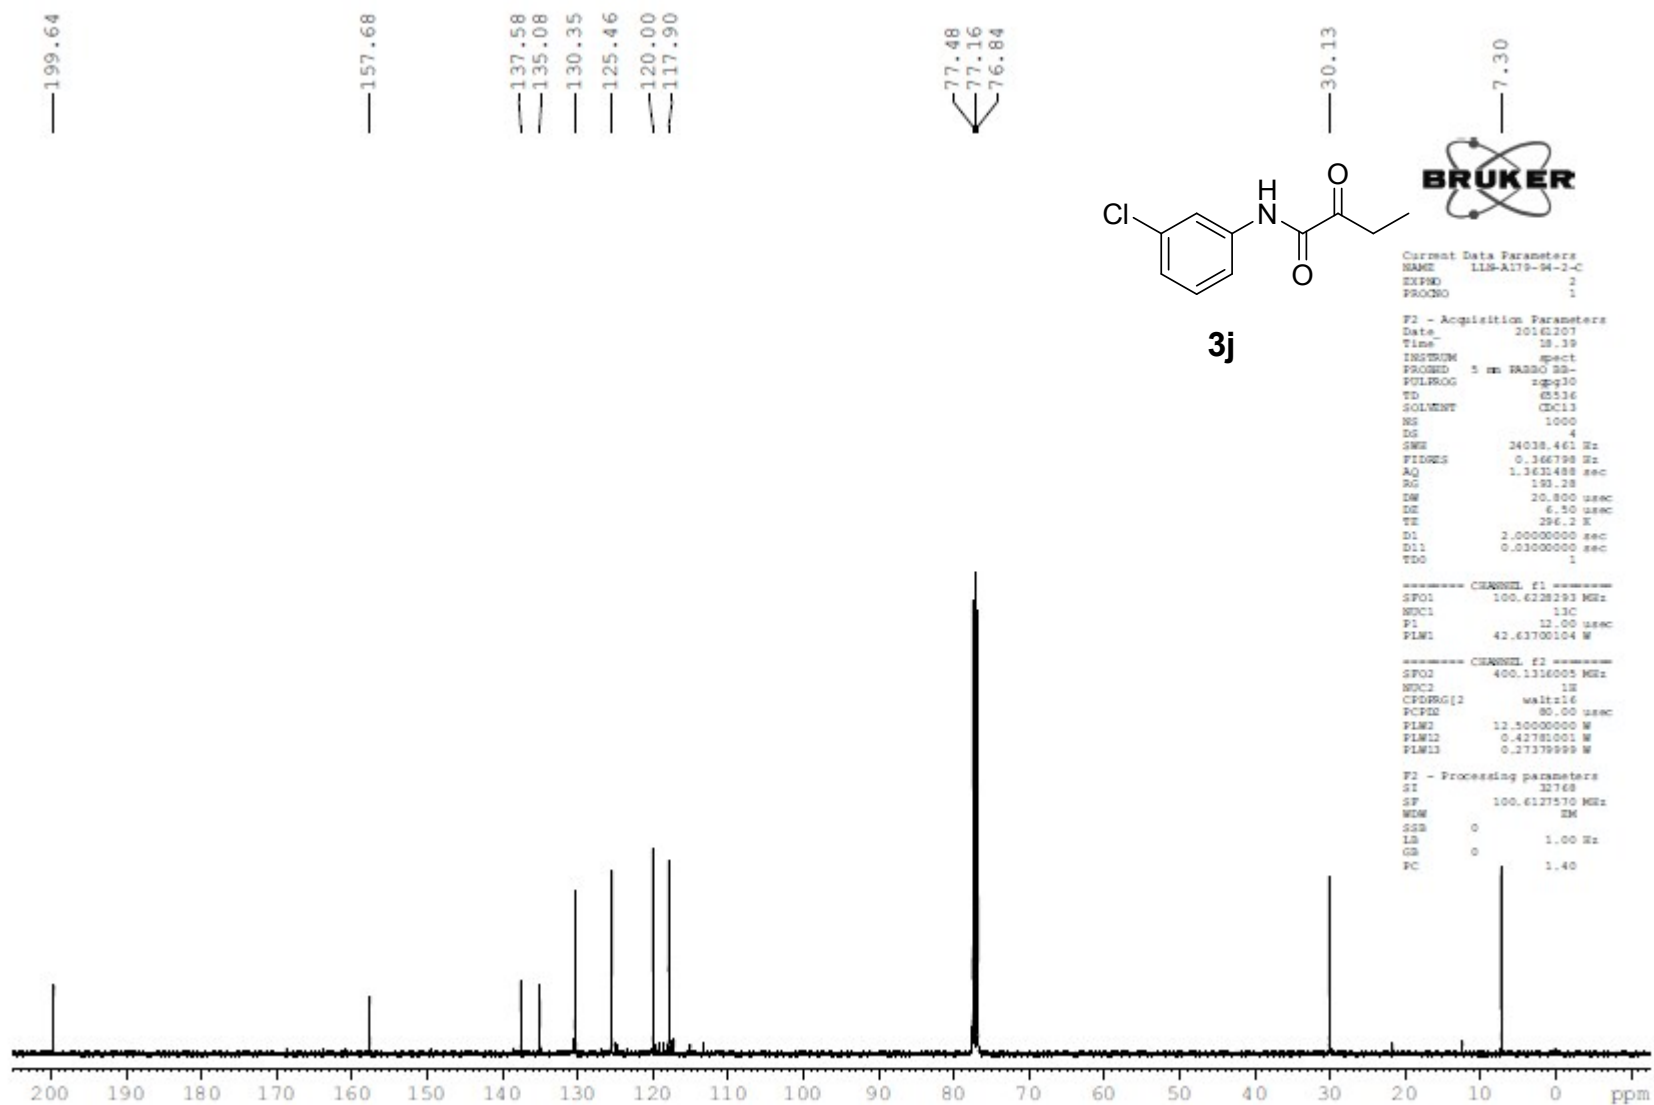

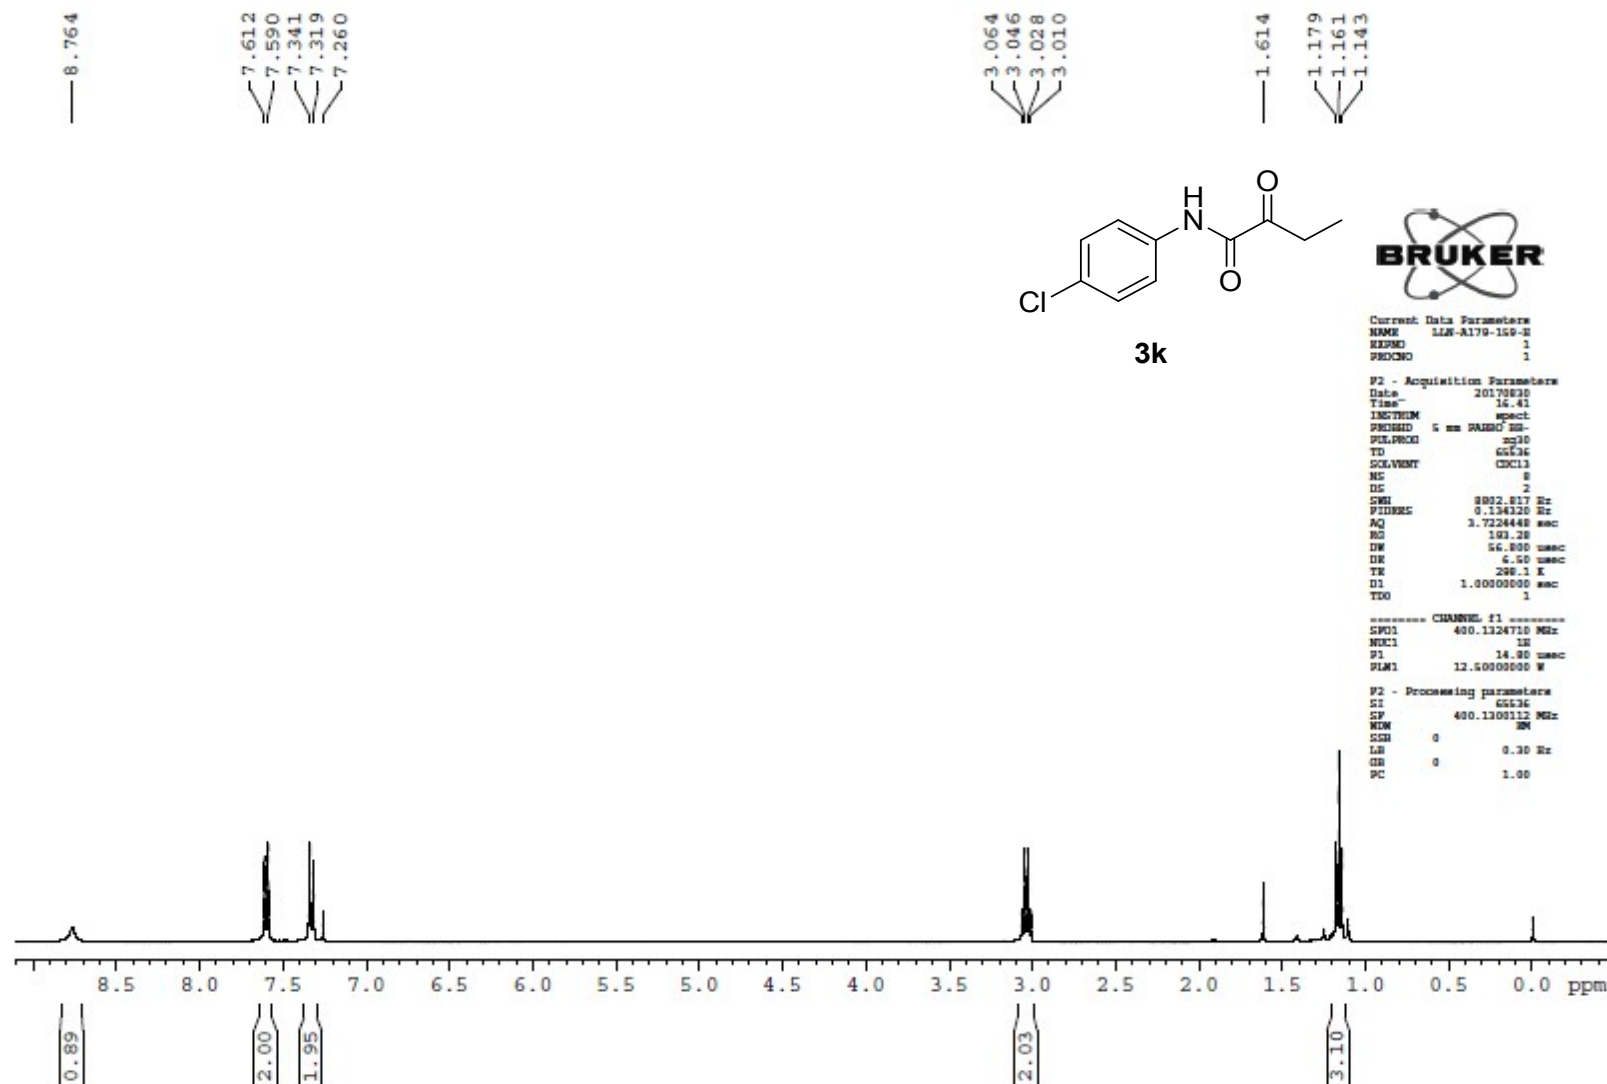

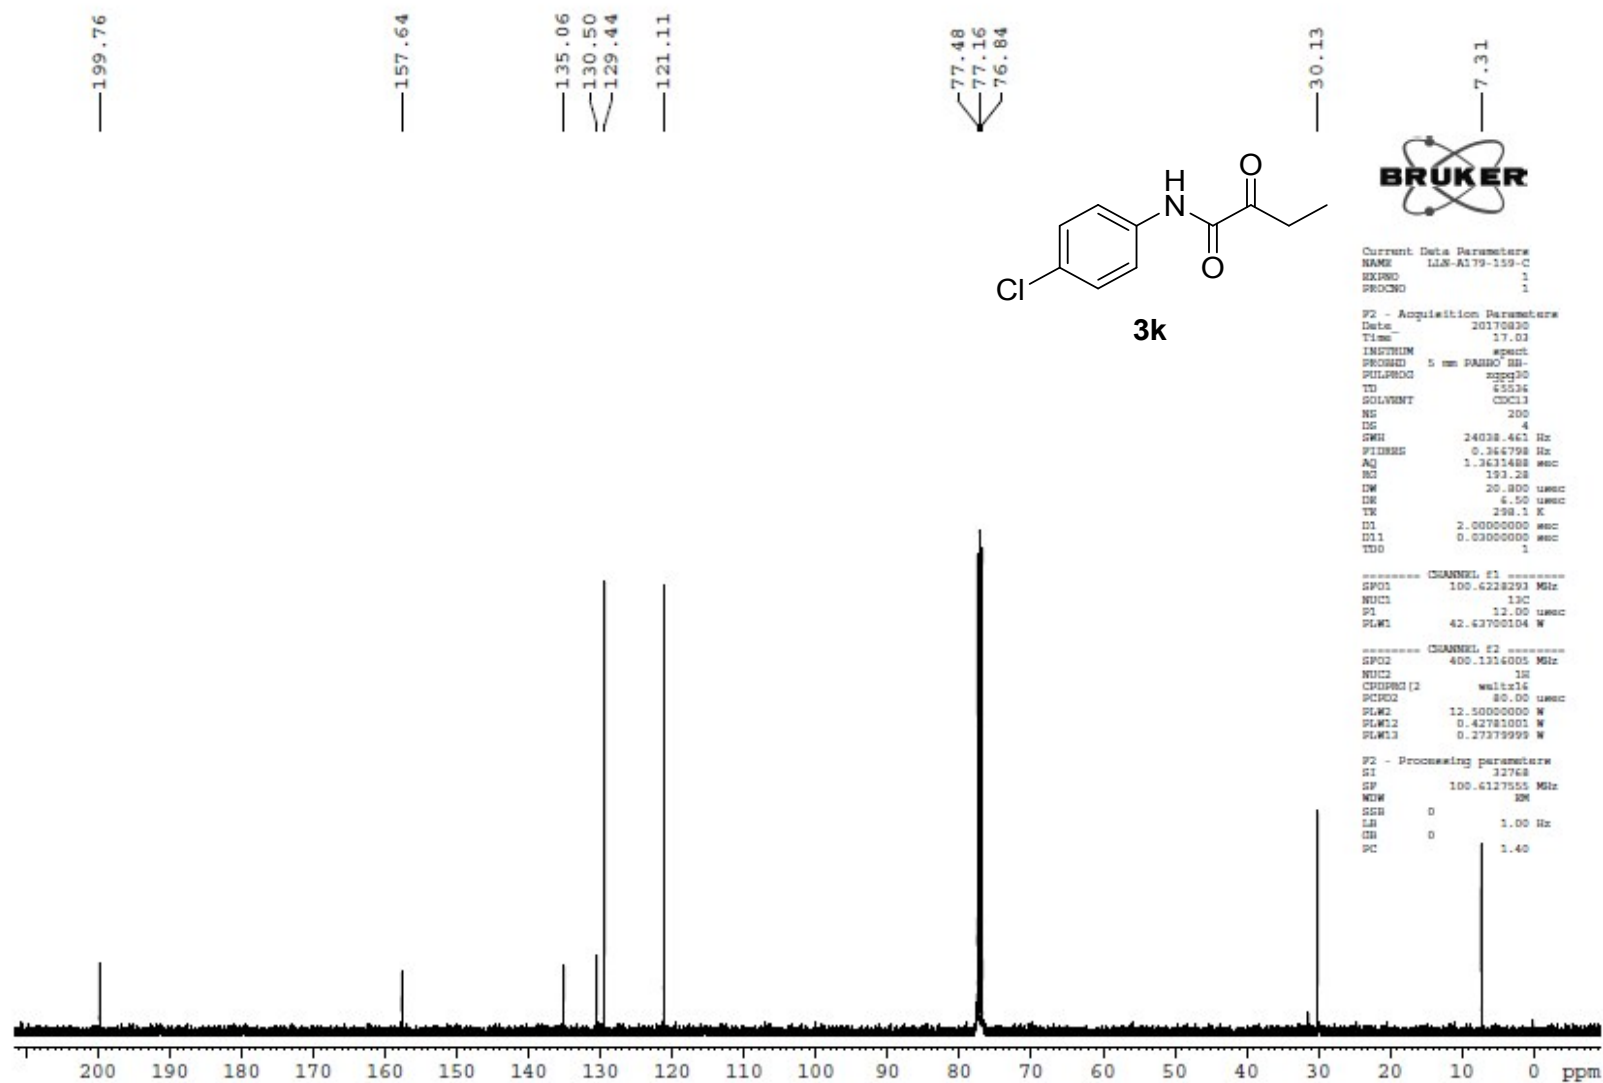

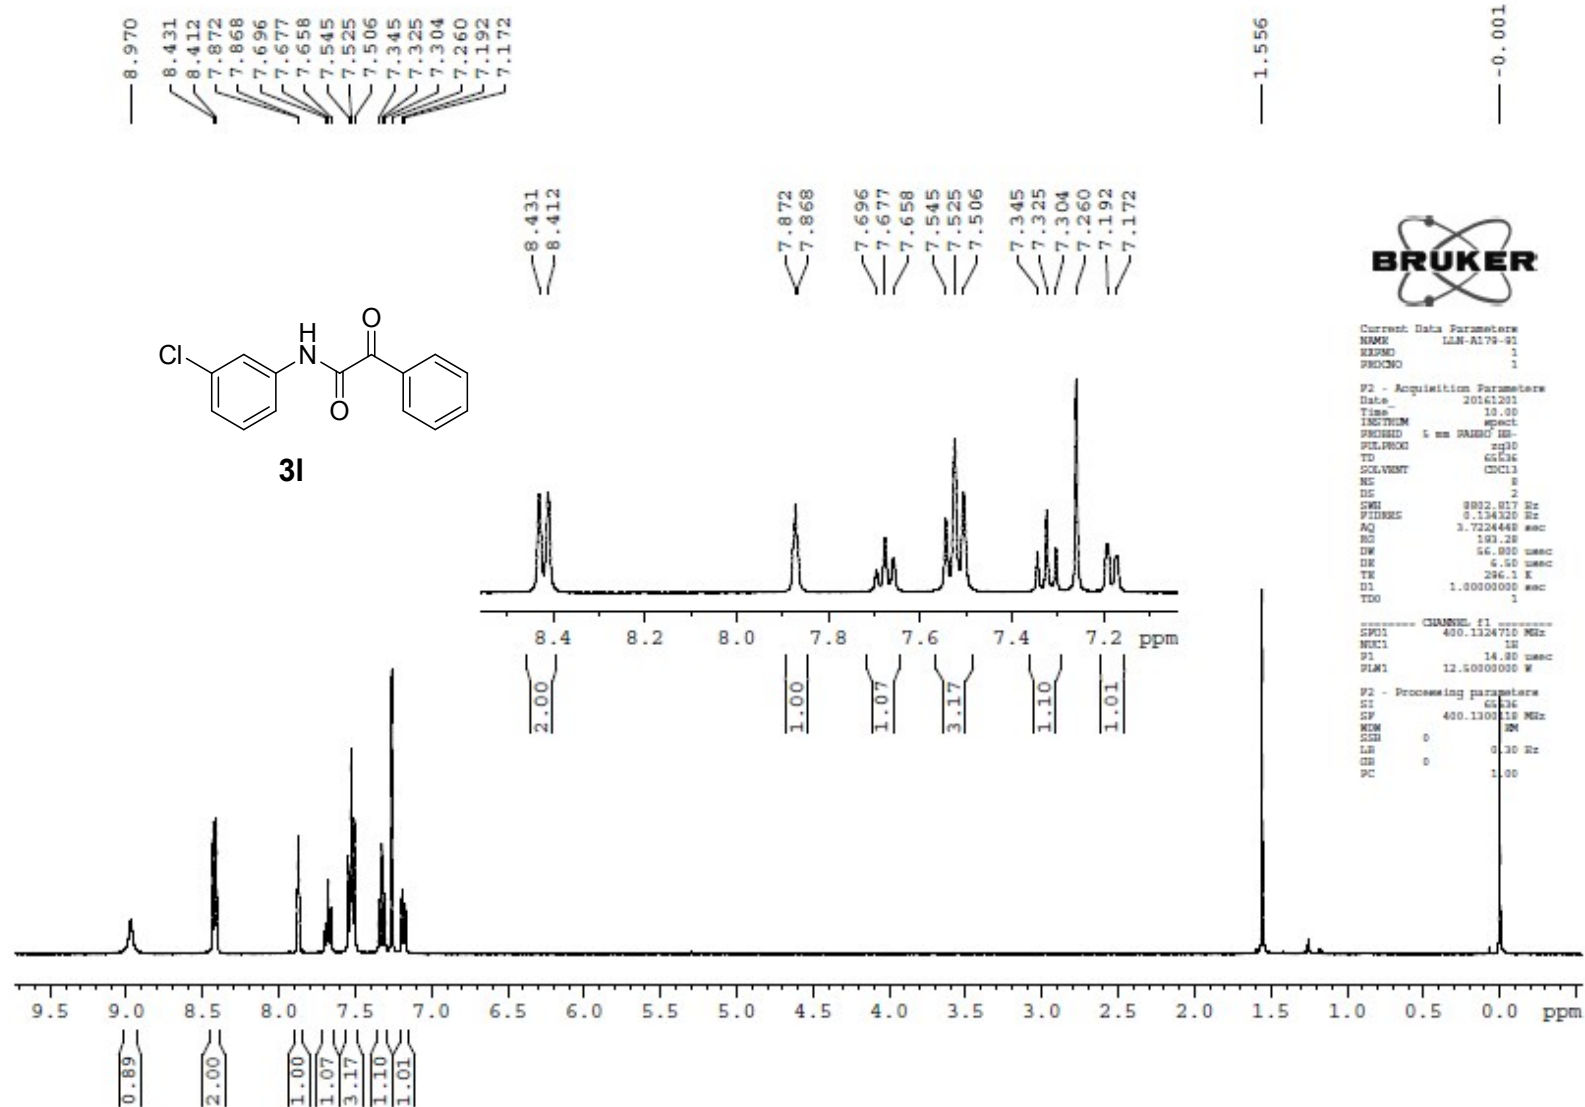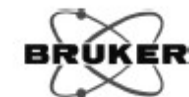

Current Data Parameters  
NAME L2N-A179-01  
EXPNO 1  
PROCNO 1

F2 - Acquisition Parameters  
Date\_ 20161201  
Time 10.30  
INSTRUM spect  
PROBHD 5 mm QNP1H H  
PULPROG zgpg30  
TD 65536  
SOLVENT CDCl3  
NS 8  
DS 2  
SWH 8802.817 Hz  
FIDRES 0.134320 Hz  
AQ 1.7224448 sec  
RG 191.28  
DW 56.800 usec  
DE 6.50 usec  
TE 296.1 K  
D1 1.0000000 sec  
TD0 1

===== CHANNEL f1 =====  
NUC1 400.1324710 MHz  
P1 18  
PL1 12.50000000 W

F2 - Processing parameters  
SI 65536  
SF 400.130918 MHz  
WDW 0  
SSB 0  
LB 0.30 Hz  
GB 0  
PC 1.00

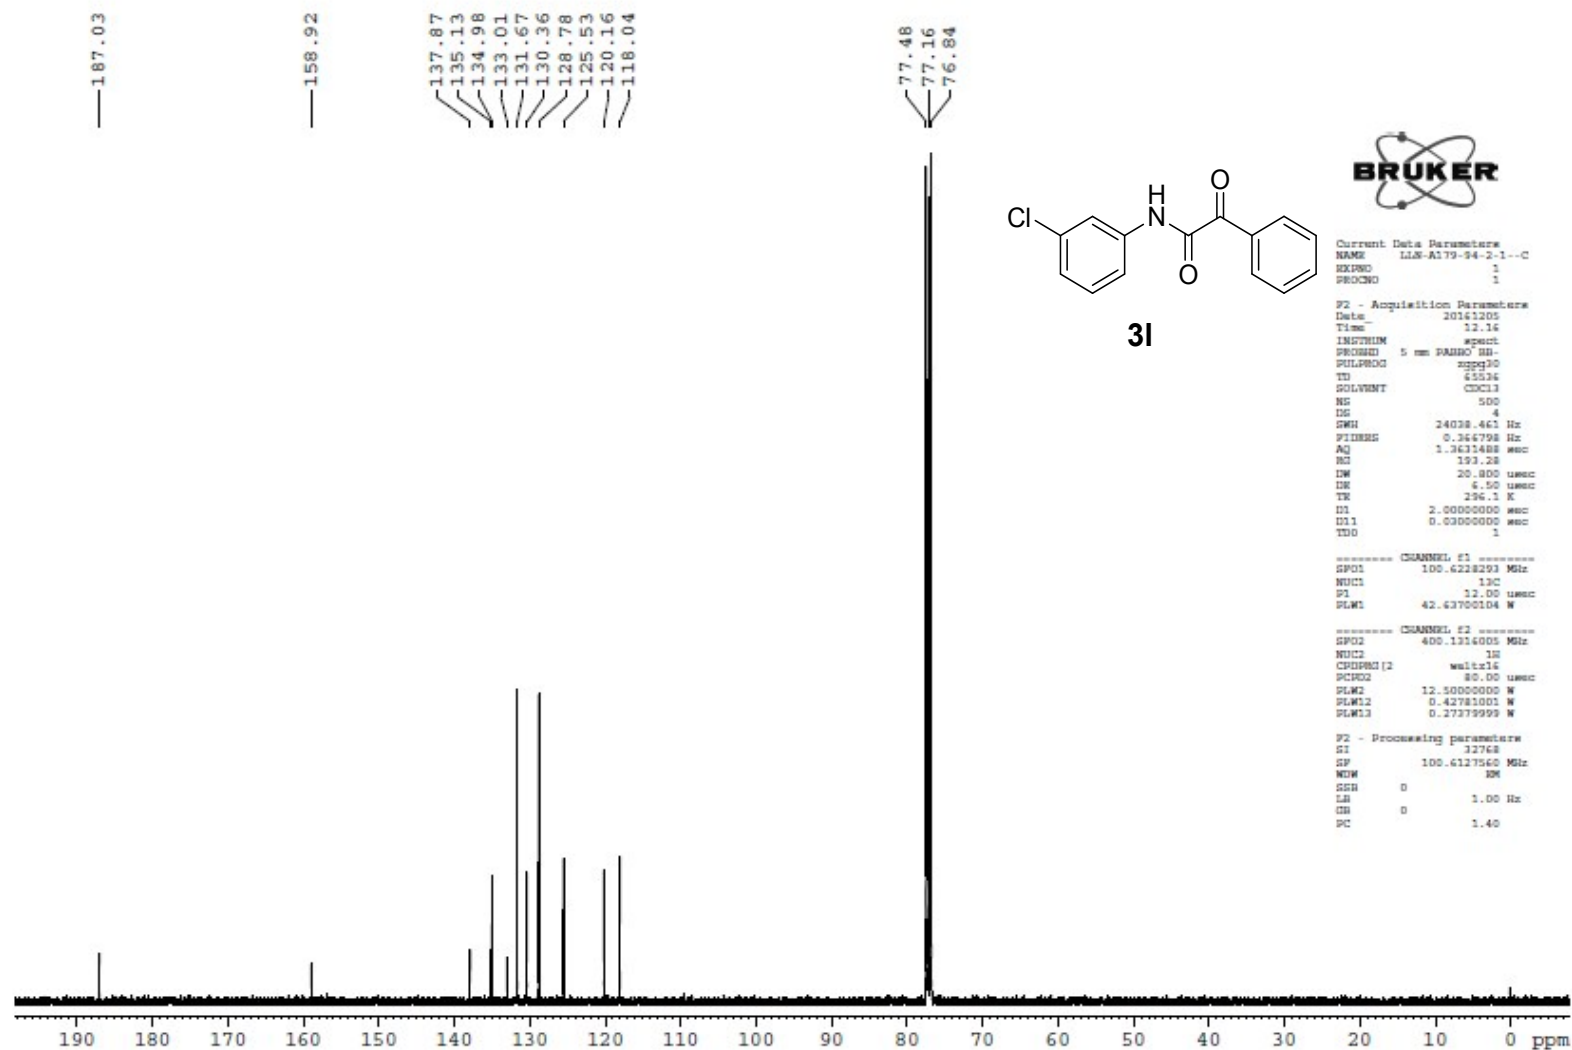

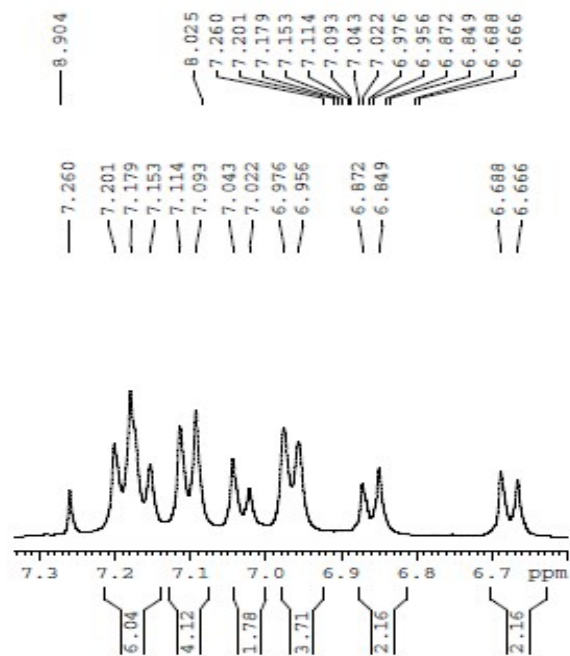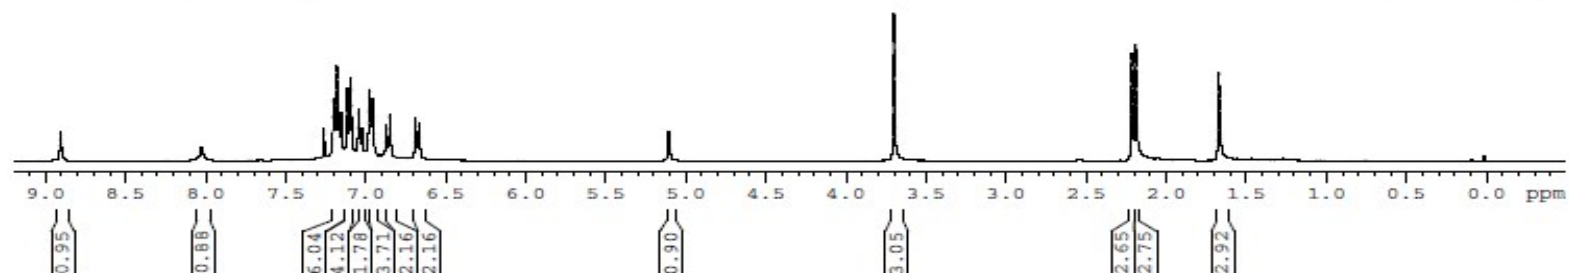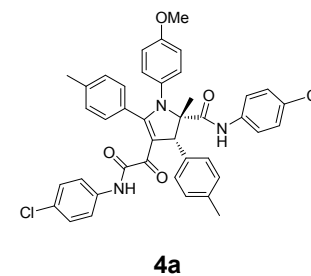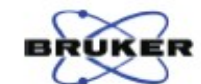

Current Data Parameters  
NAME 12A-A379-156  
EXPNO 1  
PROCNO 1

F2 - Acquisition Parameters  
Date\_ 20170217  
Time 15.31  
INSTRUM spect  
PROBHD 5 mm PASSED 2B-  
PULPROG zgpg30  
TD 65536  
SOLVENT CHCl3  
NS 8  
DS 2  
SWH 8802.817 Hz  
FIDRES 0.134320 Hz  
AQ 3.7224448 sec  
RG 37.47  
SW 66.850 csec  
SB 6.50 csec  
TB 291.1 K  
D1 1.00000000 sec  
TD0 1

===== CHANNEL f1 =====  
NUC1 400.1324710 MHz  
P1 14.80 csec  
PL1 12.50000000 W  
F2 - Processing parameters  
SI 65536  
SF 400.1300142 MHz  
WDW EM  
SSB 0  
GB 0 0.30 Hz  
PC 1.00

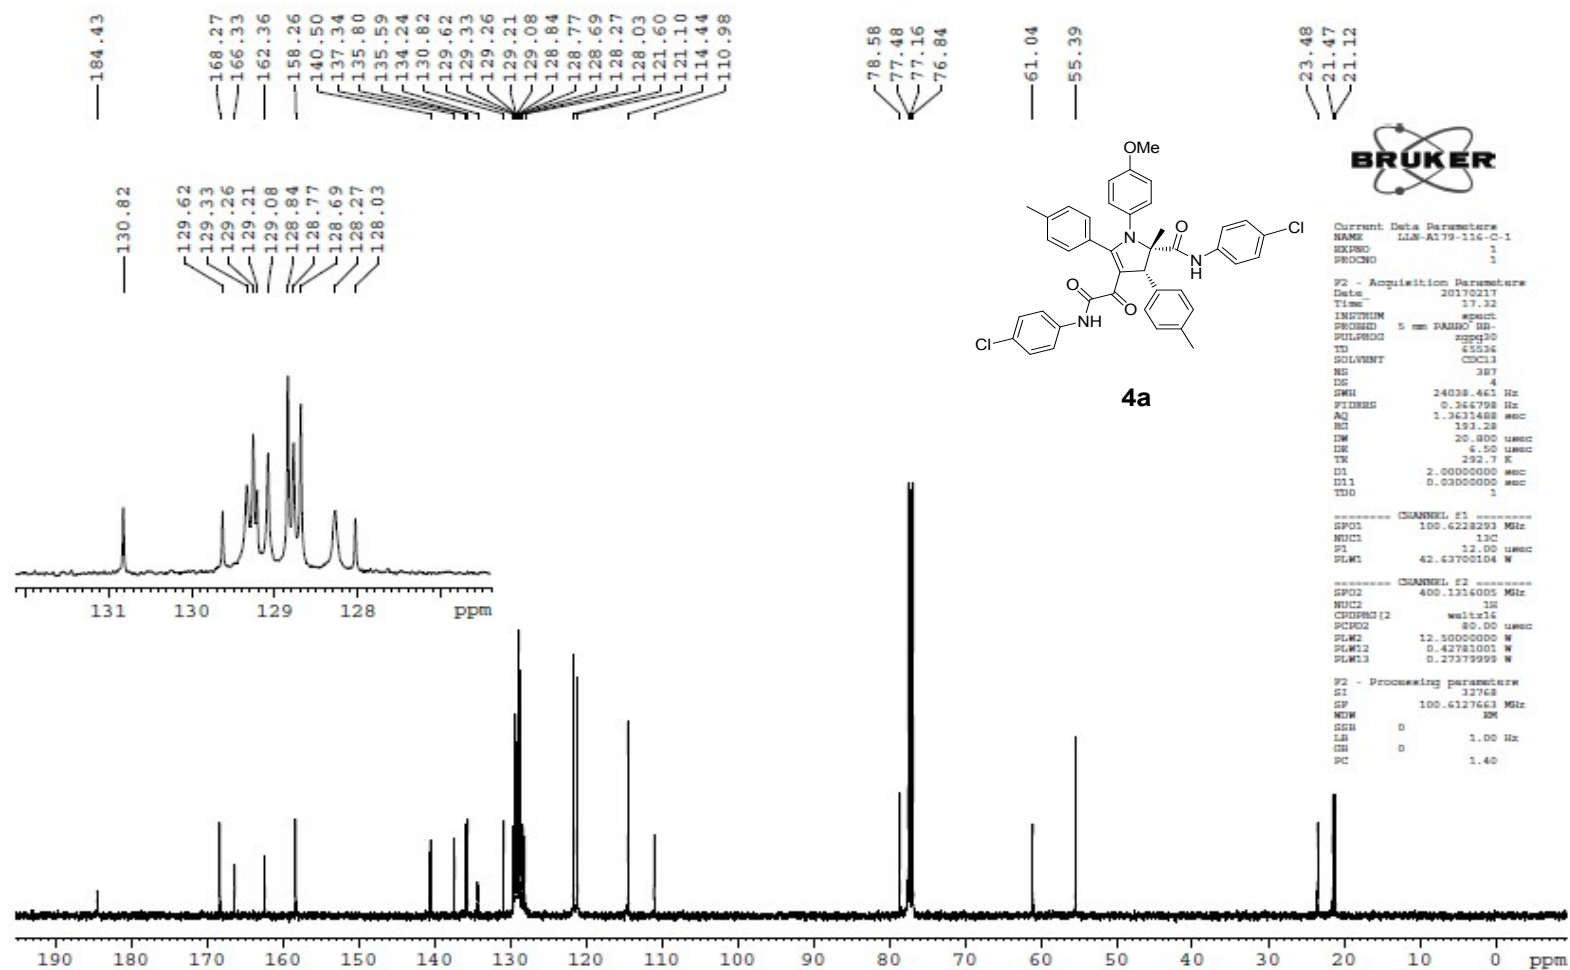

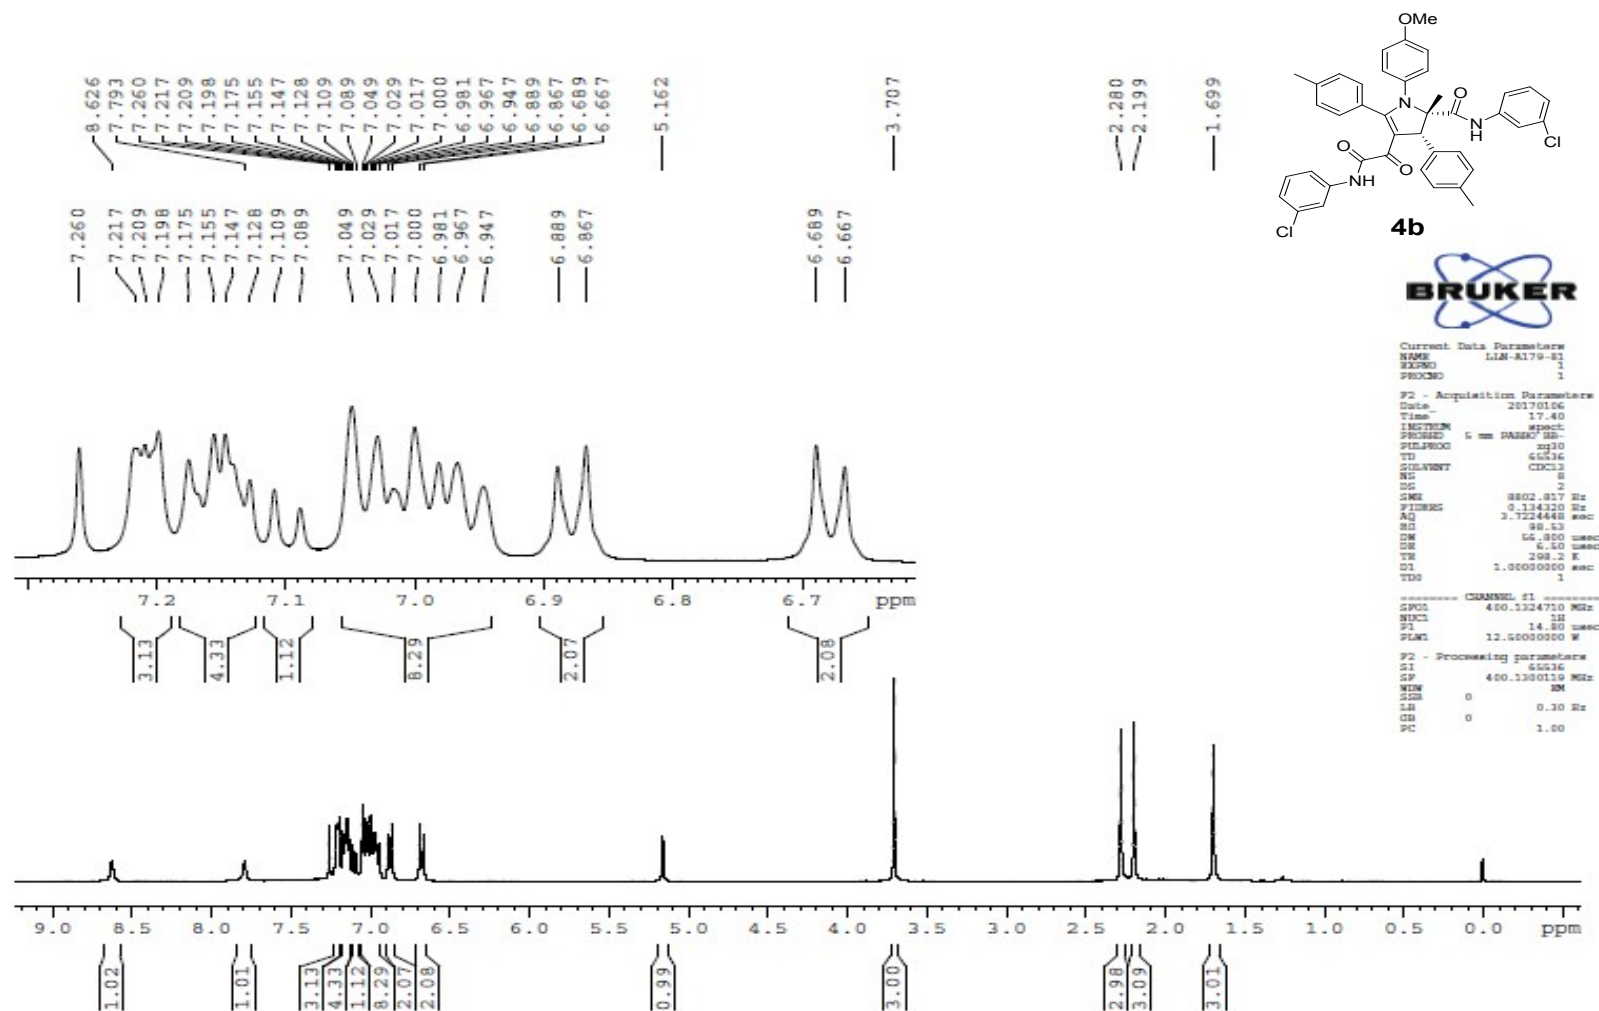



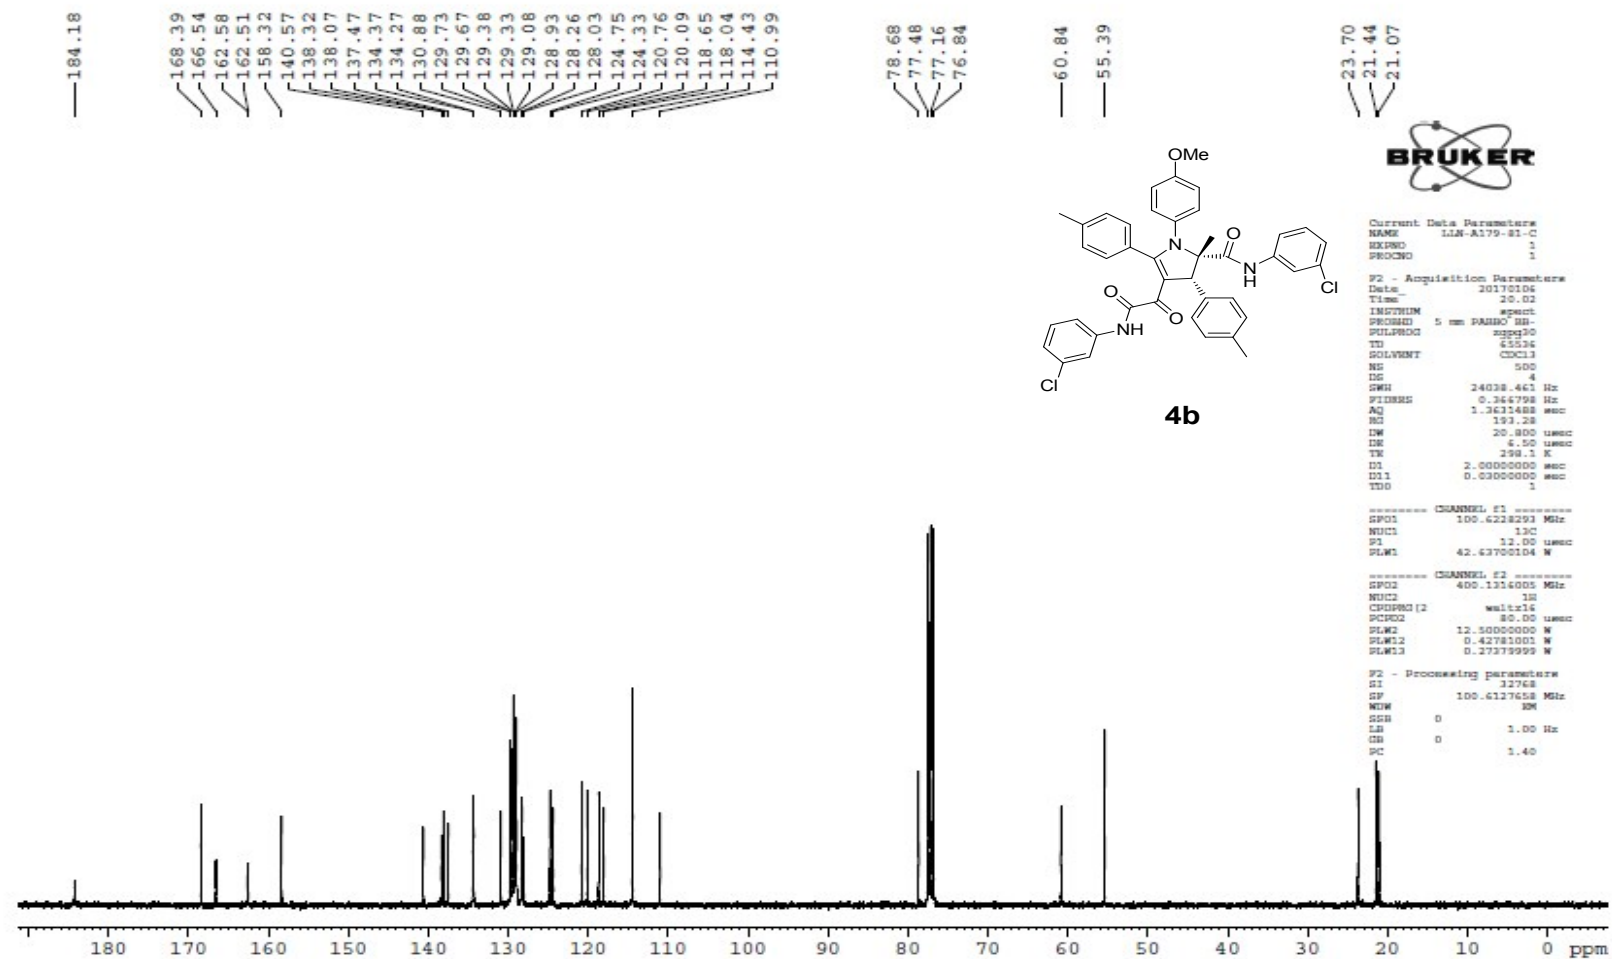

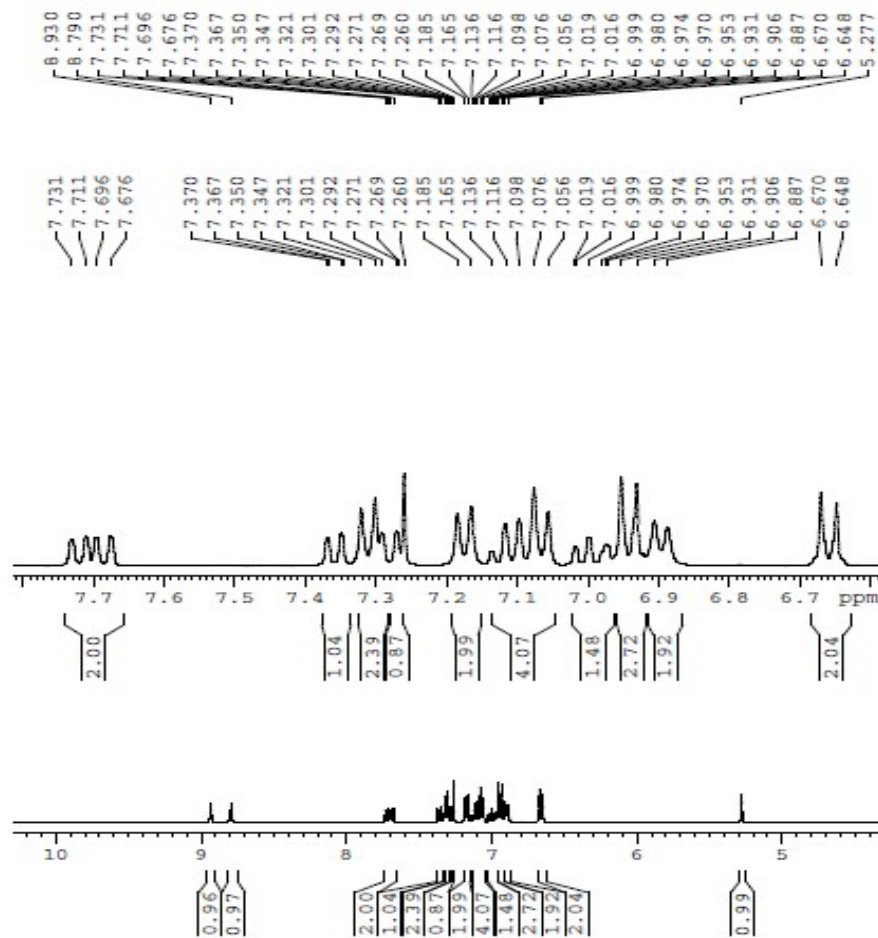

3.697

2.275

2.096

1.652

0.004

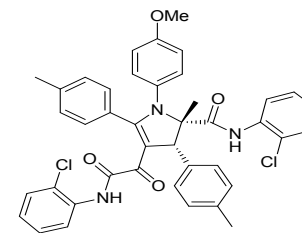

**4c**

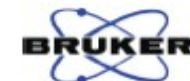

Current Data Parameters  
 NAME 128-P-8  
 EXPNO 1  
 PROCNO 1

F2 - Acquisition Parameters  
 Date\_ 20141120  
 Time\_ 19.11  
 INSTRUM spect  
 PROBRD 5 mm BBO-2B-  
 PULPROG zg30  
 TD 65536  
 SOLVENT CHCl3  
 NS 8  
 DS 2  
 SWE 8802.817 Hz  
 FIDRES 0.134320 Hz  
 AQ 3.1224448 sec  
 RG 131.57  
 DM 56.820 usec  
 DE 6.10 usec  
 TE 295.0 K  
 D1 1.00000000 sec  
 TDS 1

----- CHANNEL f1 -----  
 SFO1 400.1324710 MHz  
 NUCL1 1H  
 P1 14.80 usec  
 PLW1 12.50000000 W

F2 - Processing parameters  
 S1 65536  
 SF 400.1300113 MHz  
 WDW RM  
 SSB 0  
 LB 0.30 Hz  
 GB 0  
 PC 1.00

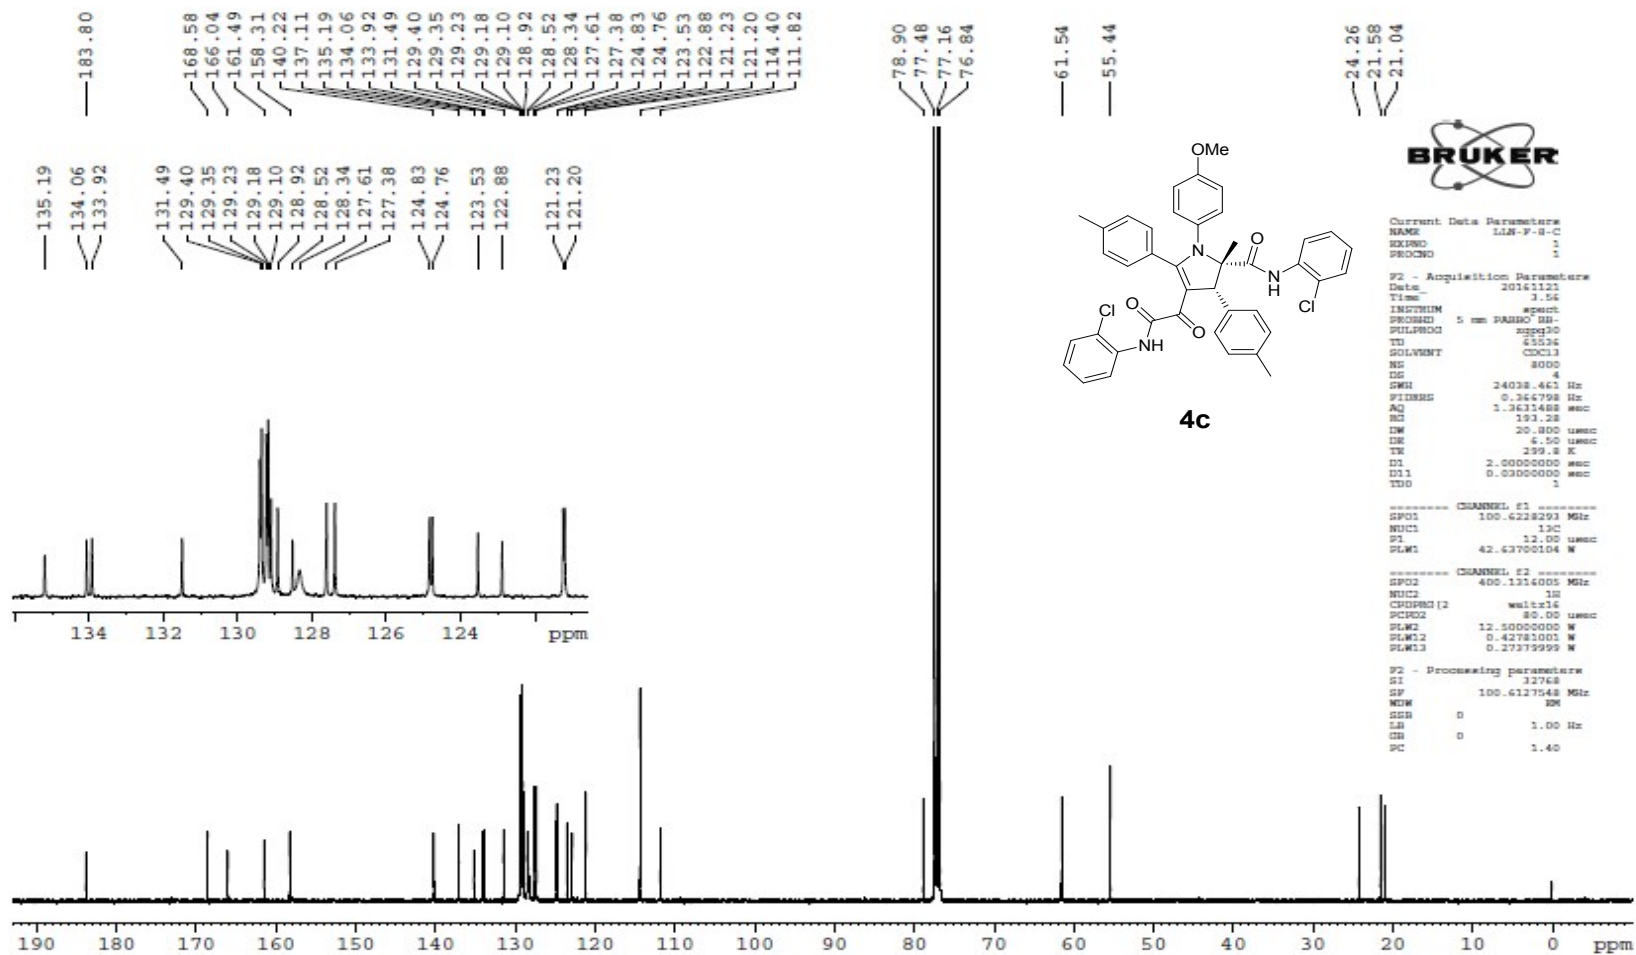

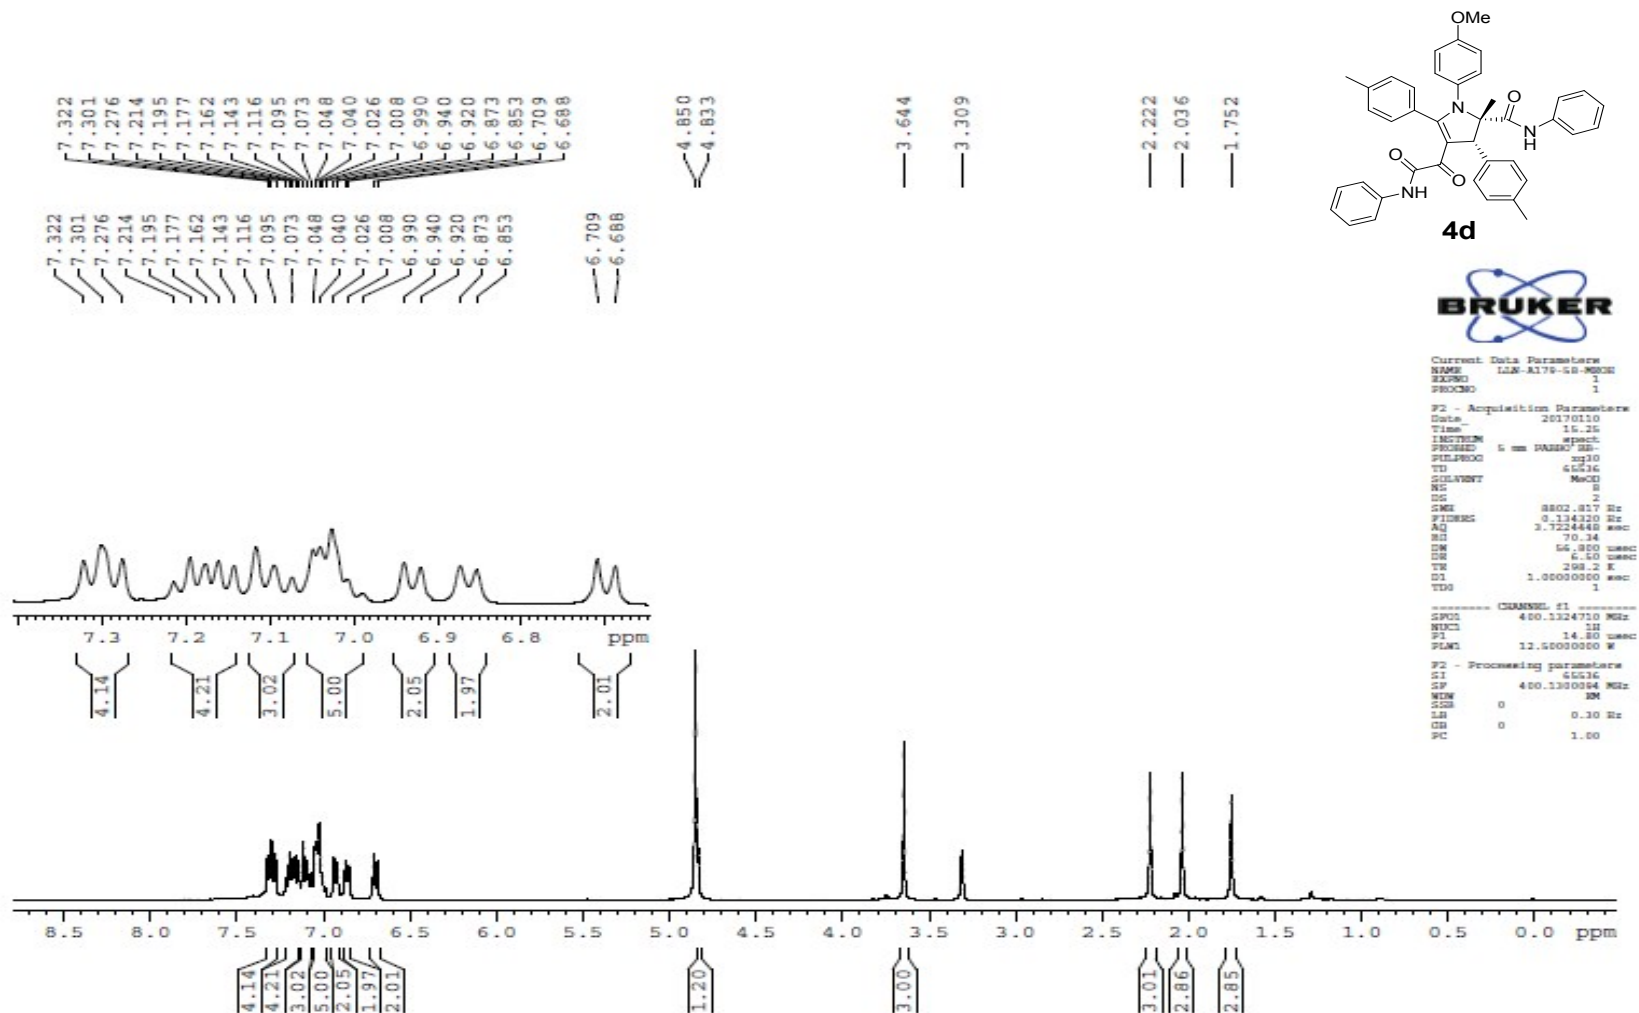

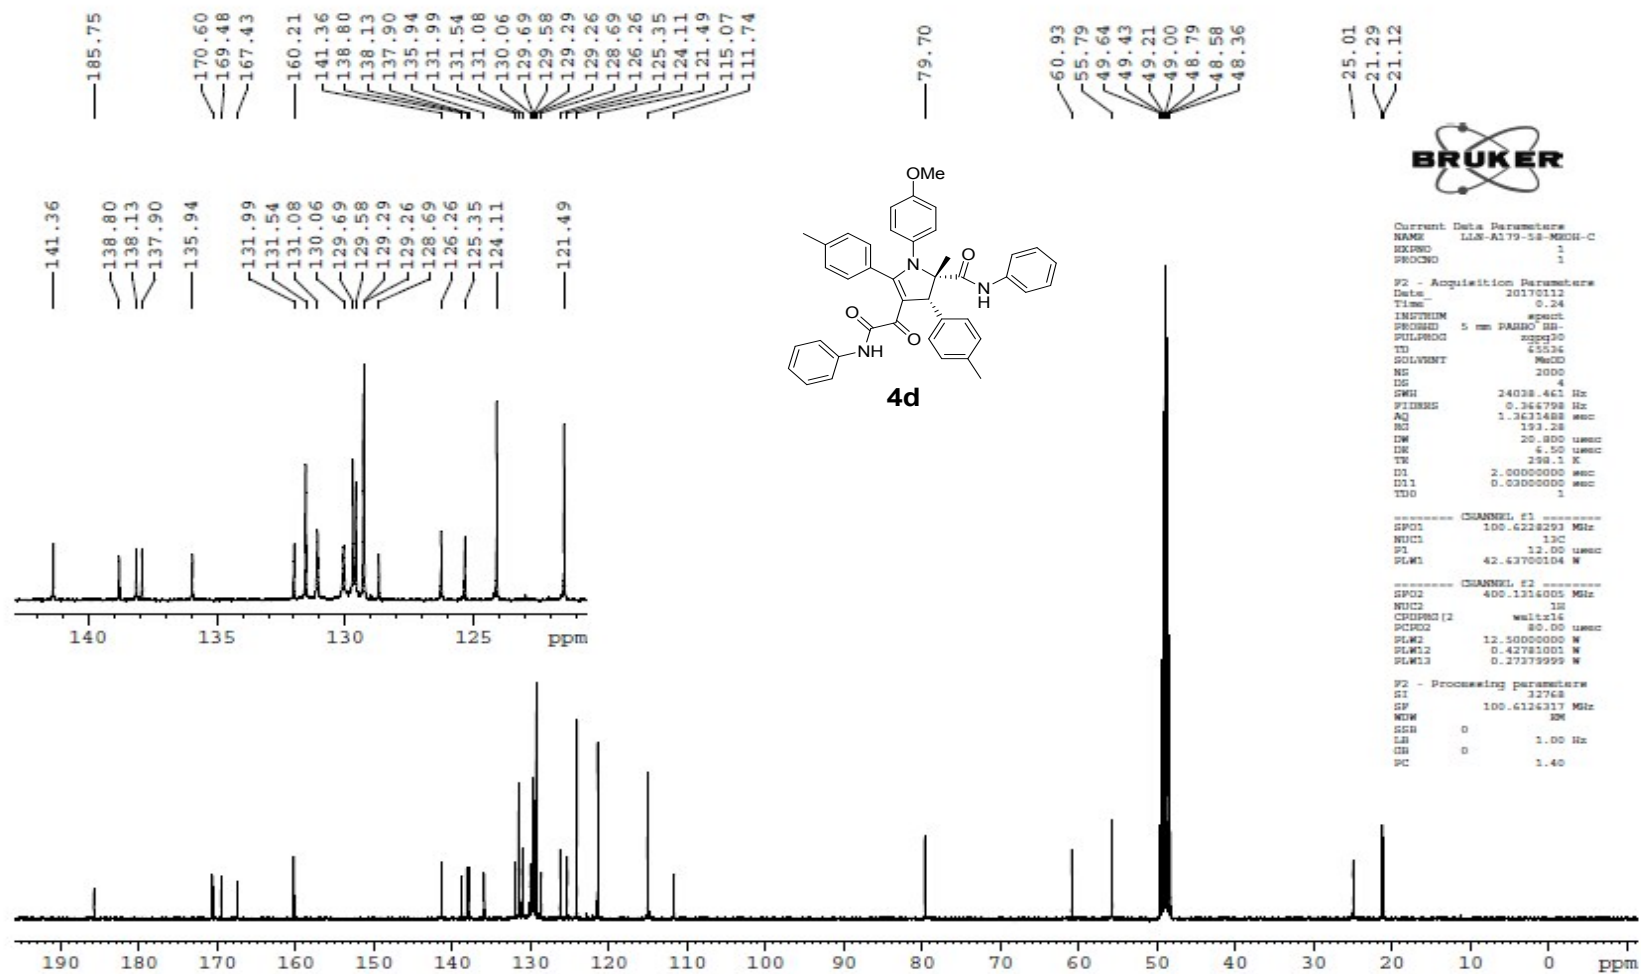

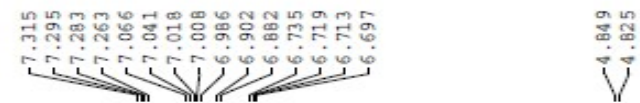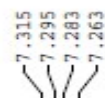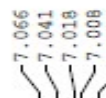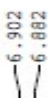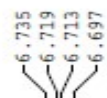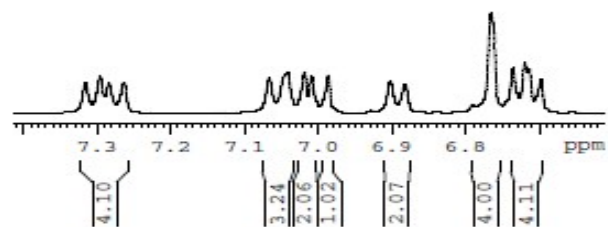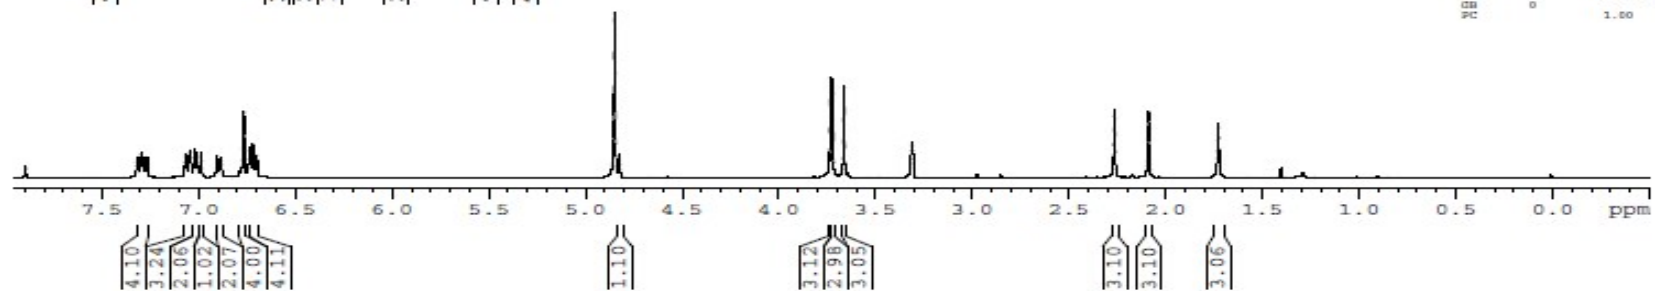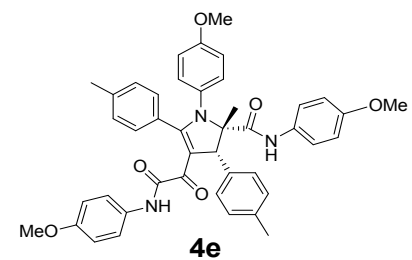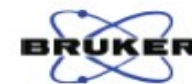

Current Data Parameters  
NAME 12A-P-7-MECH  
EXPNO 1  
PROCNO 1

F2 - Acquisition Parameters  
Date\_ 20170113  
Time 10.53  
INSTRUM spect  
PROBHD 5 mm HARR-5B-  
PULPROG zgpg30  
TD 65536  
SOLVENT MeOH  
NS 8  
DS 2  
SWH 8802.857 Hz  
FIDRES 0.134320 Hz  
AQ 3.7224448 sec  
RG 77.88  
DM 64.800 cmec  
DE 6.50 cmec  
TE 298.1 K  
D1 1.00000000 sec  
TD0 1

----- CHANNEL f1 -----  
SFO2 400.1324710 MHz  
NUC1 1H  
P1 14.80 cmec  
PLA1 12.50000000 W

F2 - Processing parameters  
SI 65536  
SF 400.1300087 MHz  
WDW EM  
SSB 0  
LB 0.30 Hz  
GB 0  
PC 1.00



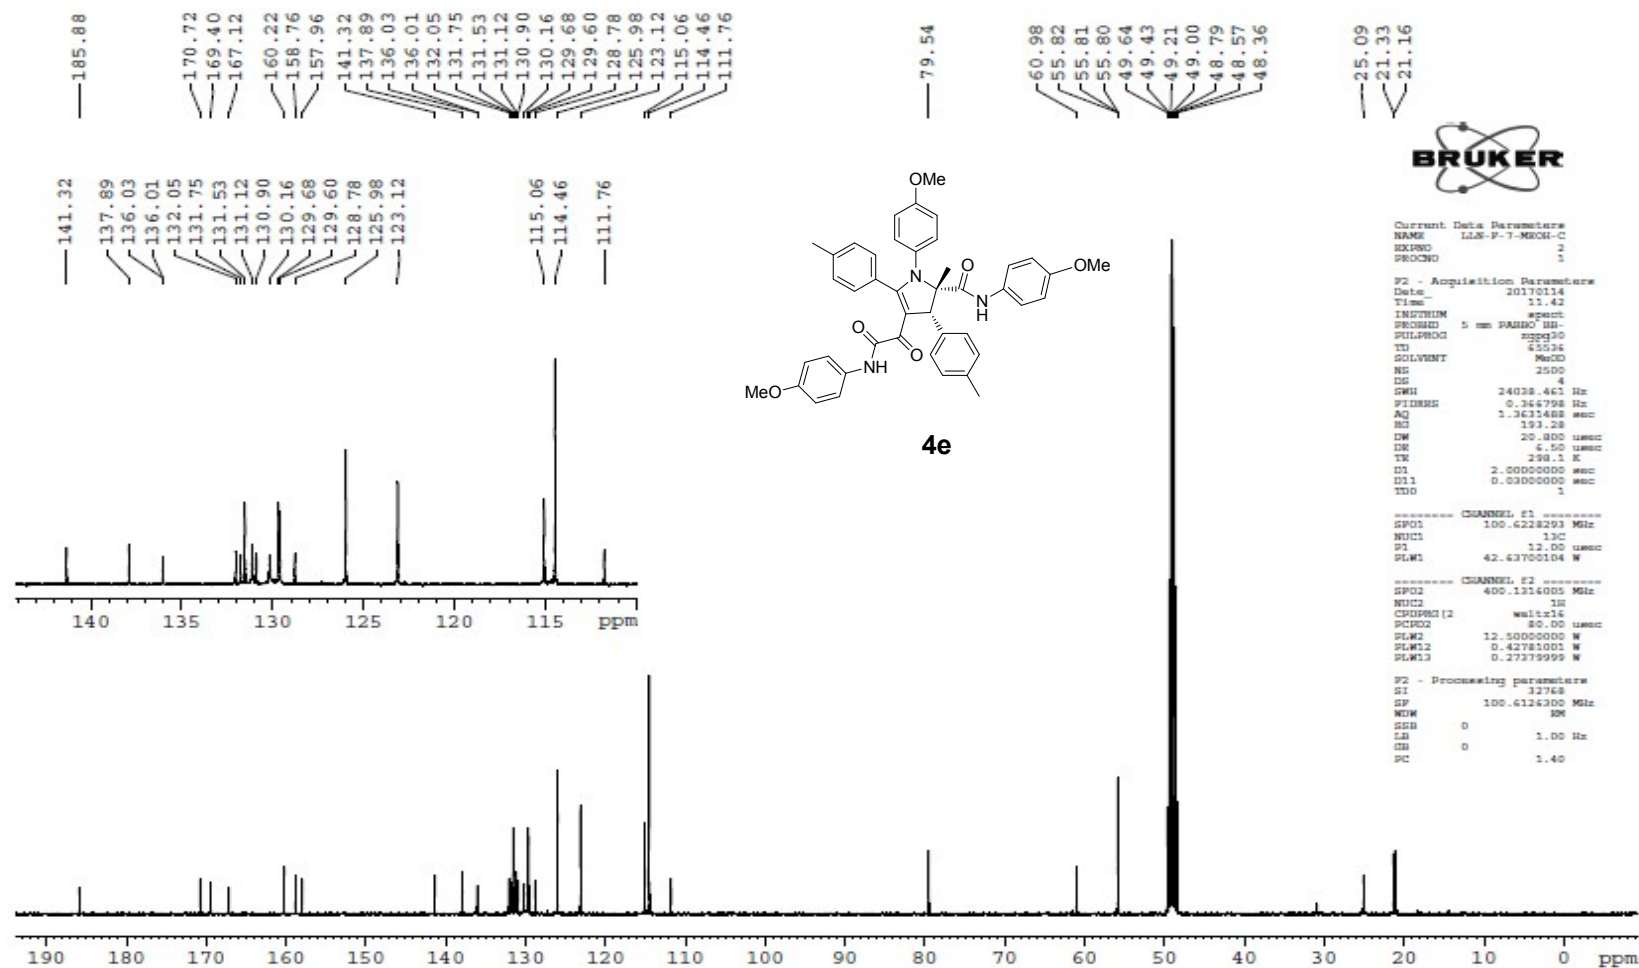

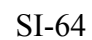



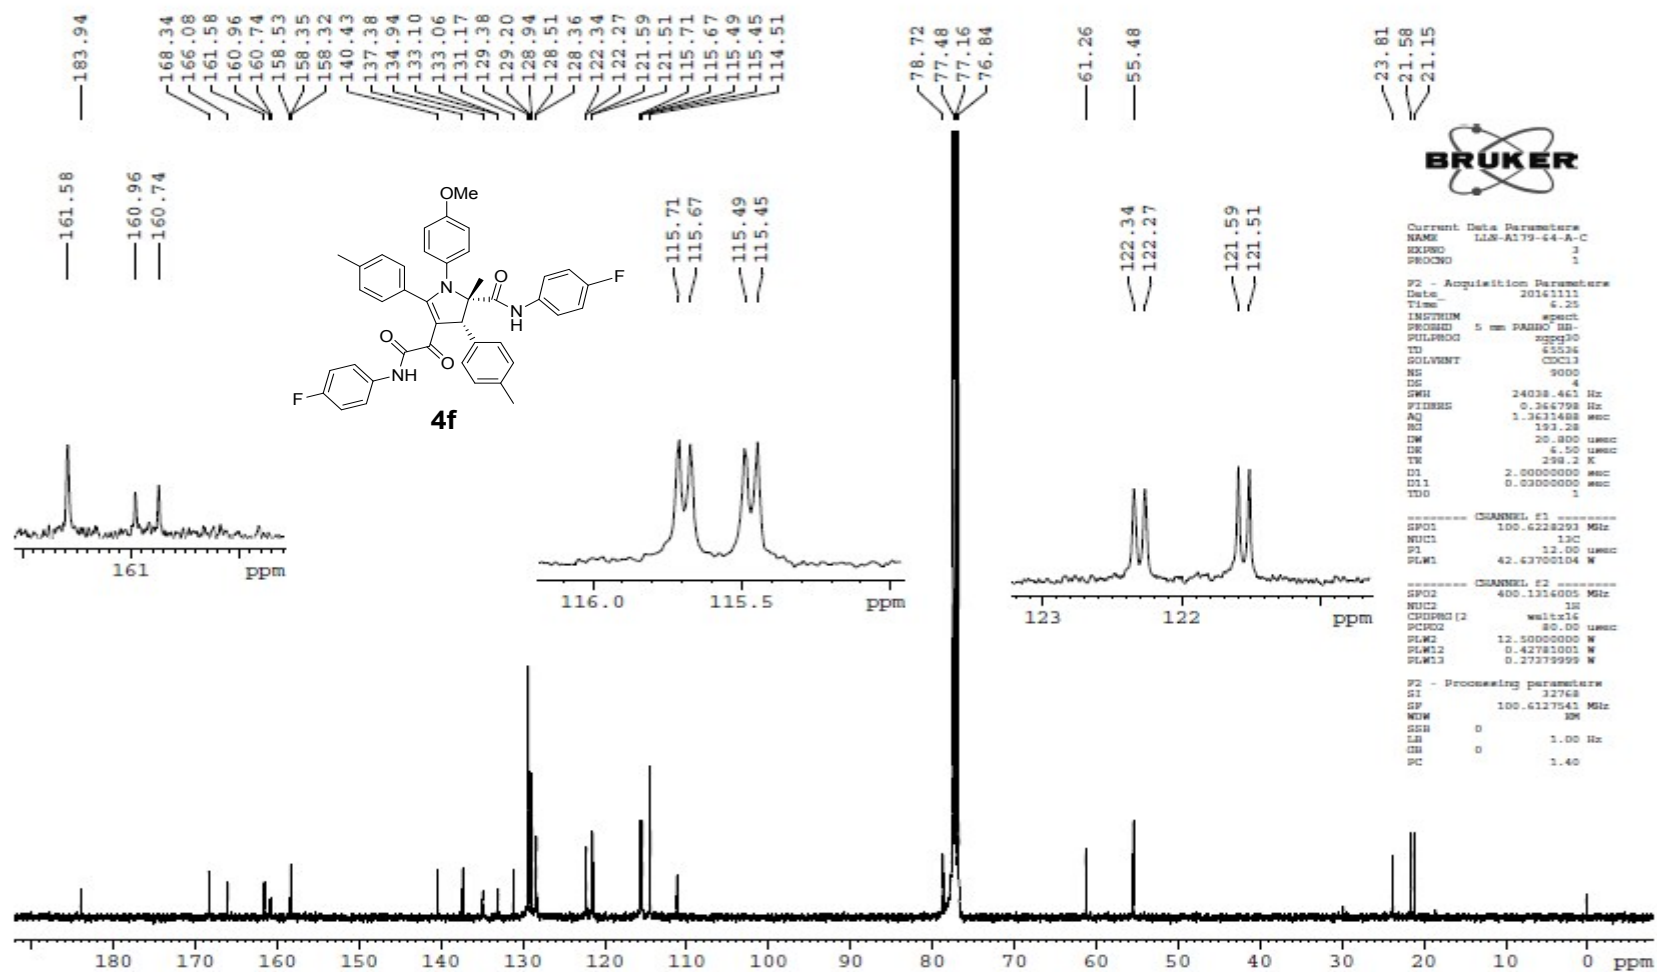

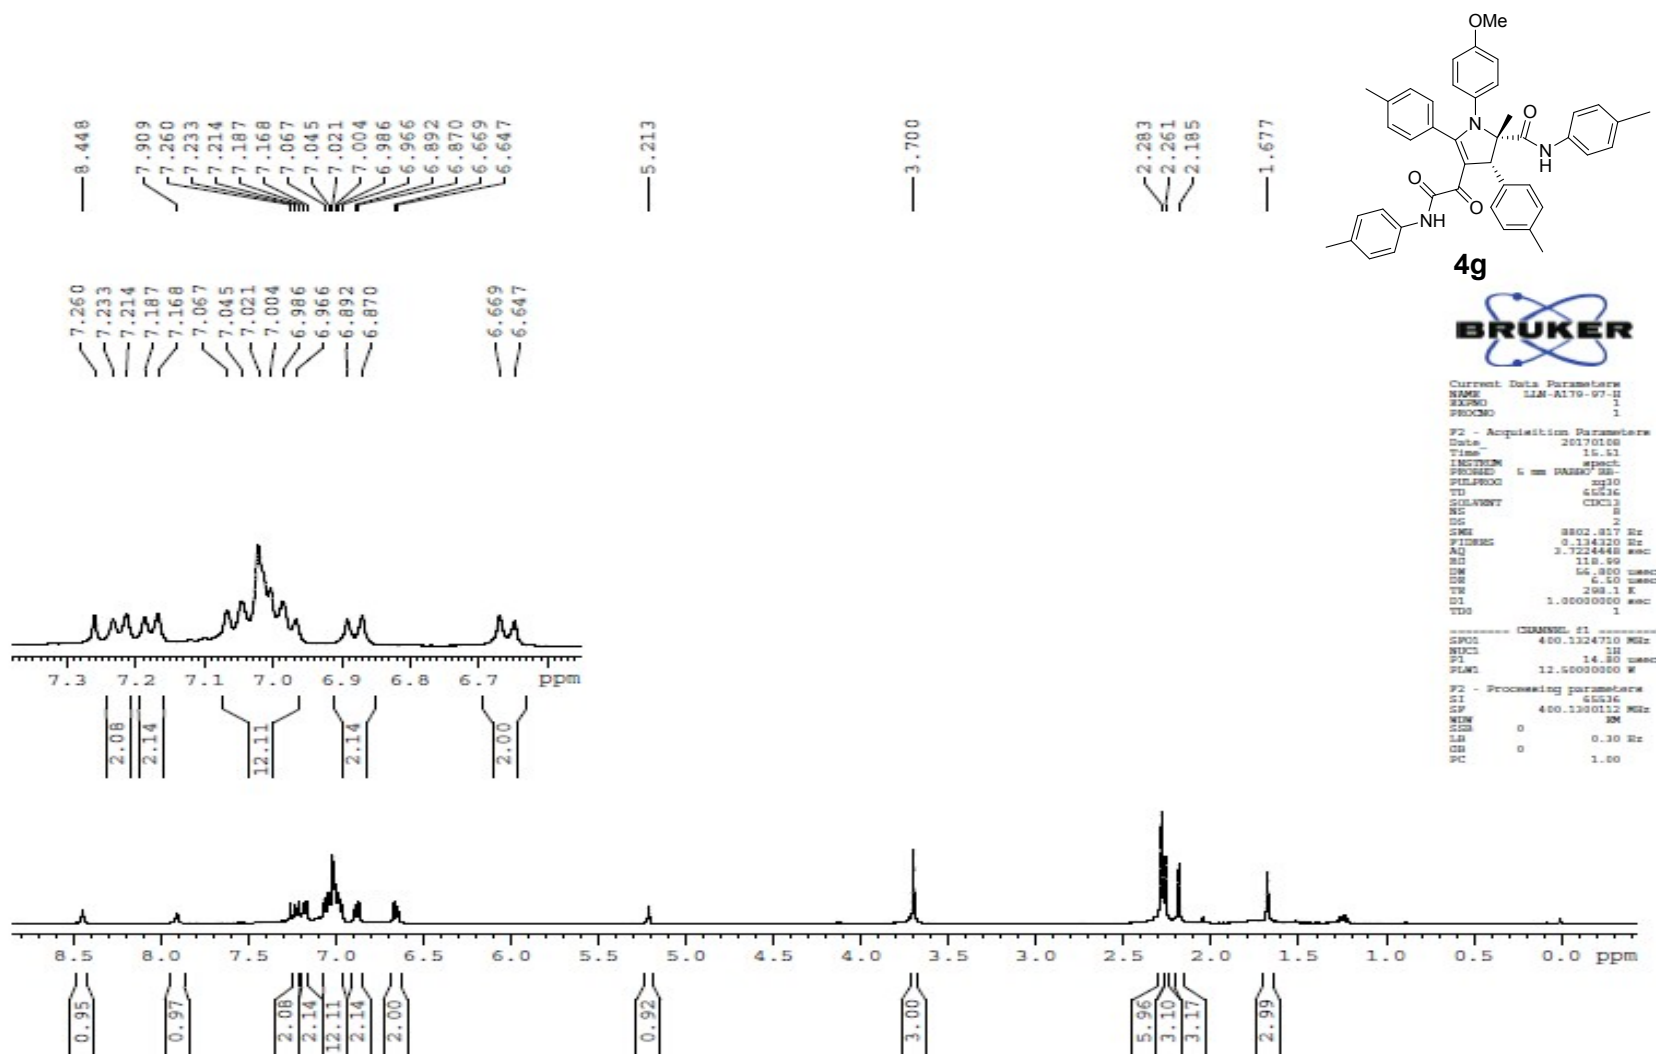

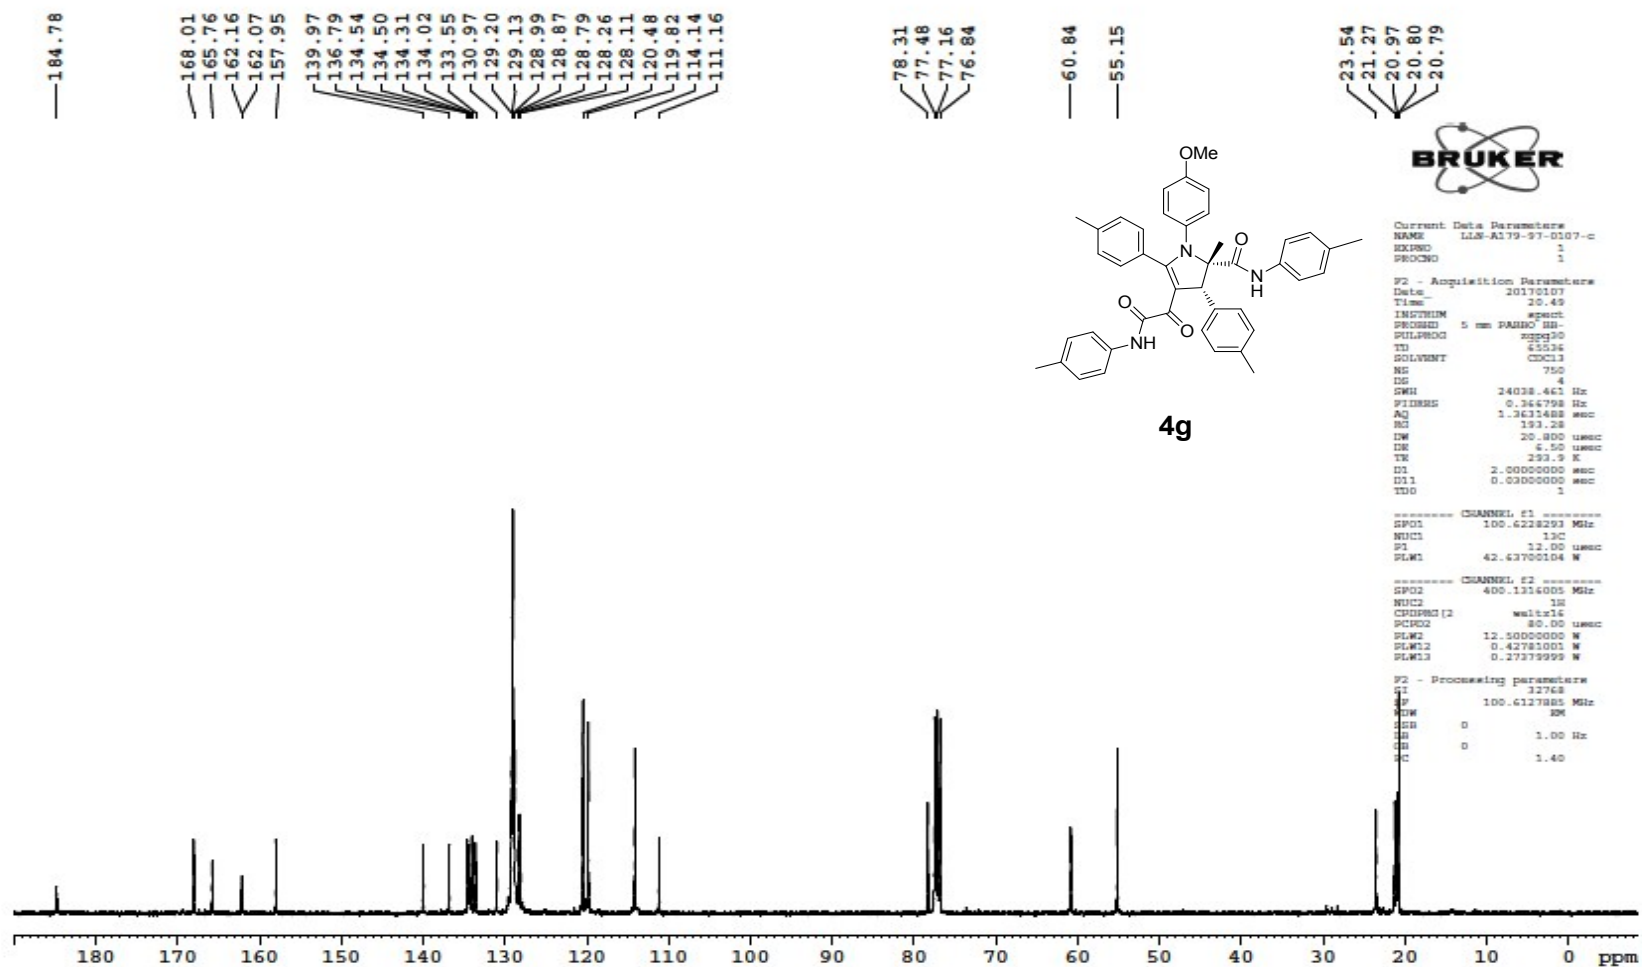

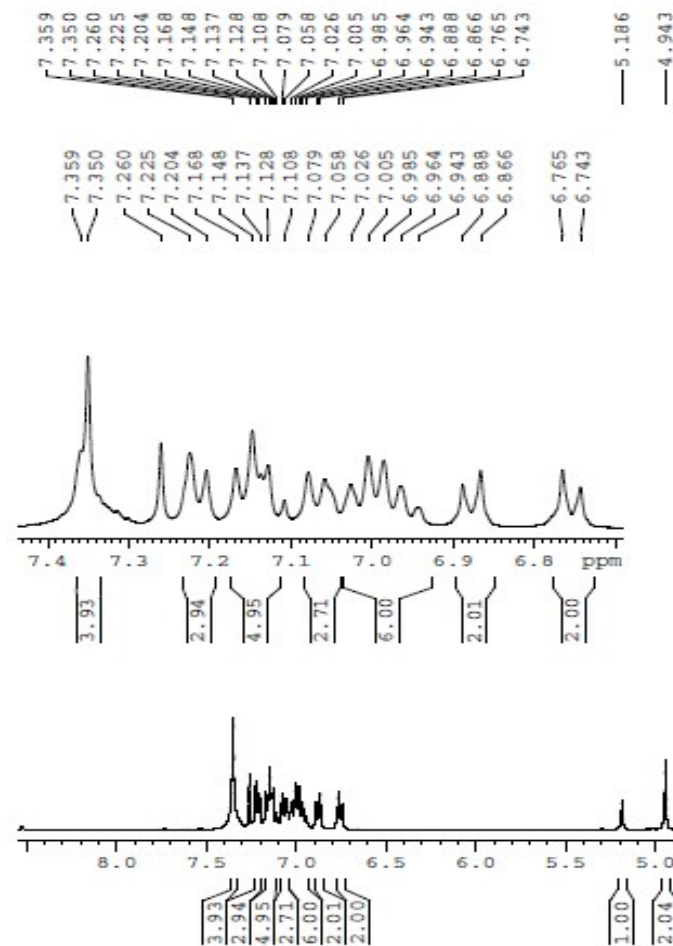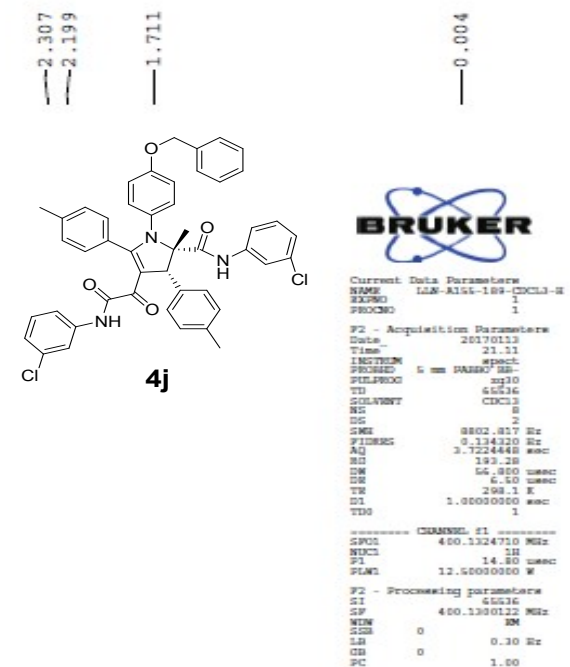

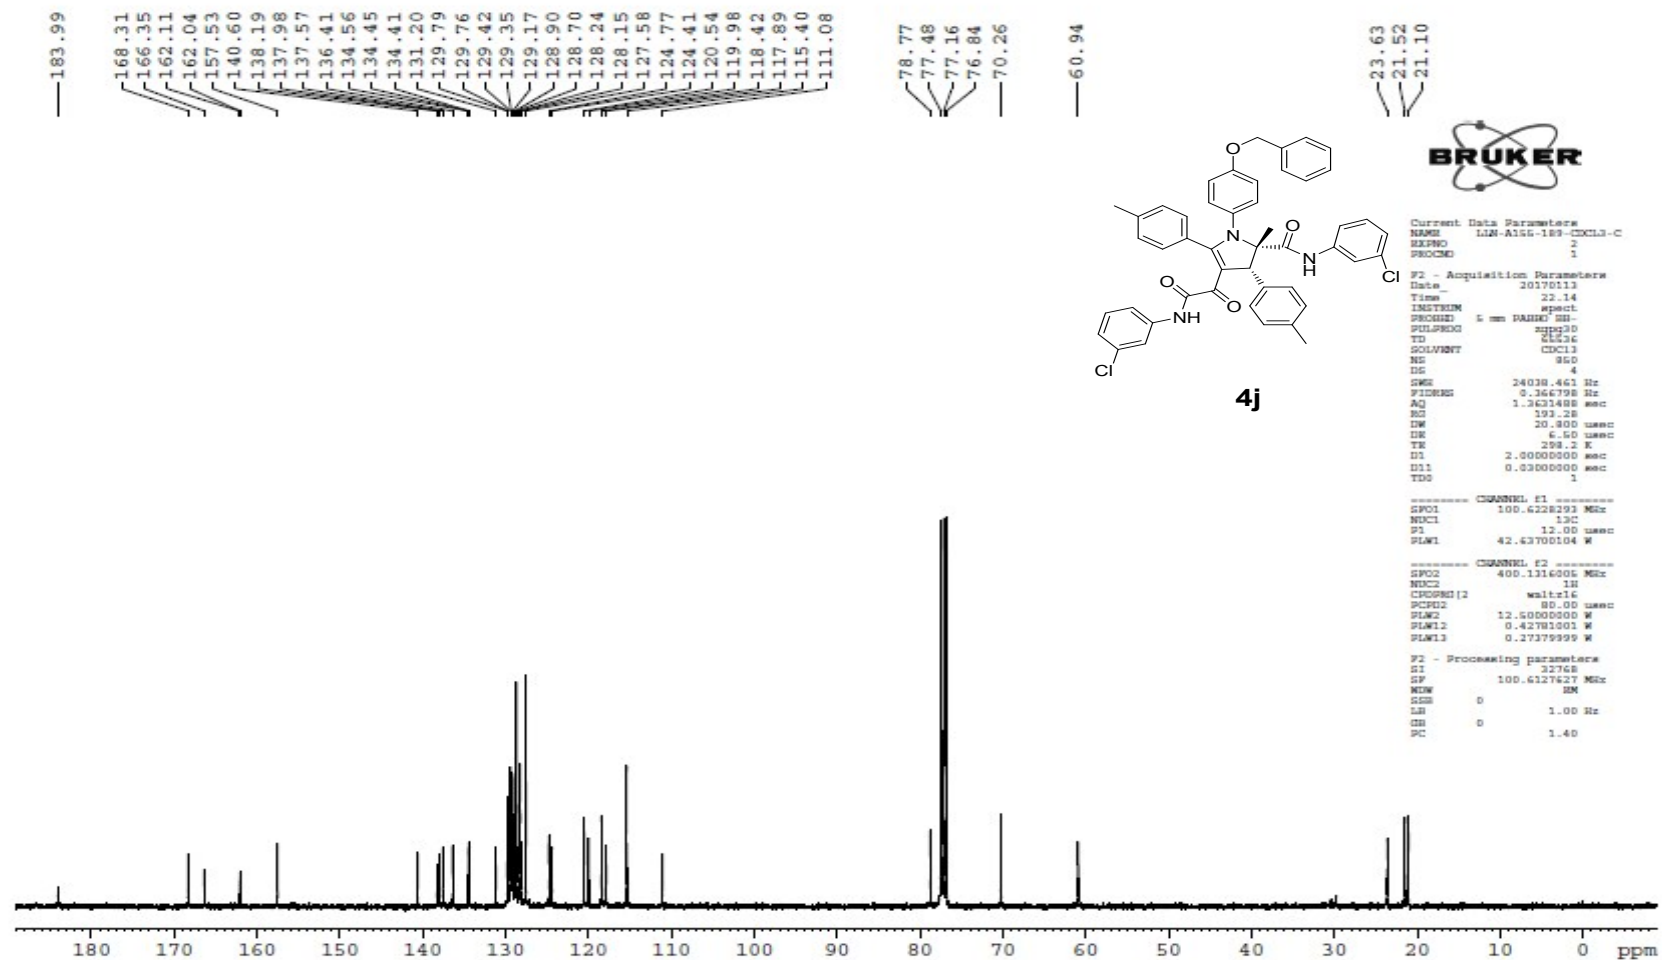

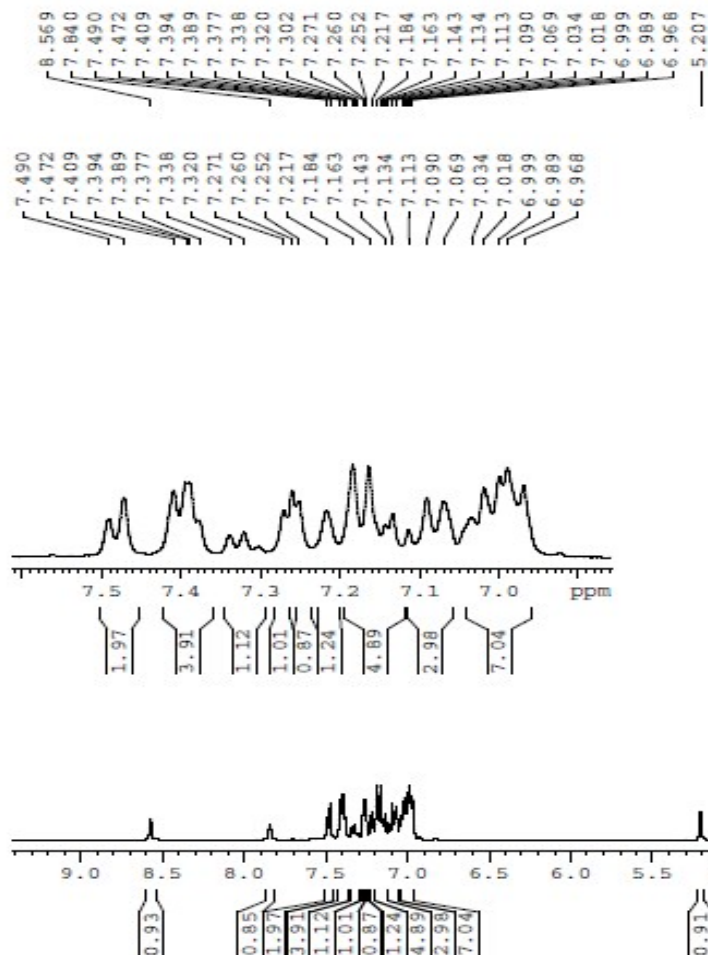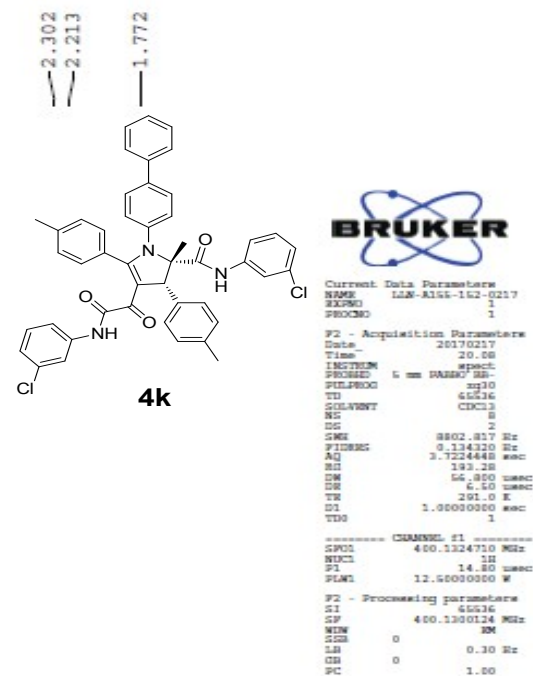



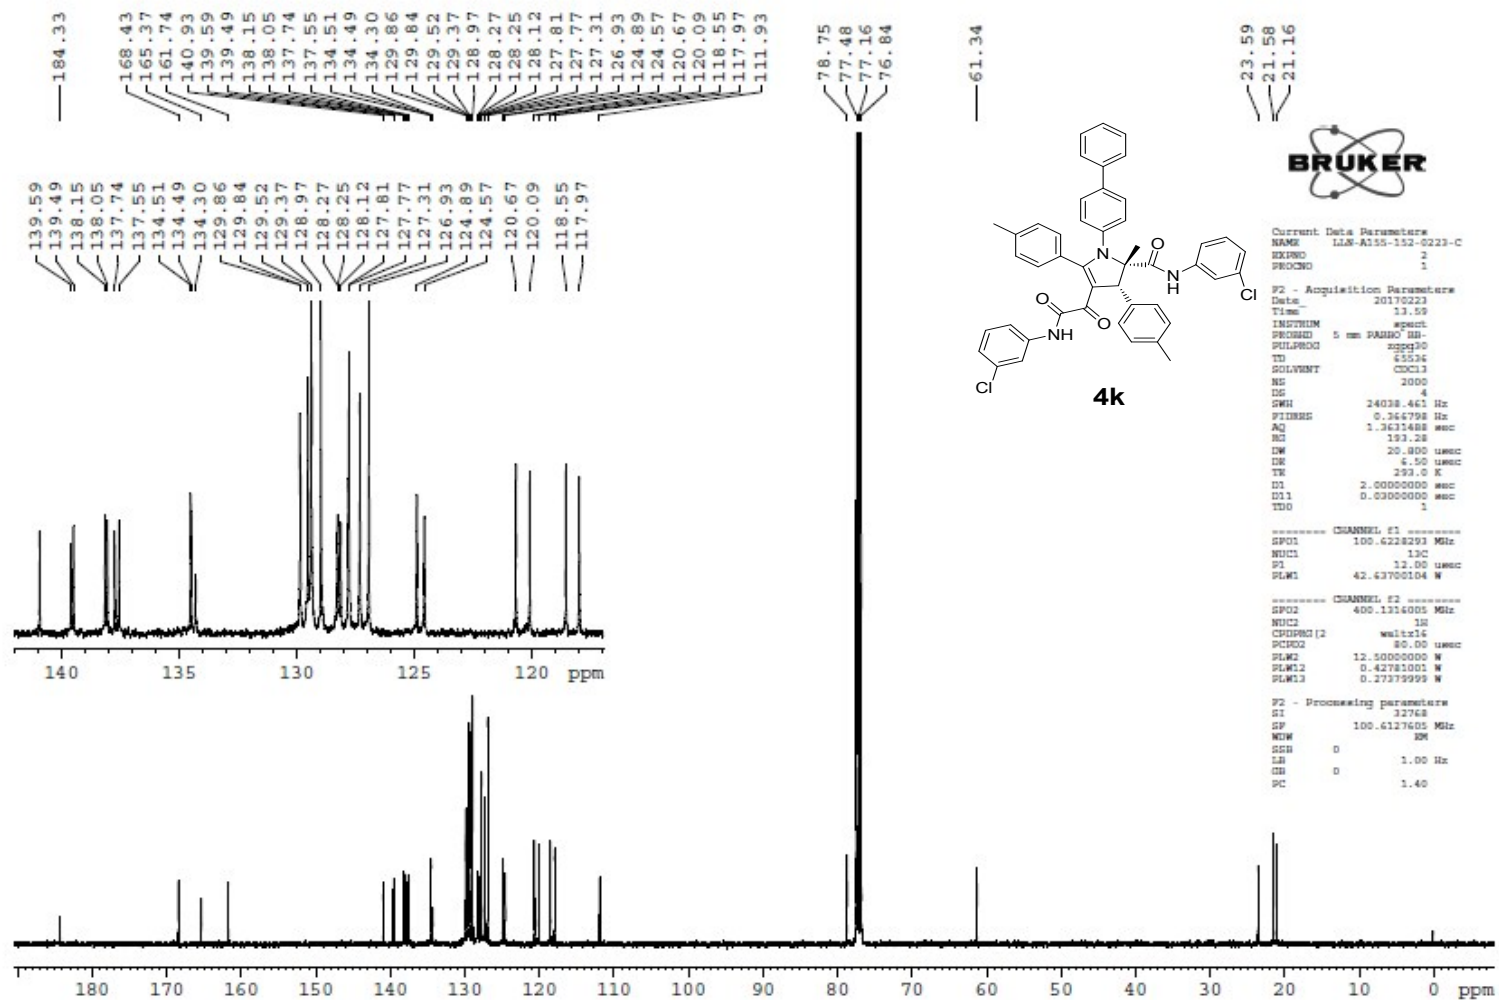

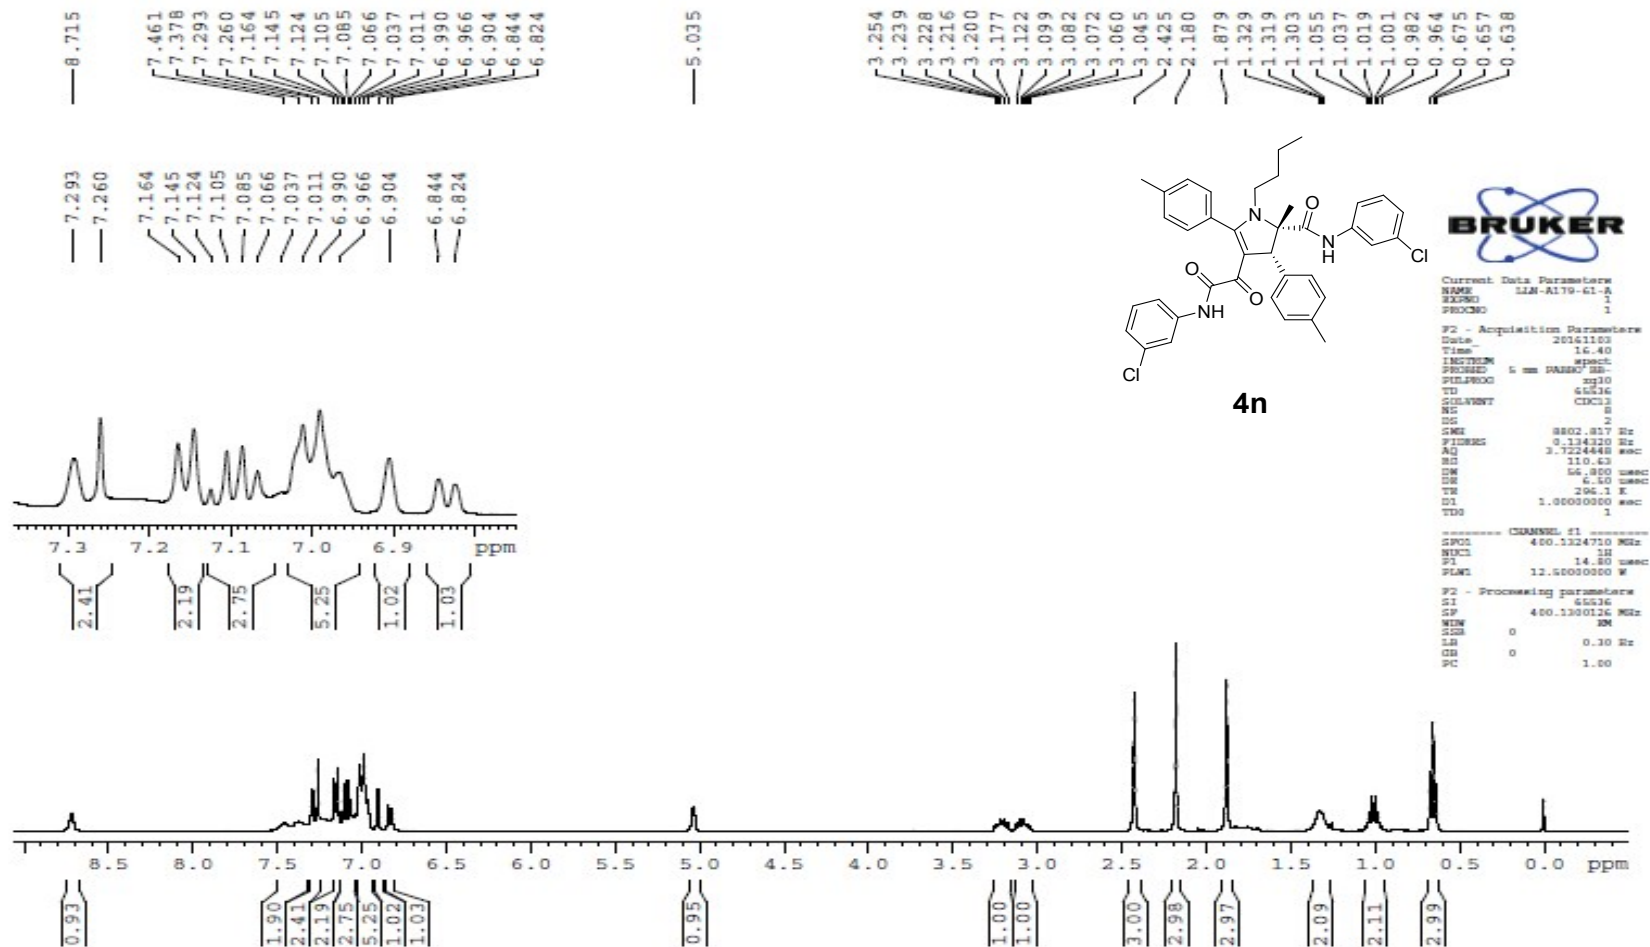



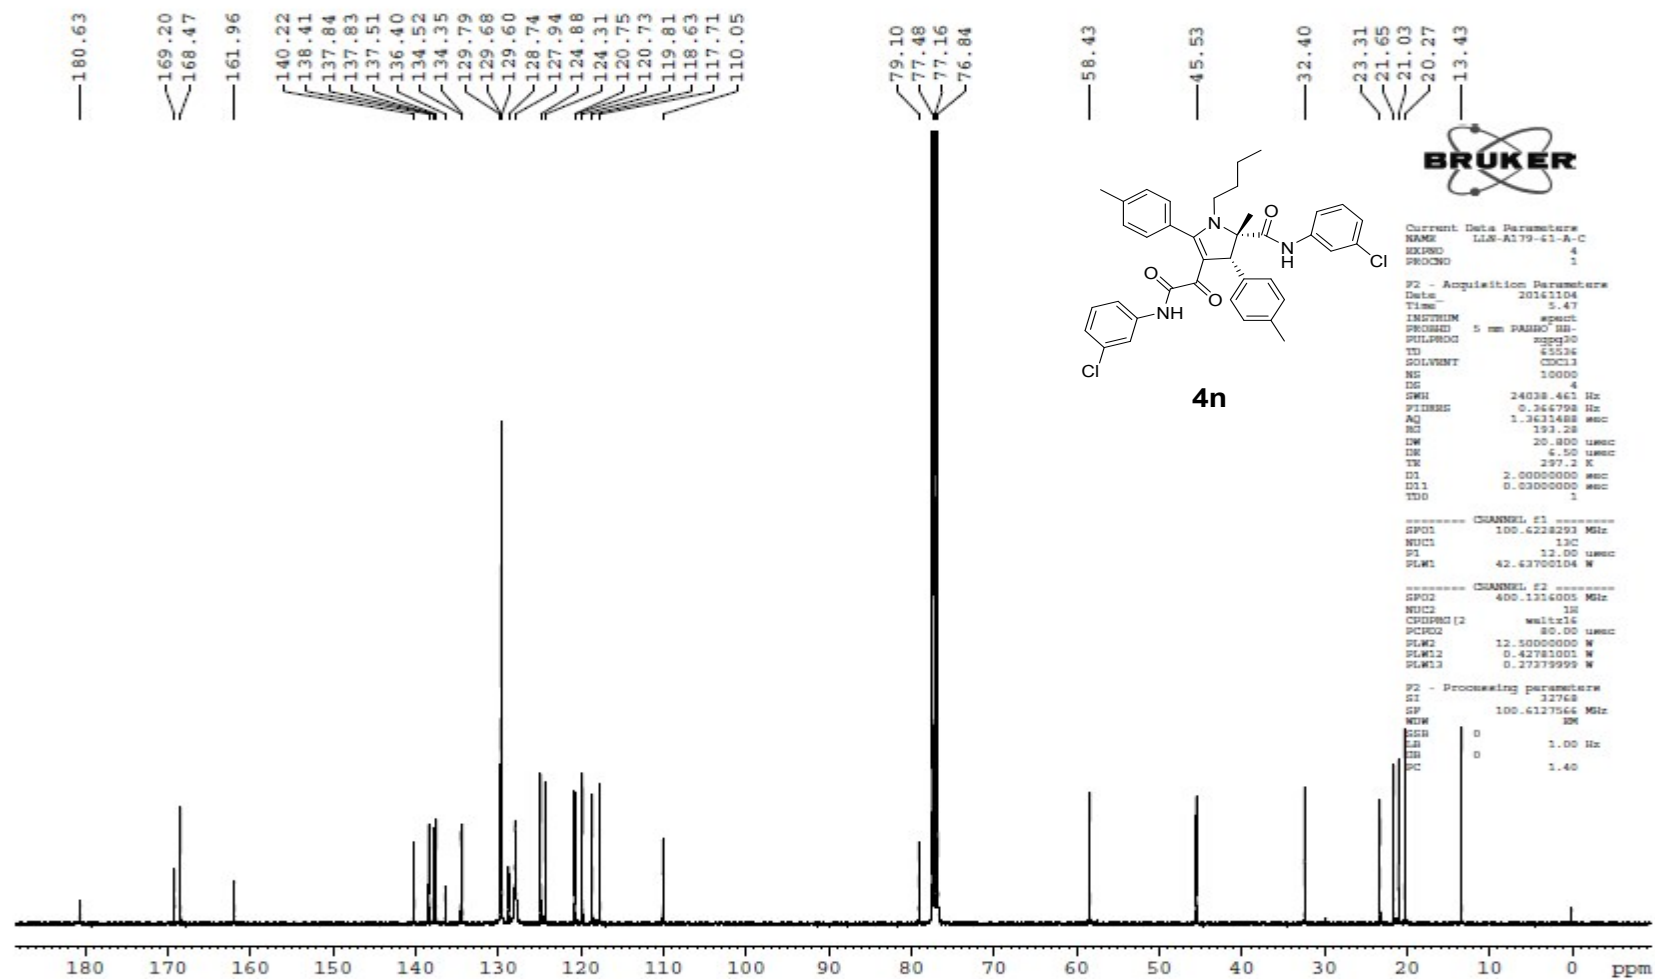

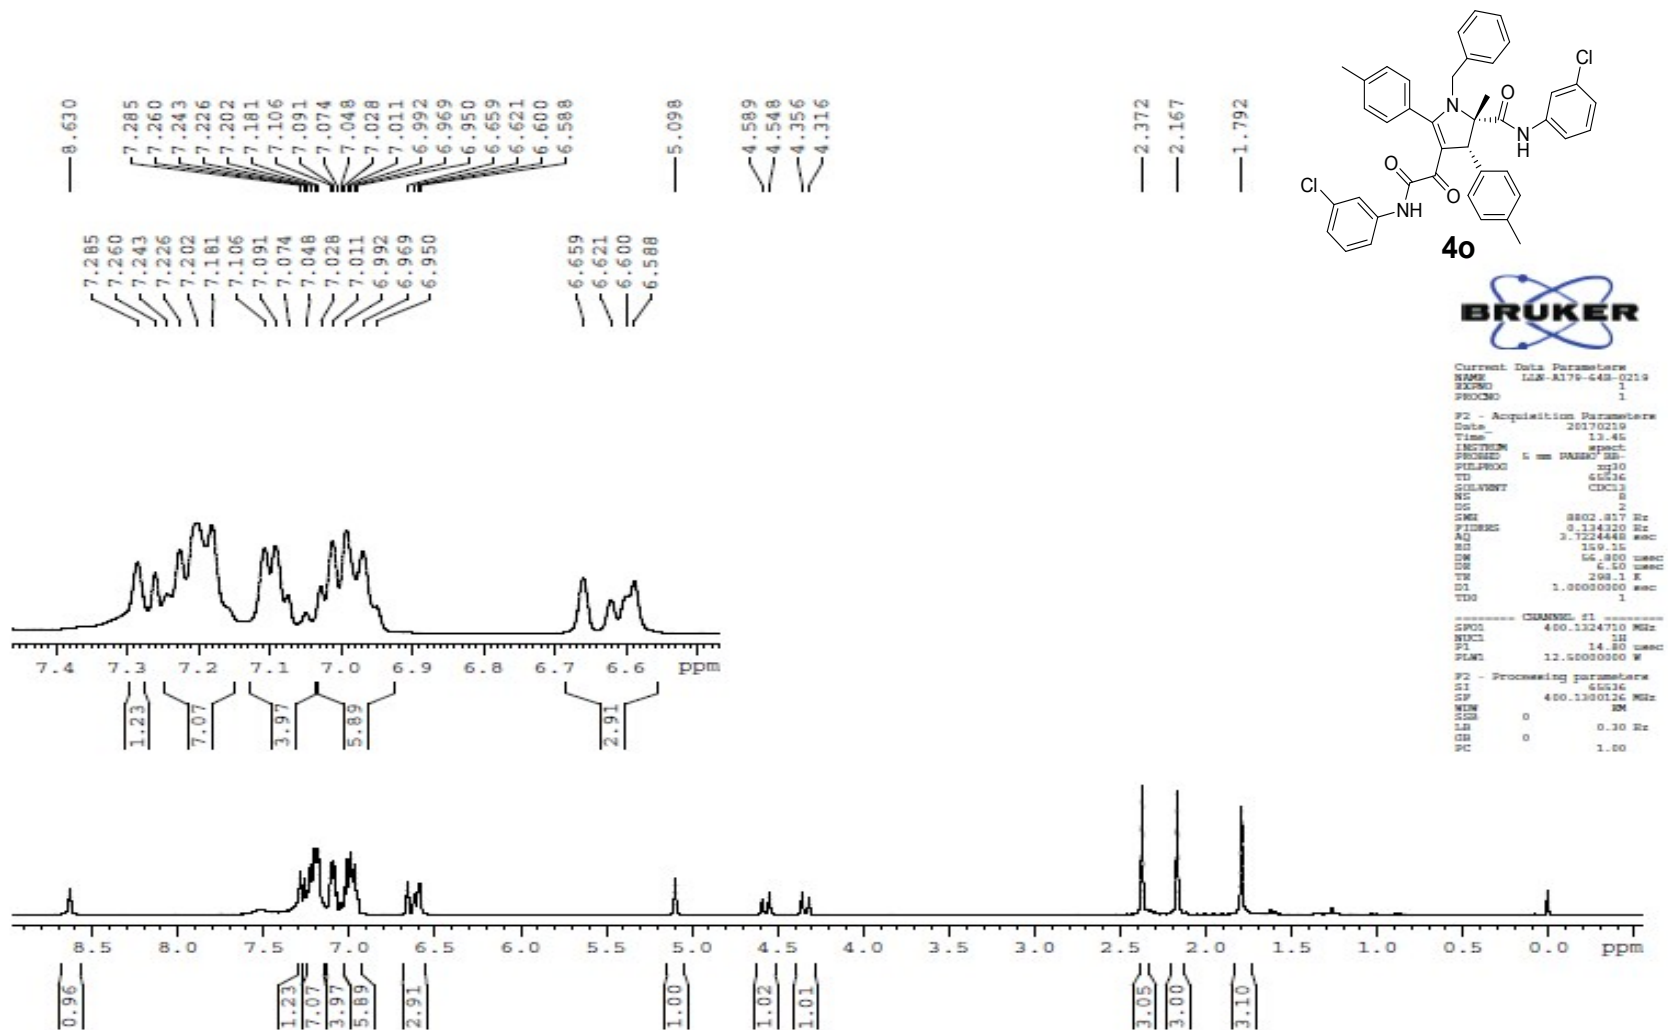

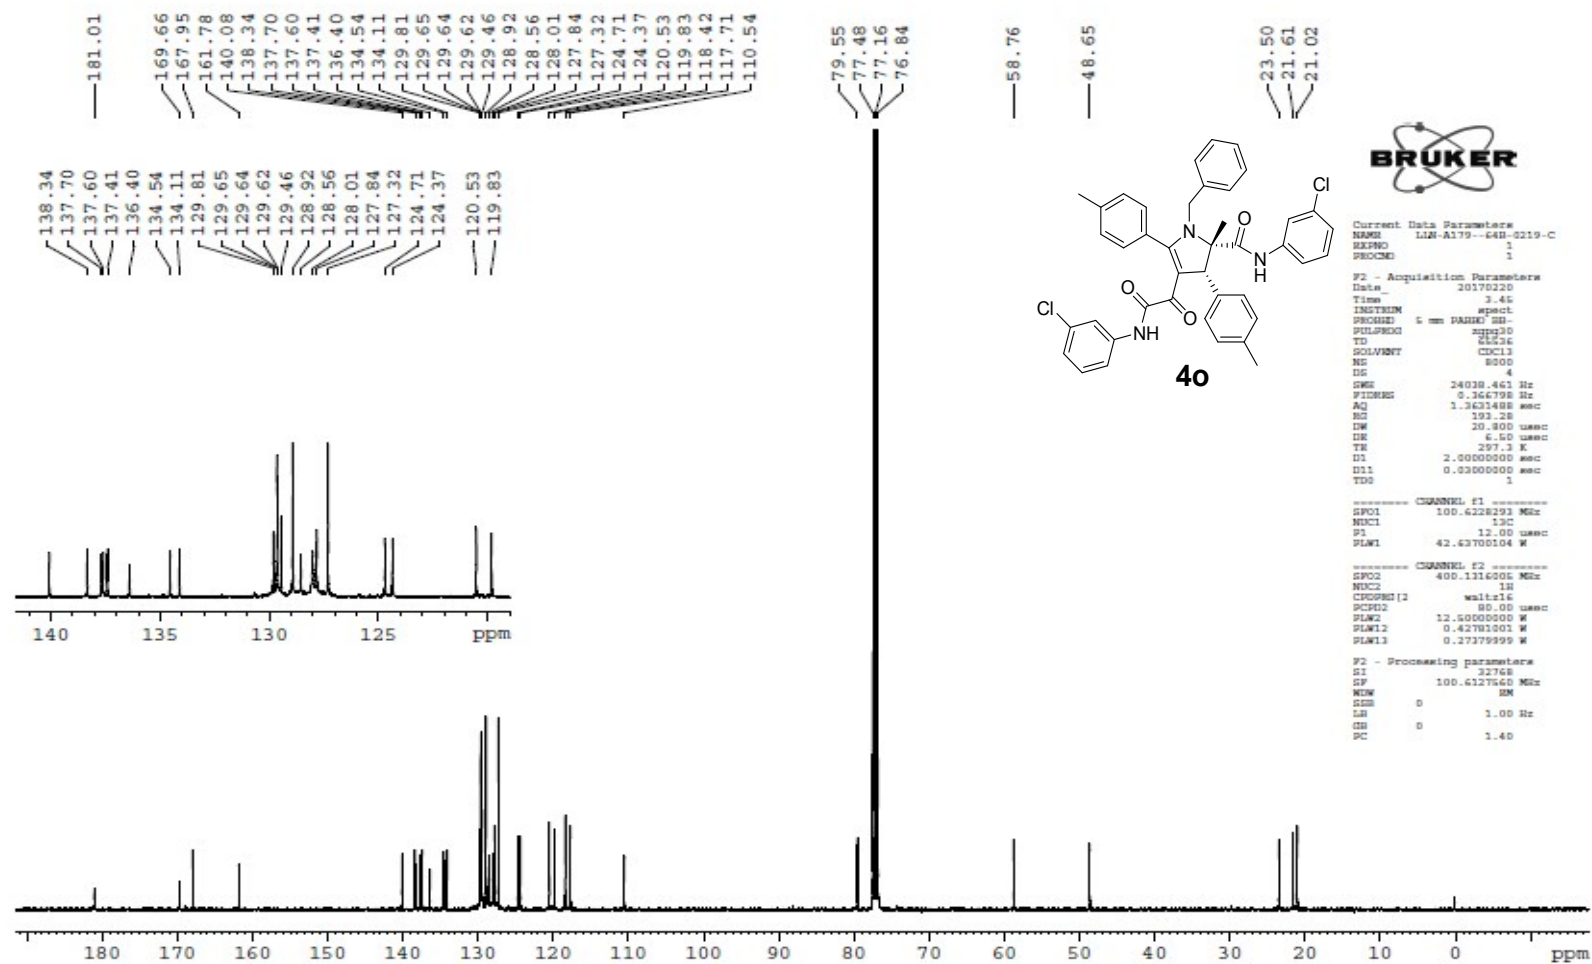

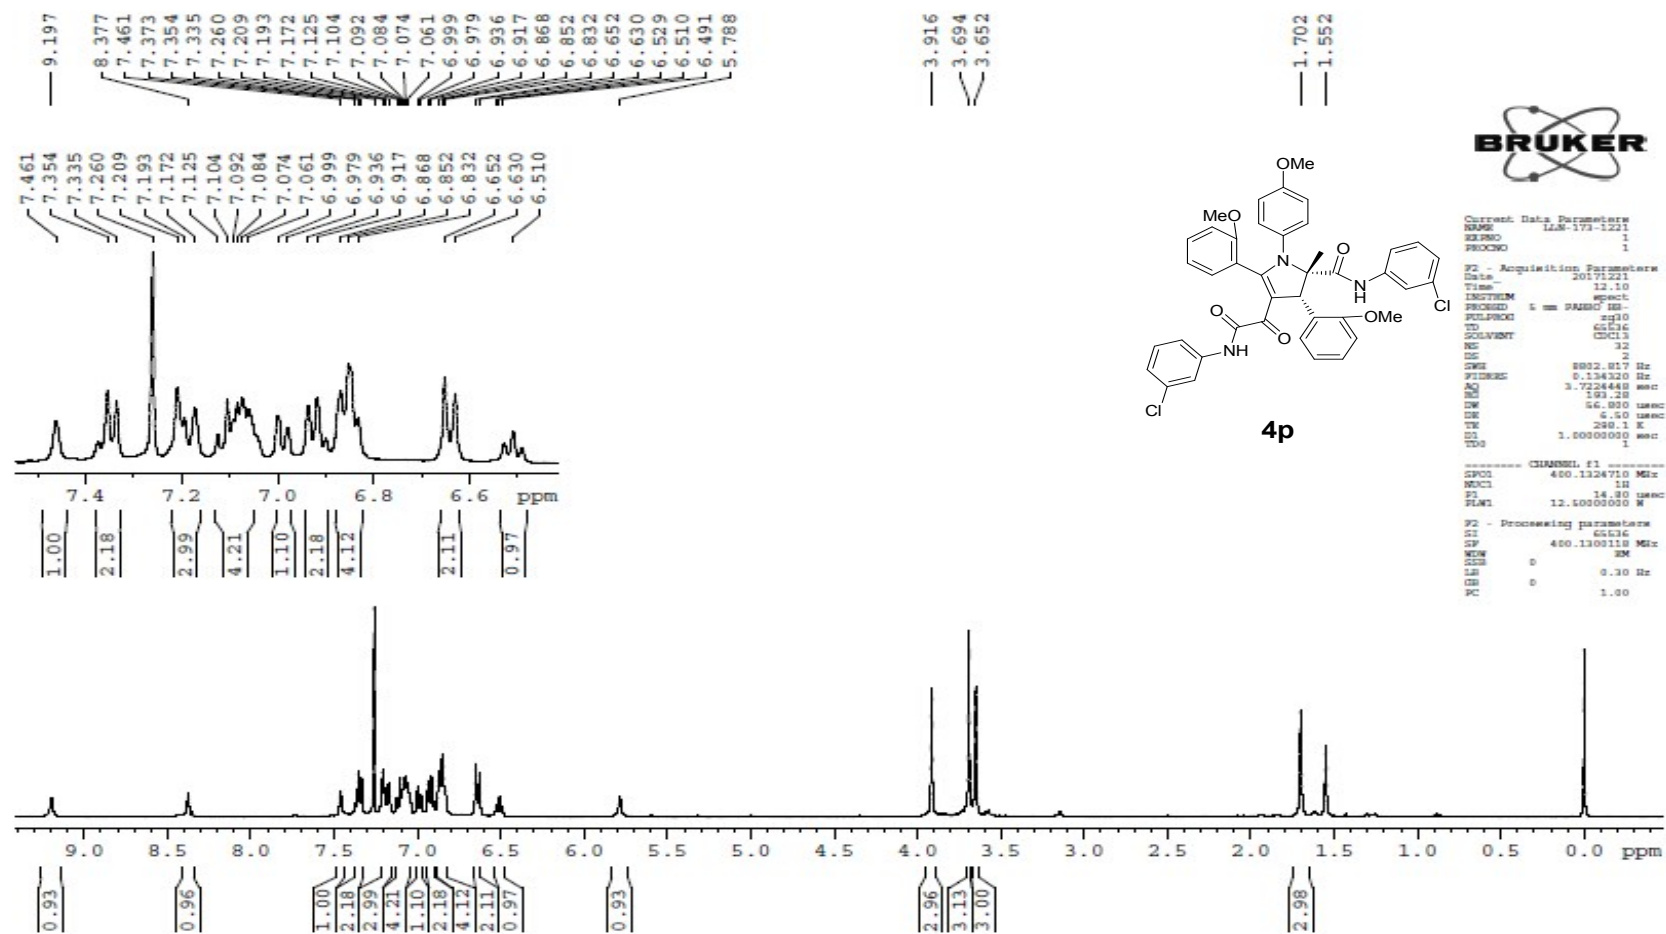

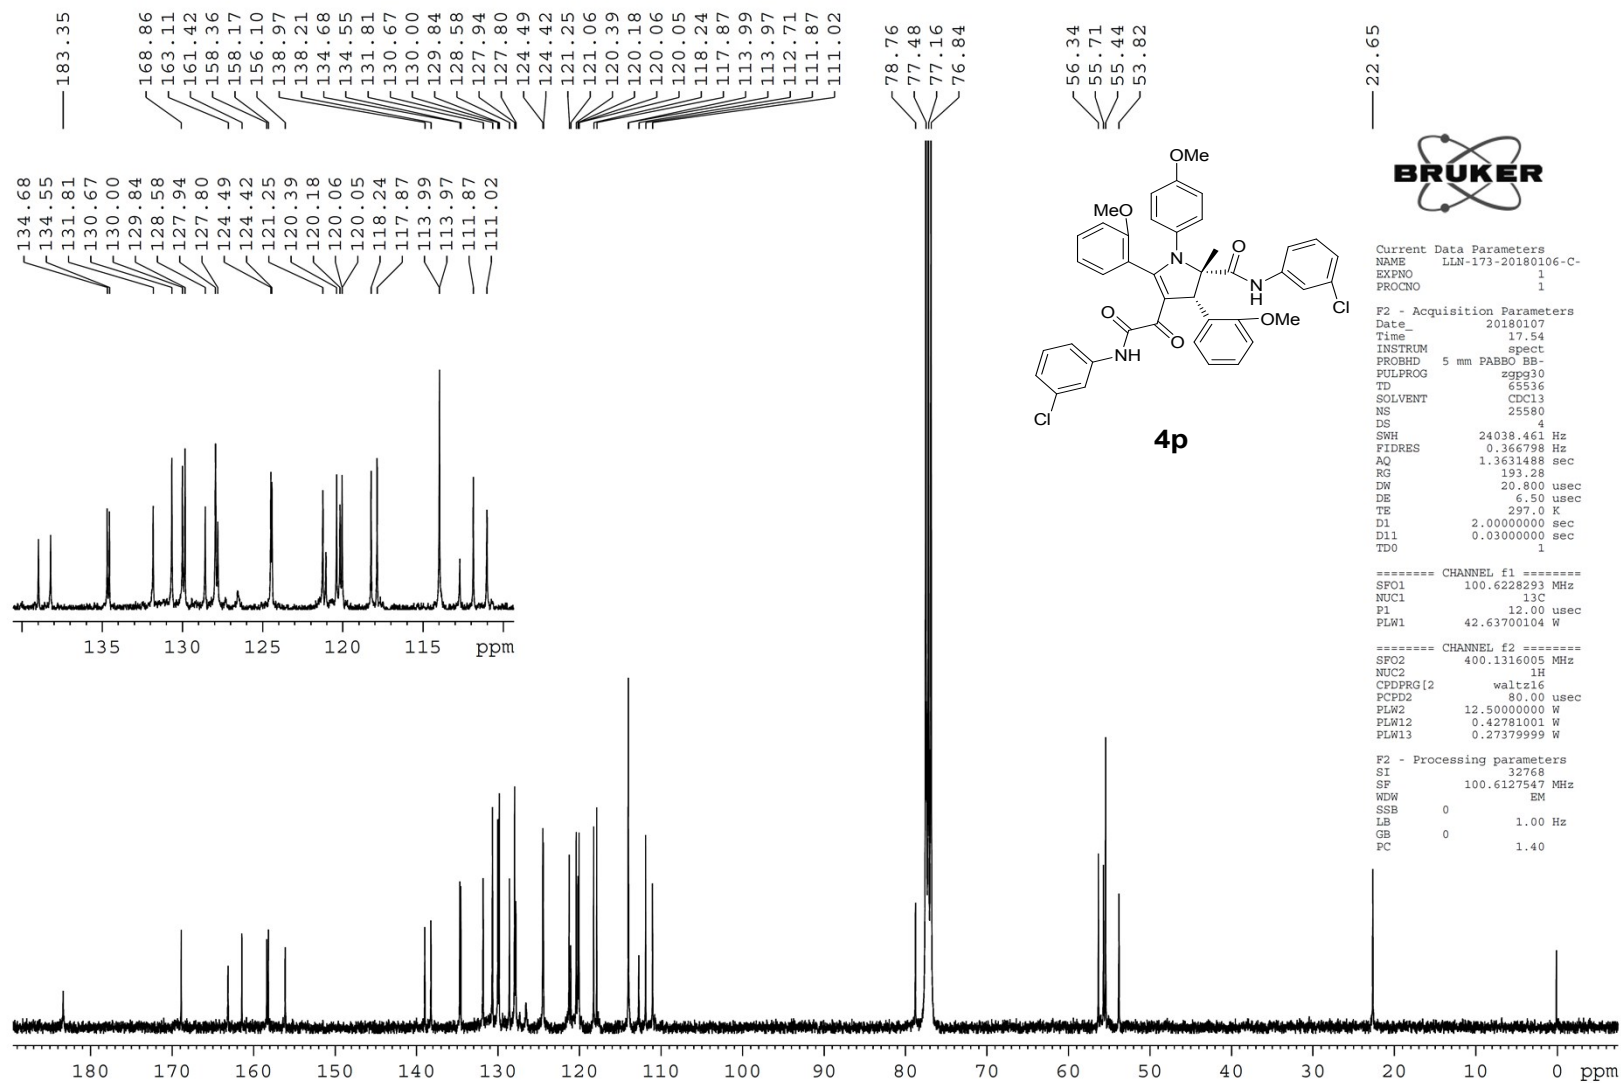

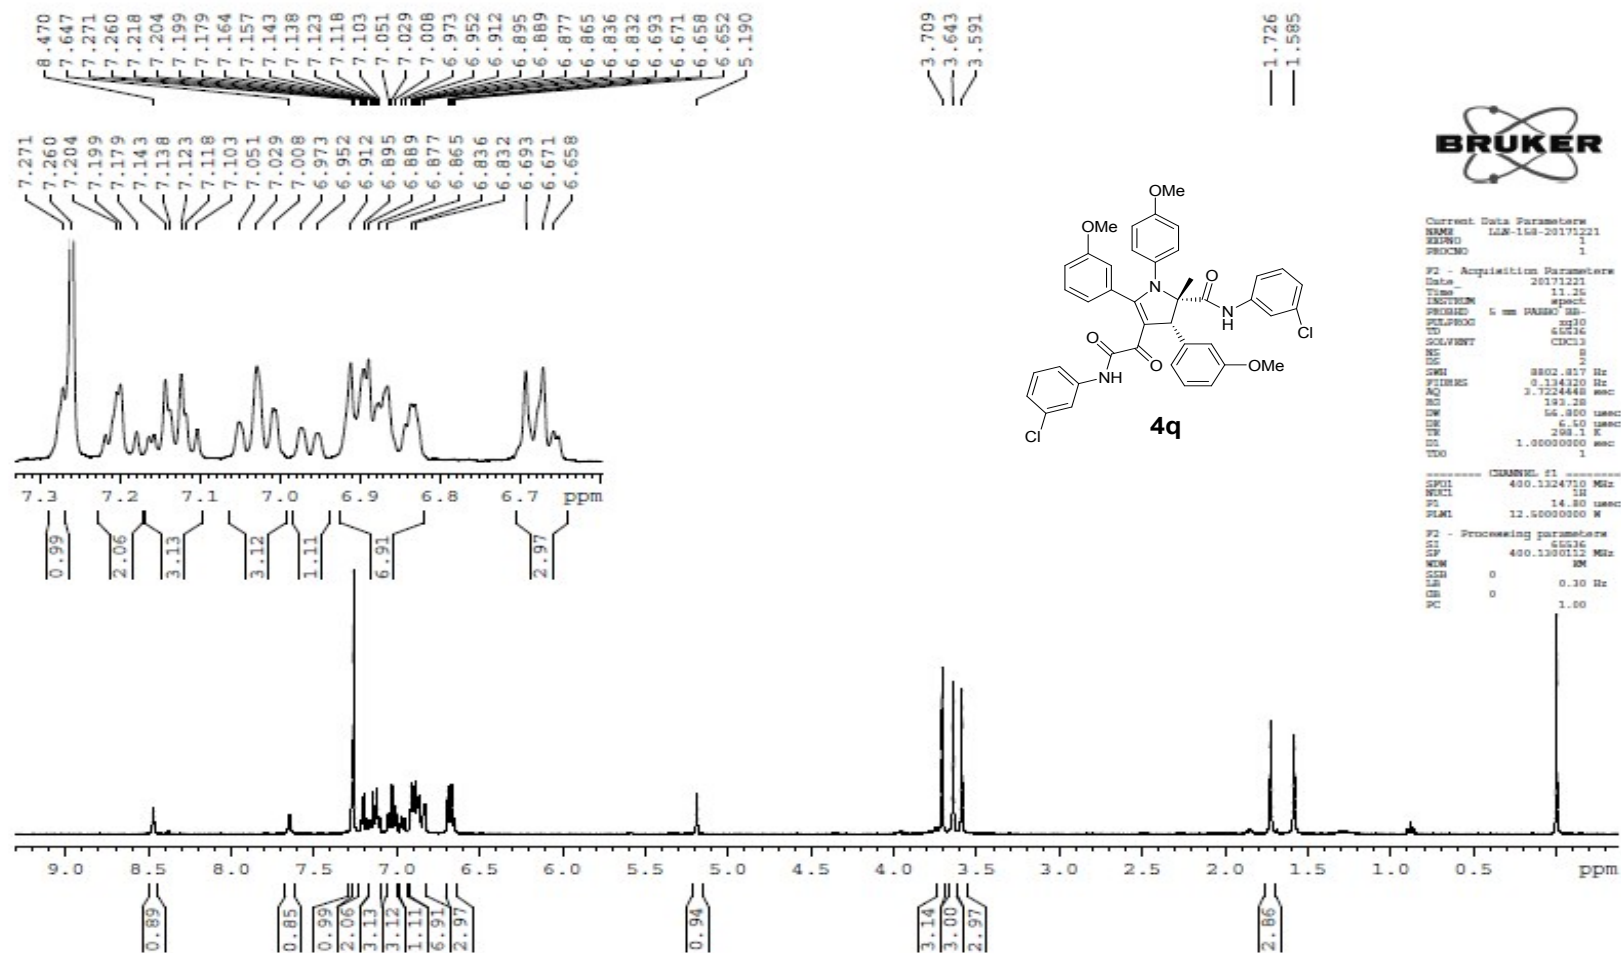



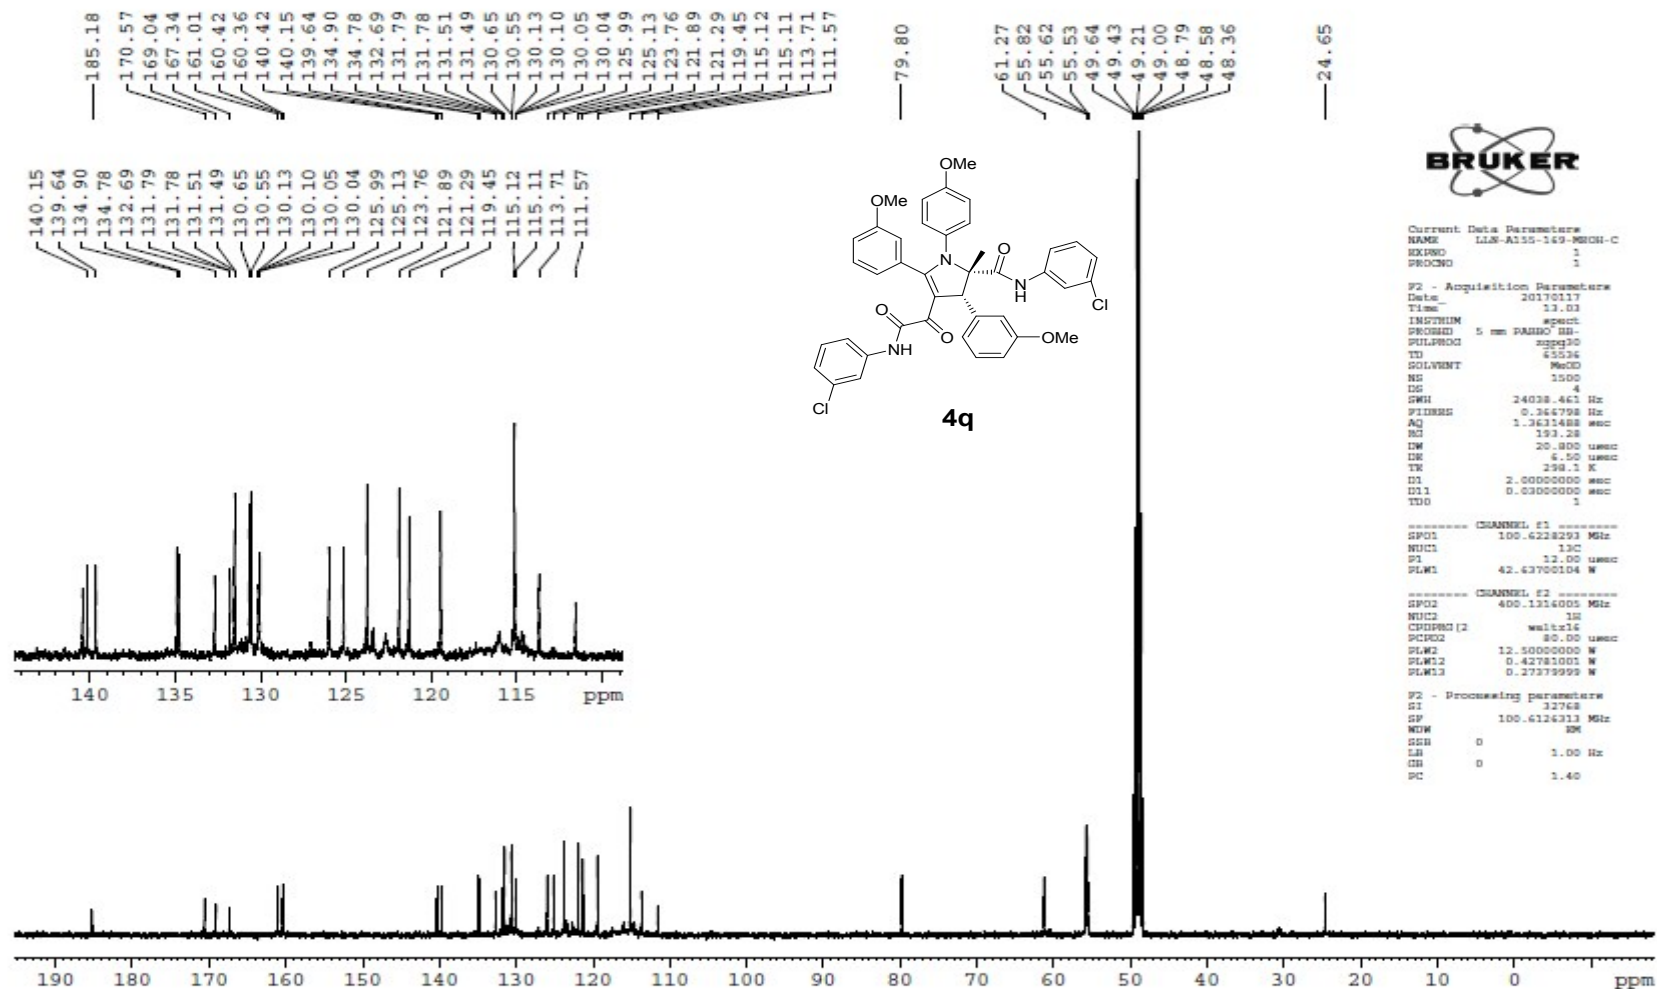

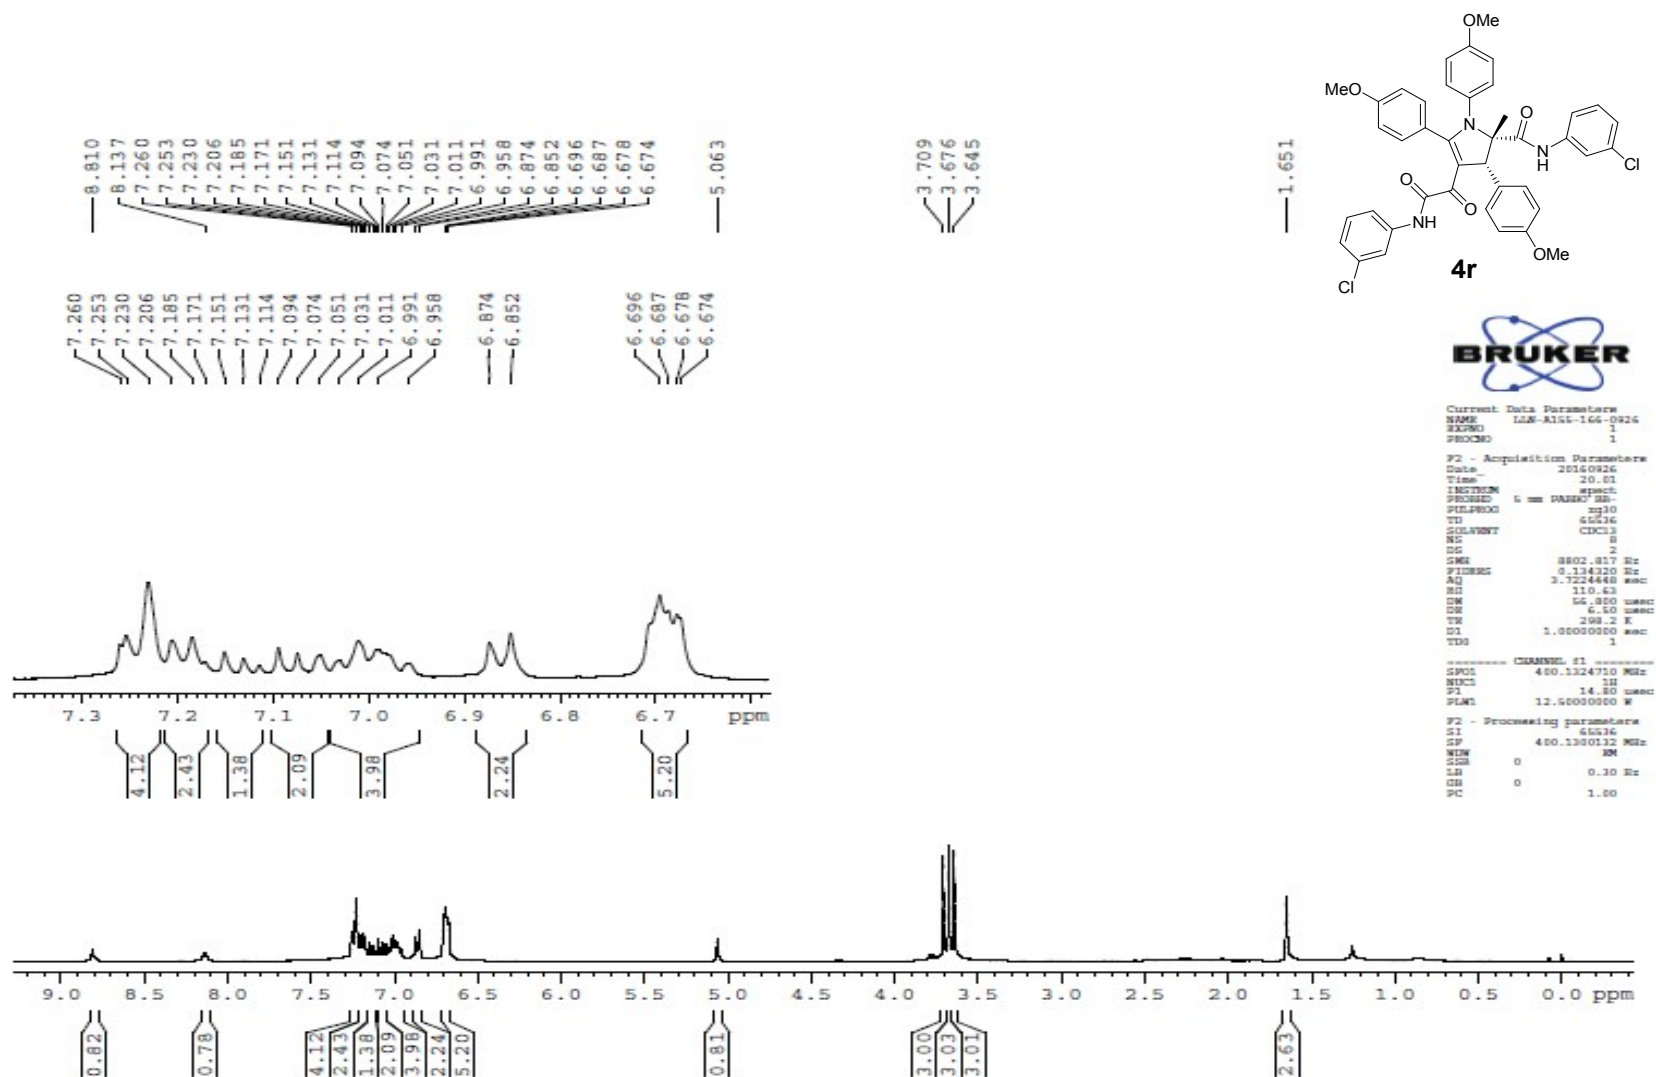



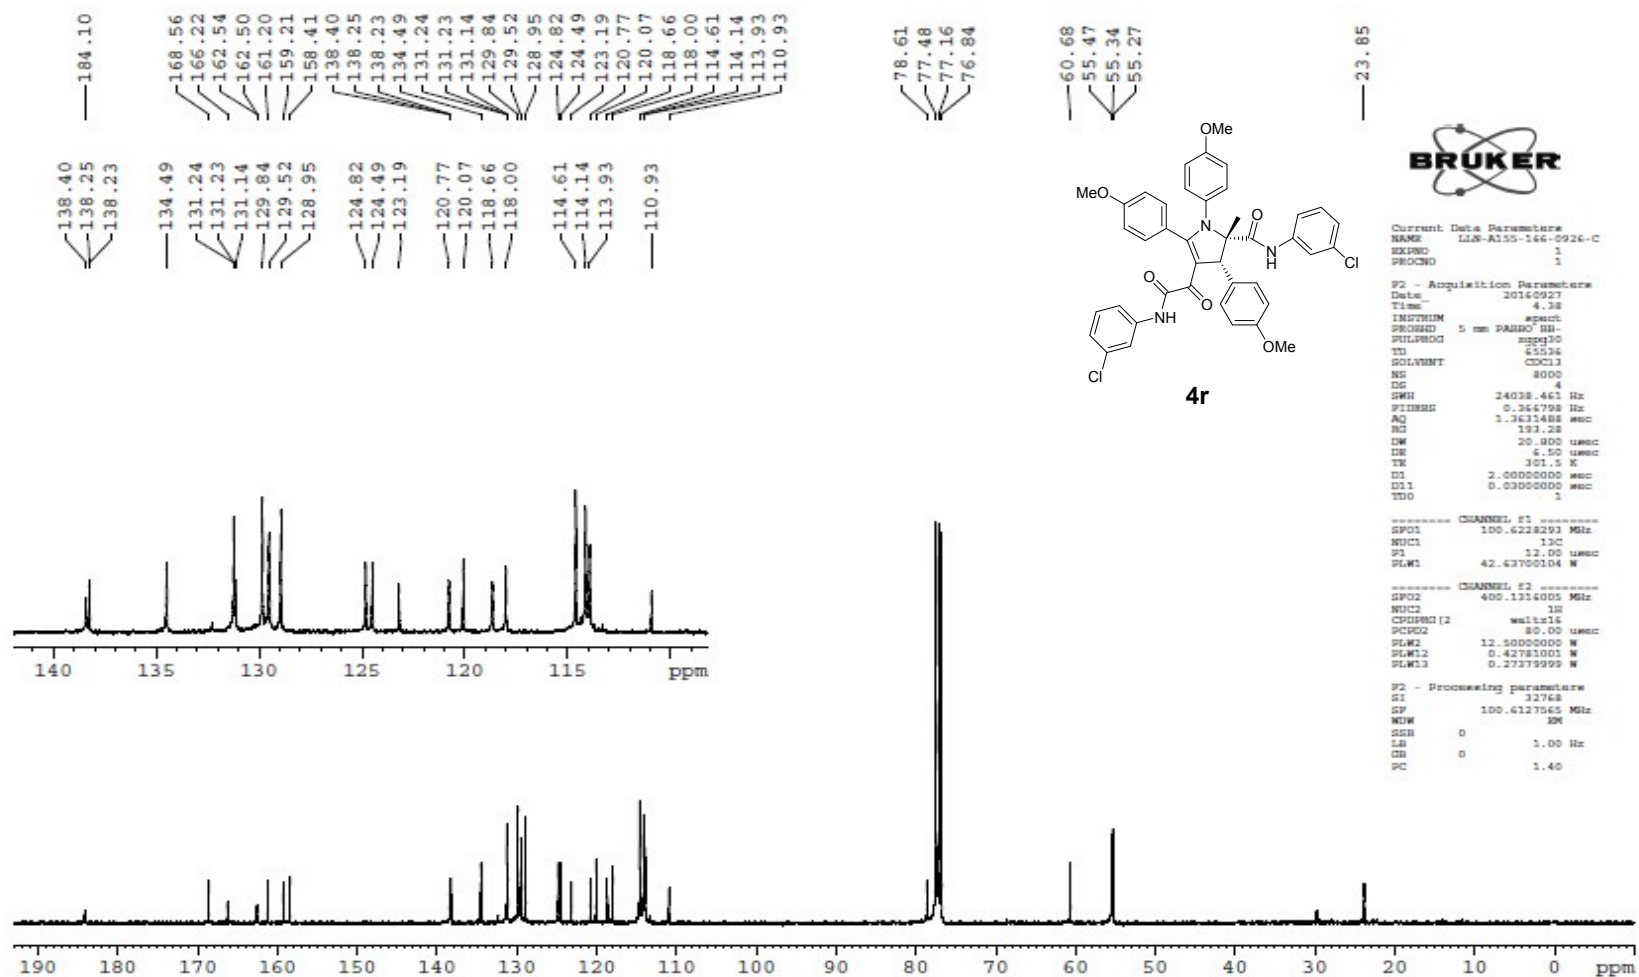

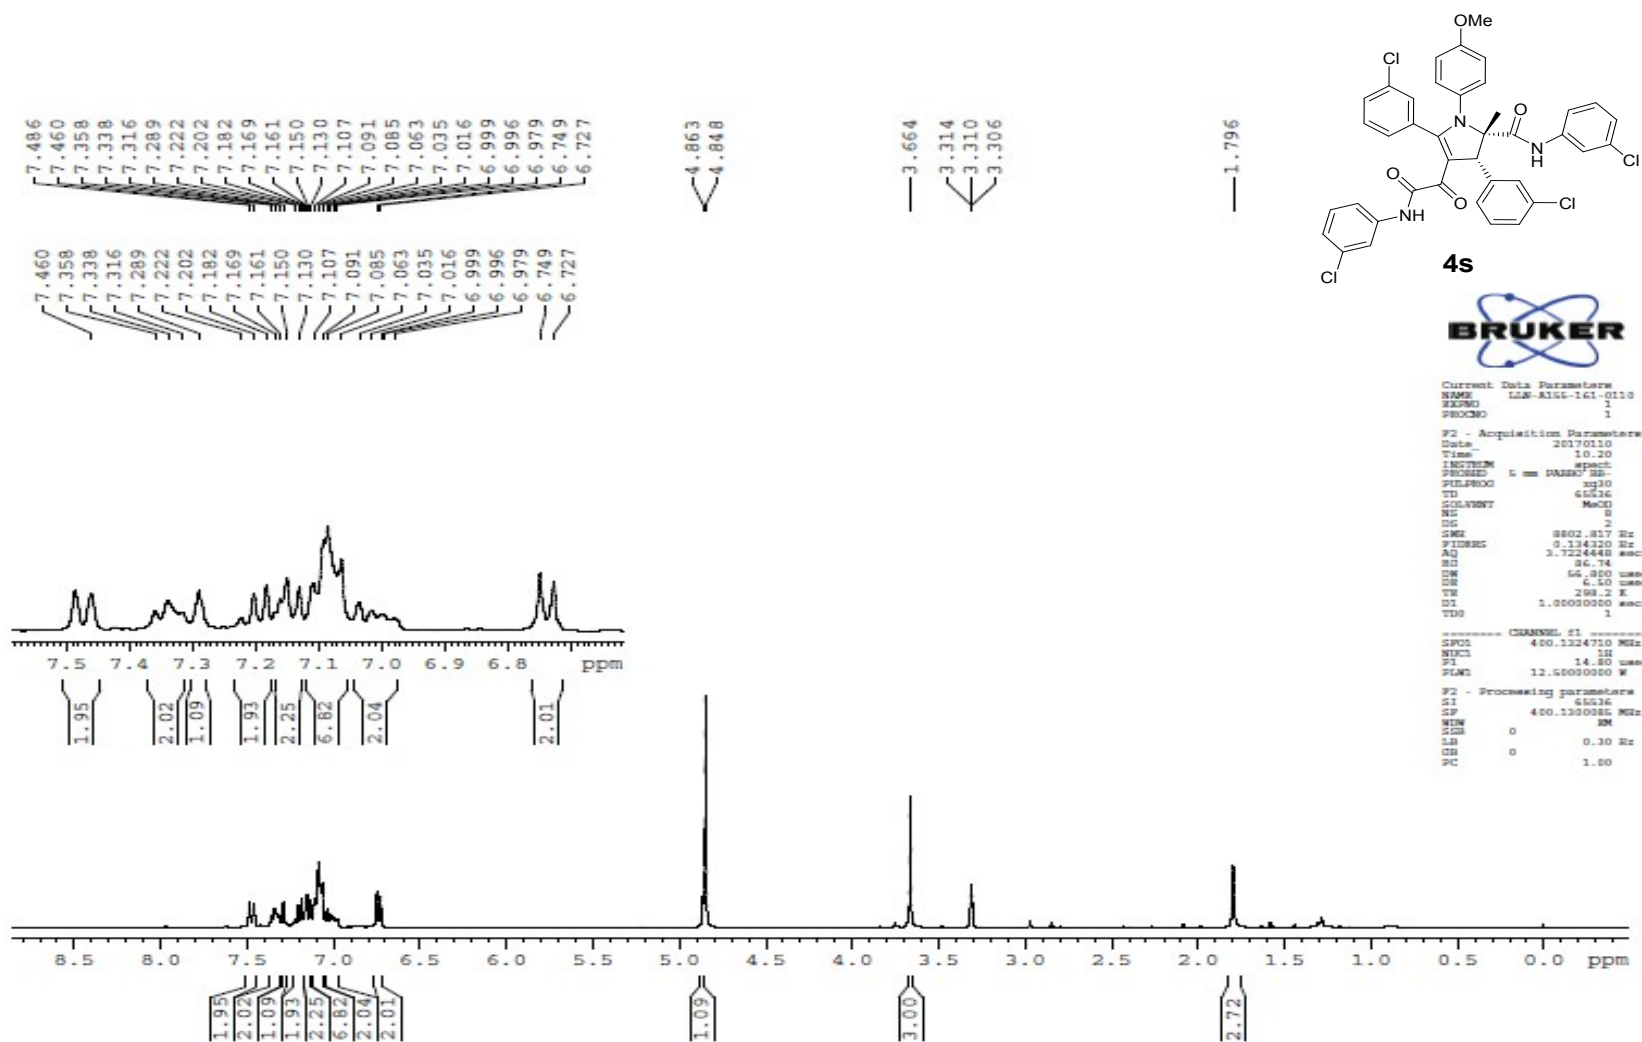

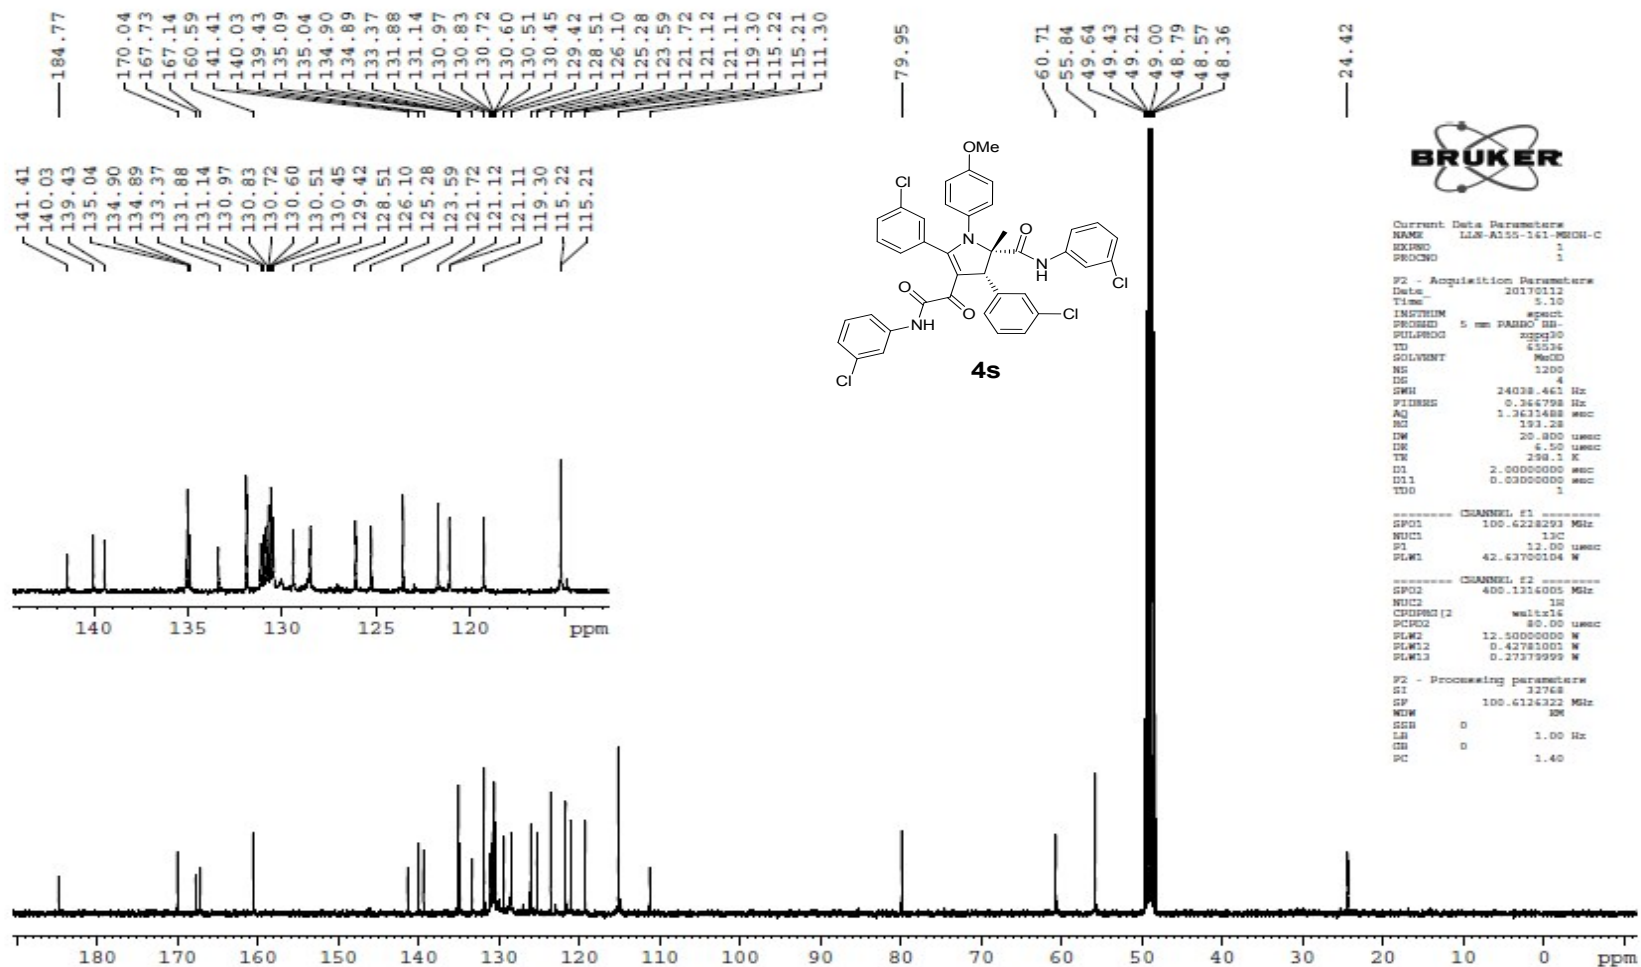

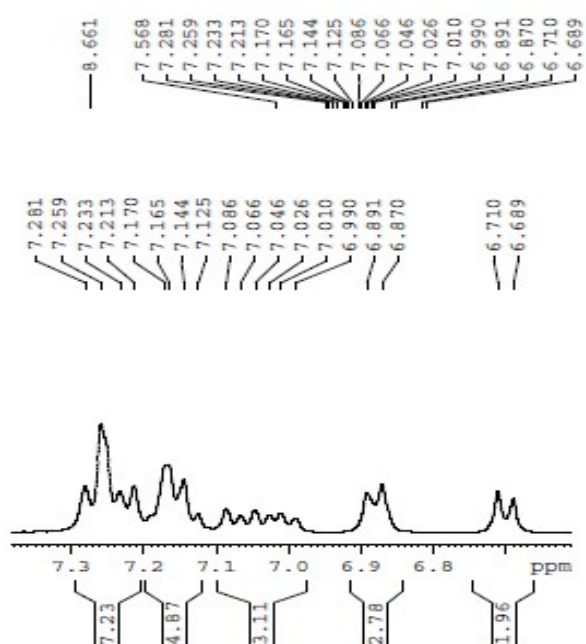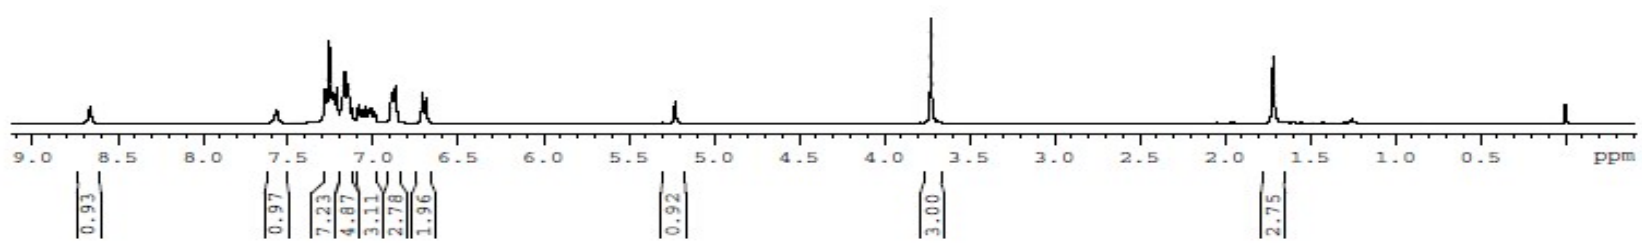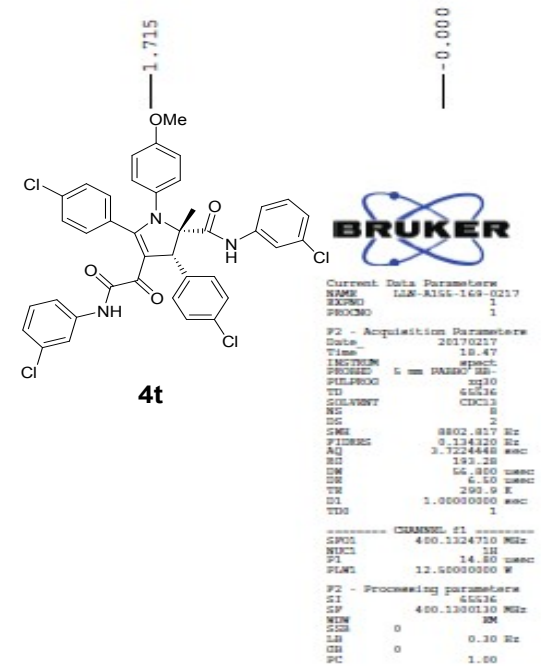

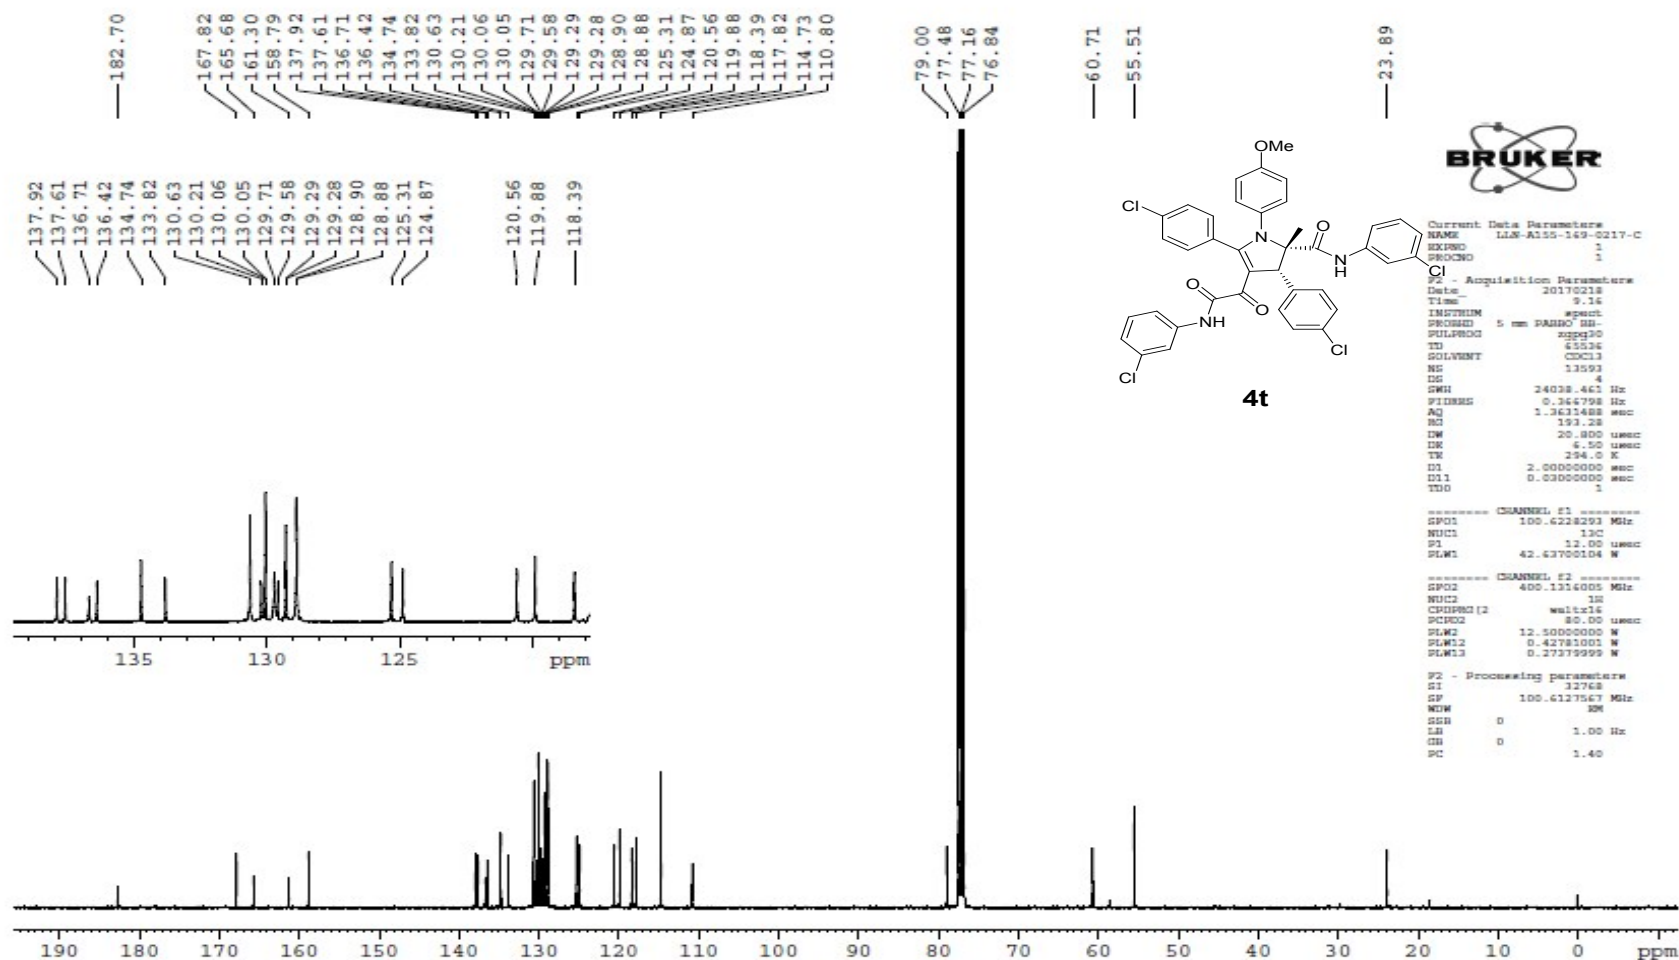

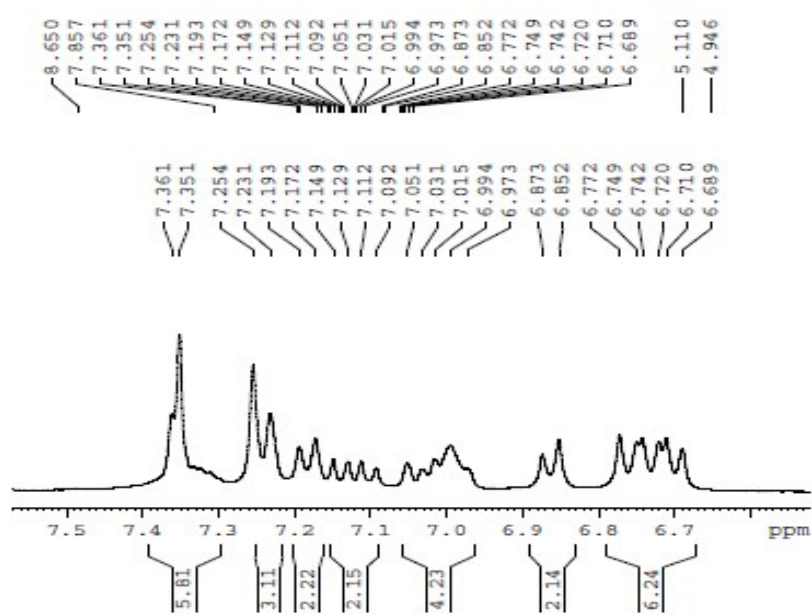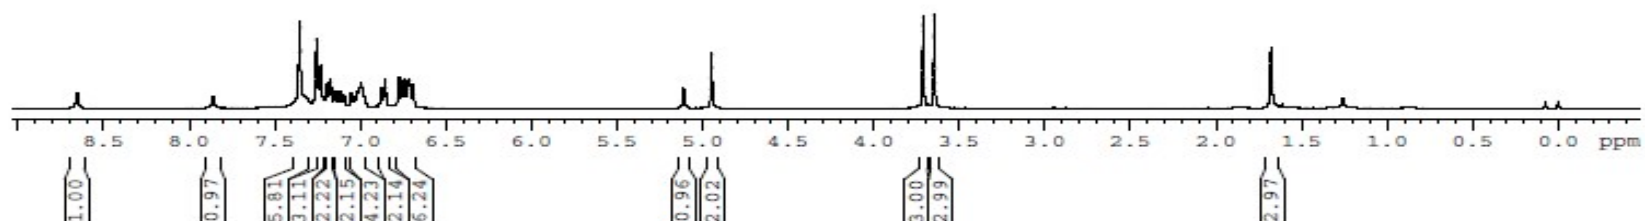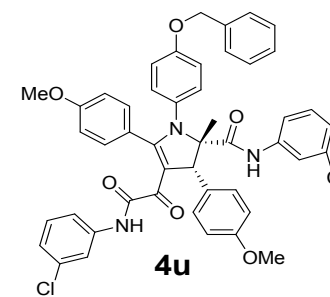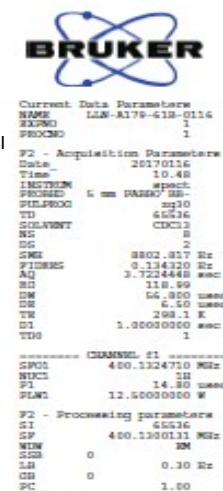



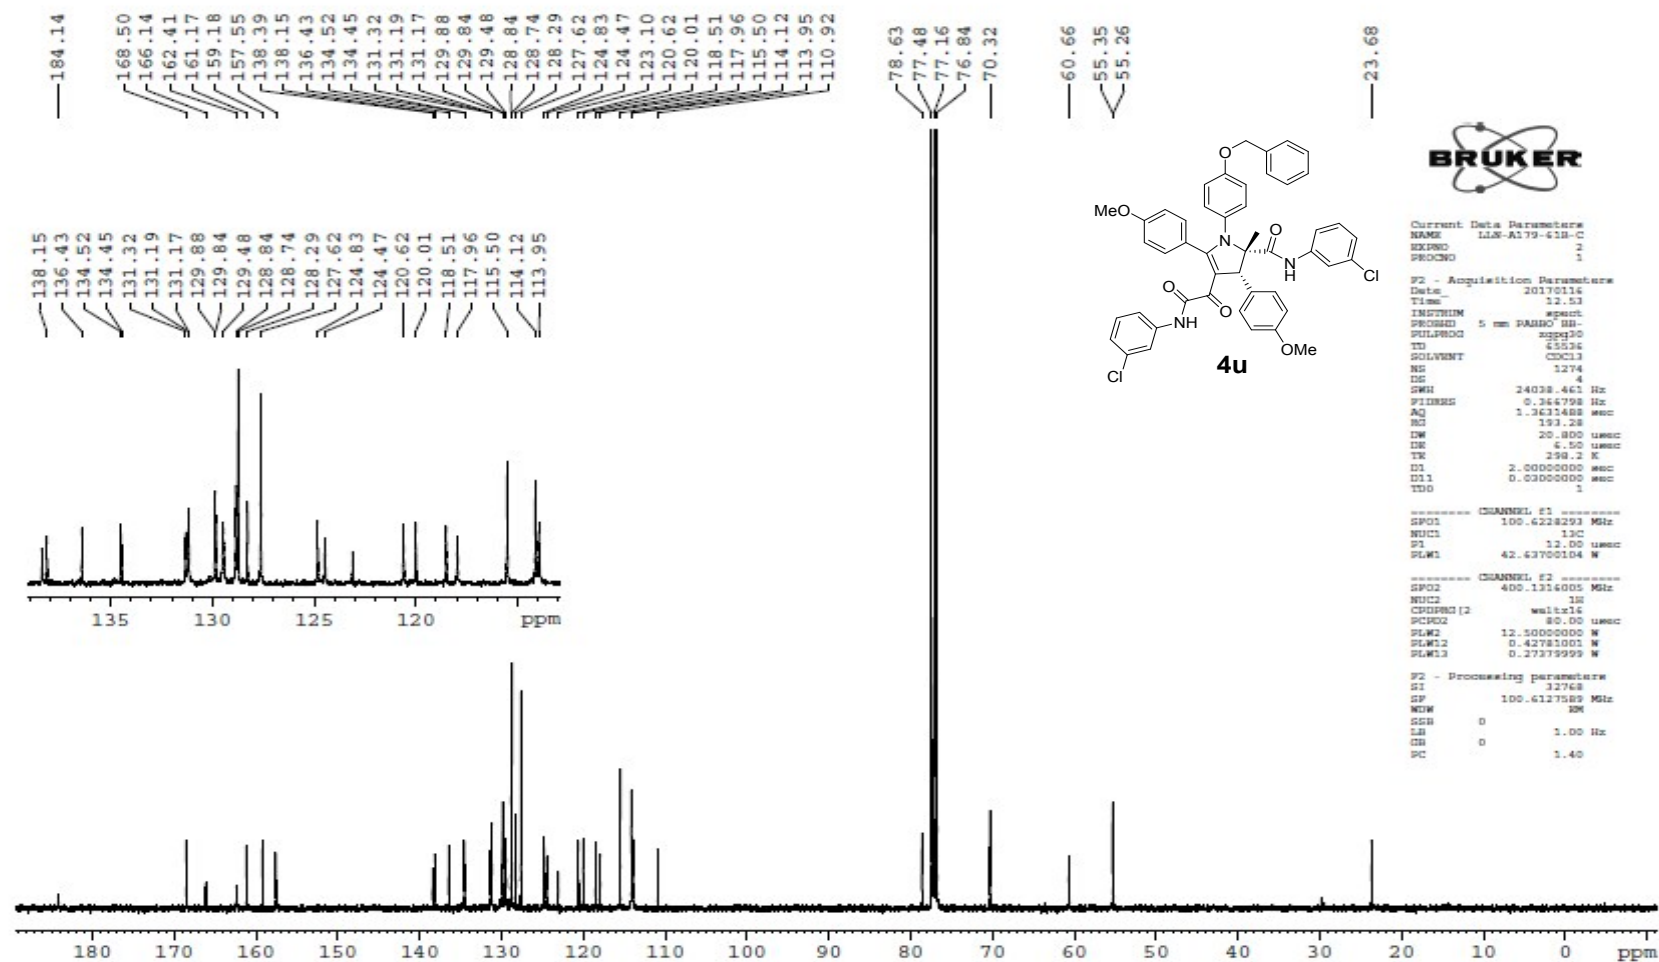

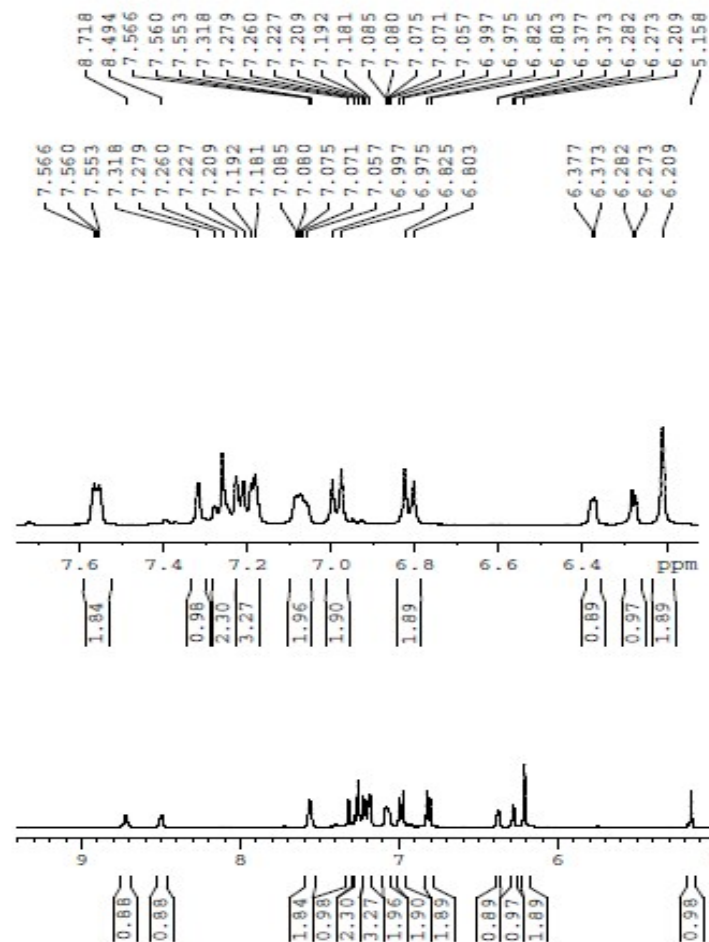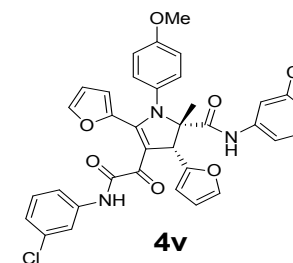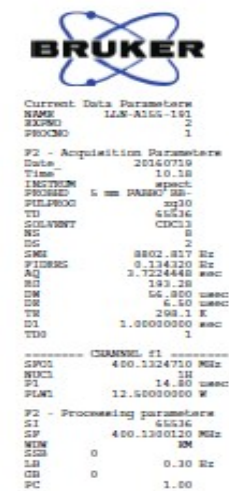





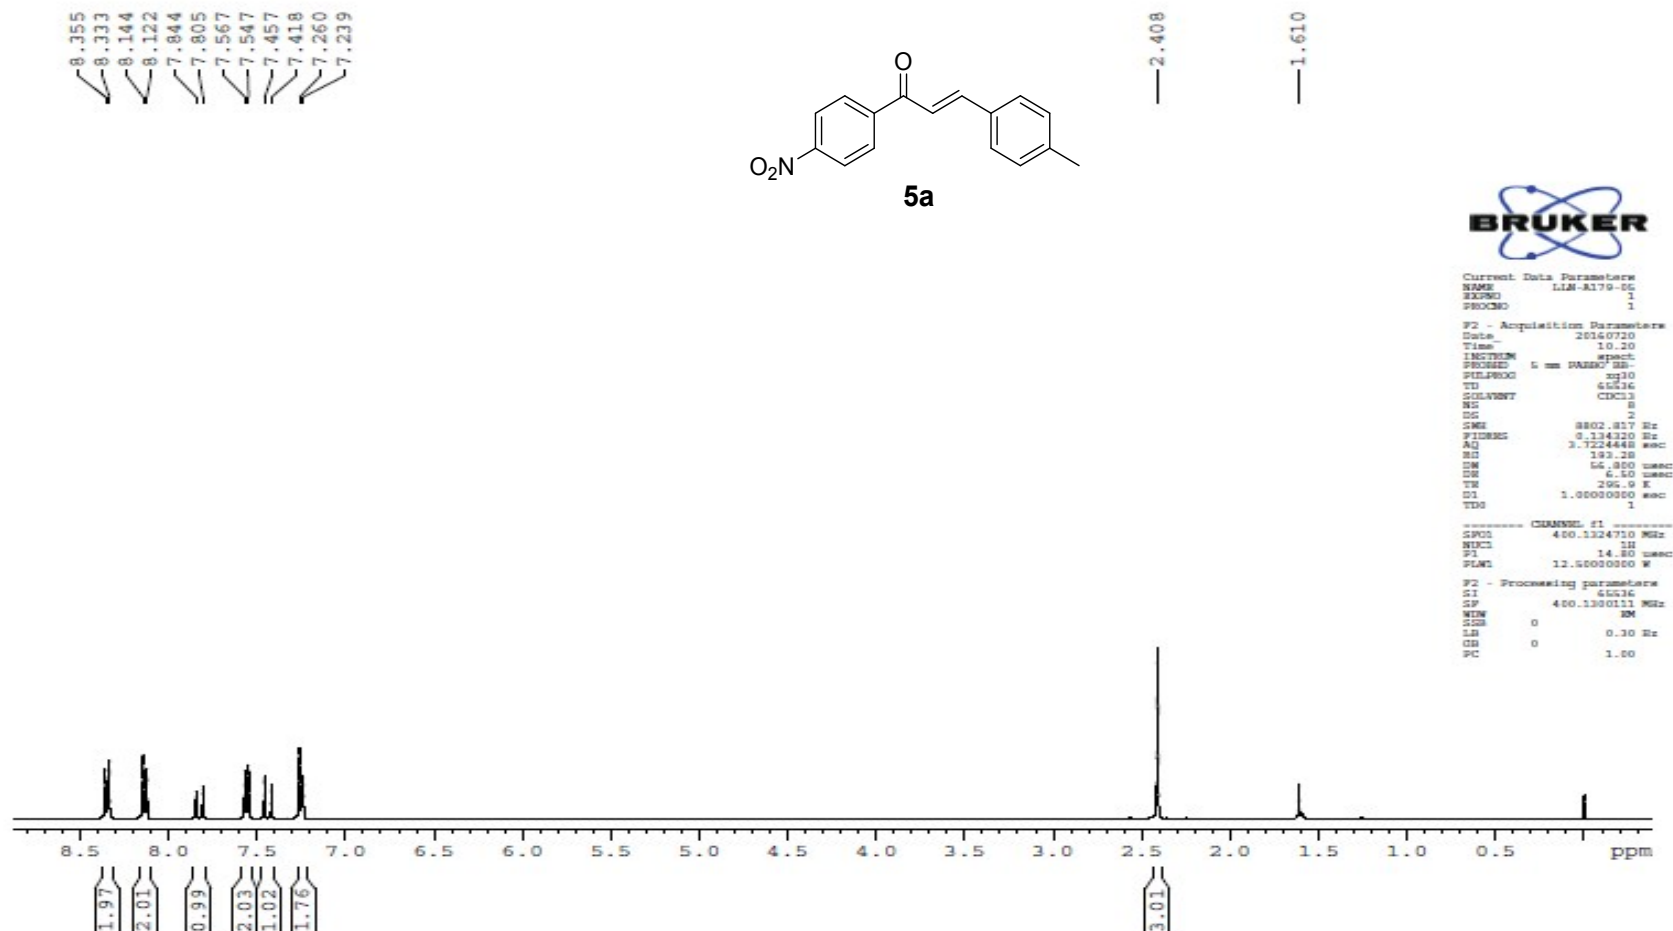

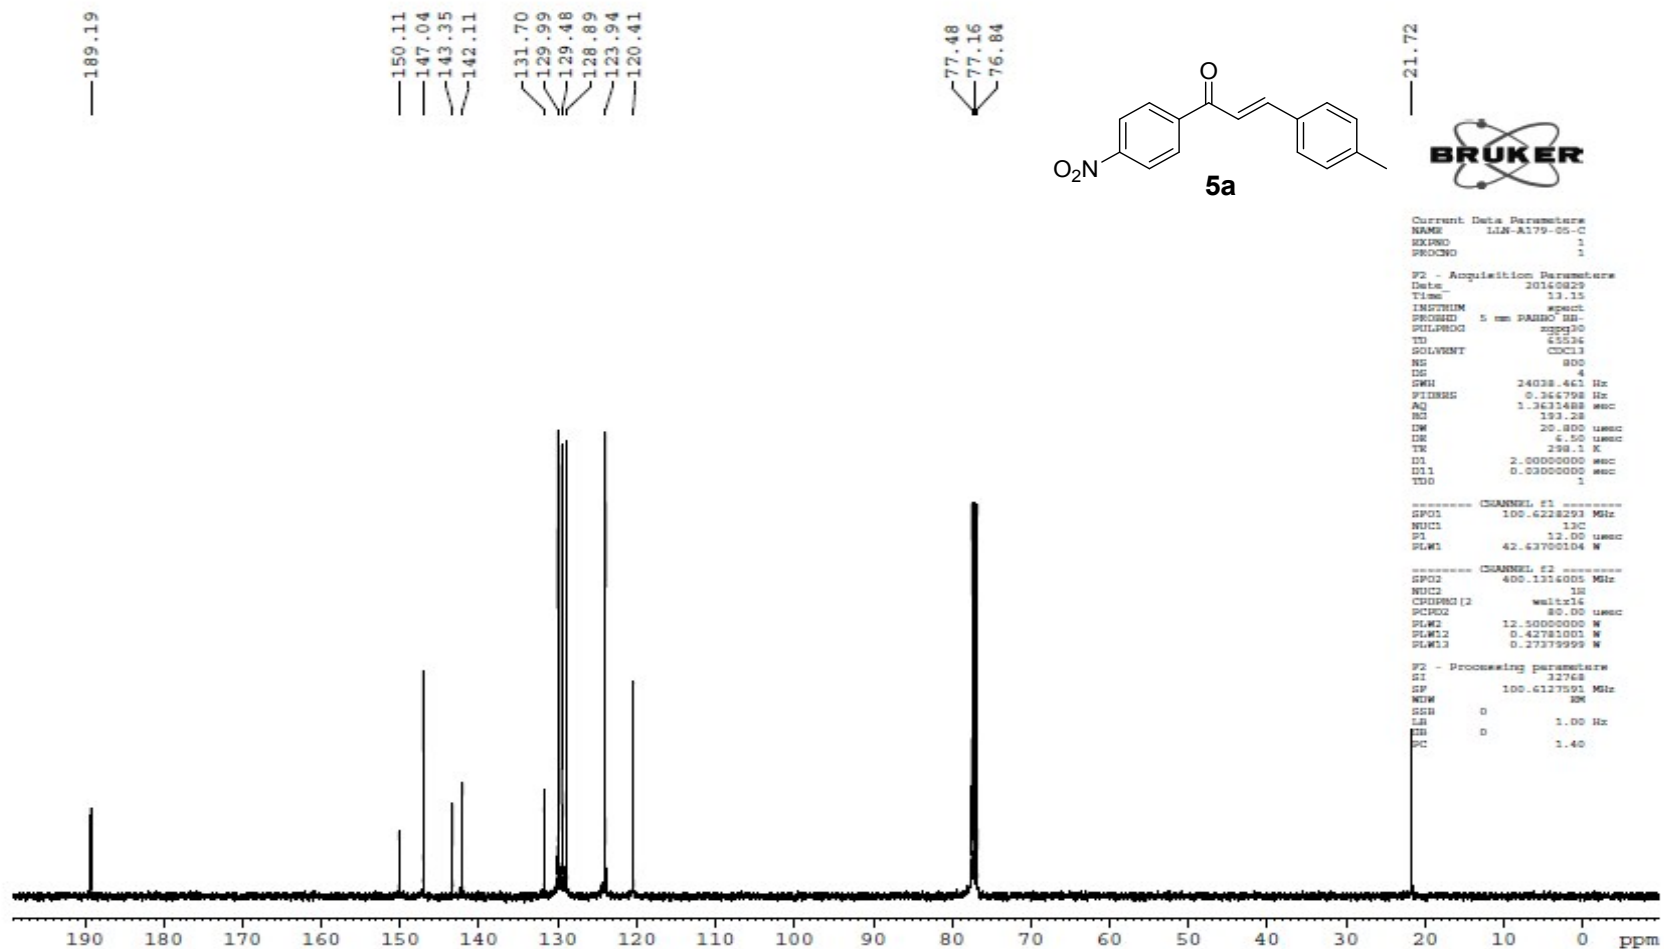

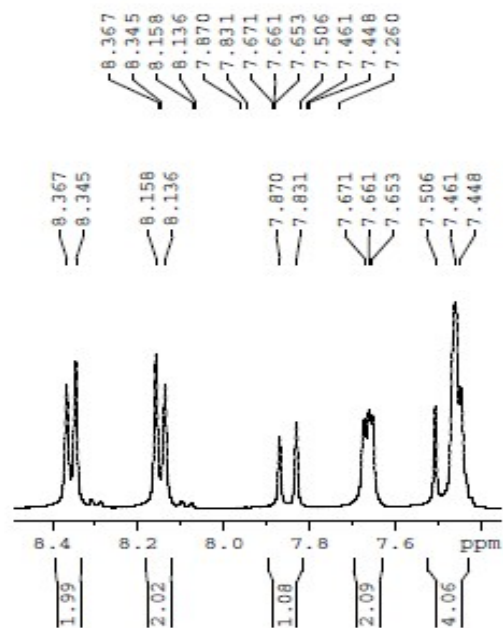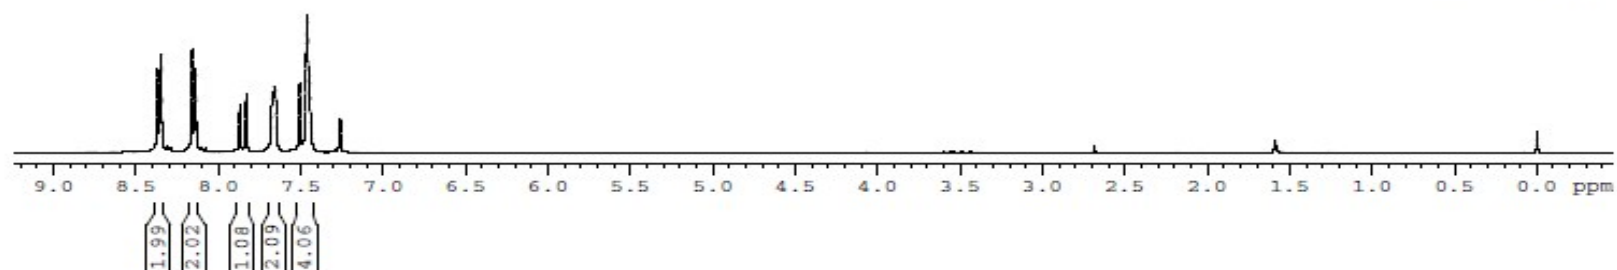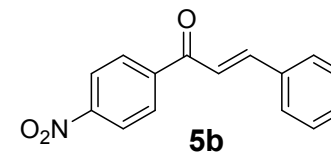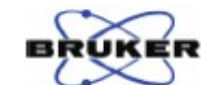

Current Data Parameters  
NAME LSK-A179-72-1215  
EXPNO 1  
PROCNO 1

F2 - Acquisition Parameters  
Date\_ 20161215  
Time 9.01  
INSTRUM spect  
PROBHD 5 mm HANCEV SB-  
PULPROG zg30  
TD 65536  
SOLVENT CDCl3  
NS 8  
DS 2  
SWH 8802.817 Hz  
FIDRES 0.134320 Hz  
AQ 3.7224448 sec  
RG 192.38  
SD 192.38  
DM 64.800 usec  
DE 6.50 usec  
TE 294.7 K  
D1 1.00000000 sec  
TD0 1

===== CHANNEL f1 =====  
NUC1 400.1324710 MHz  
NUC2 1H  
P1 14.80 usec  
PLA1 12.50000000 W

F2 - Processing parameters  
SI 65536  
SF 400.1300124 MHz  
WDW RM  
SSB 0  
LB 0.30 Hz  
GB 0  
PC 1.00

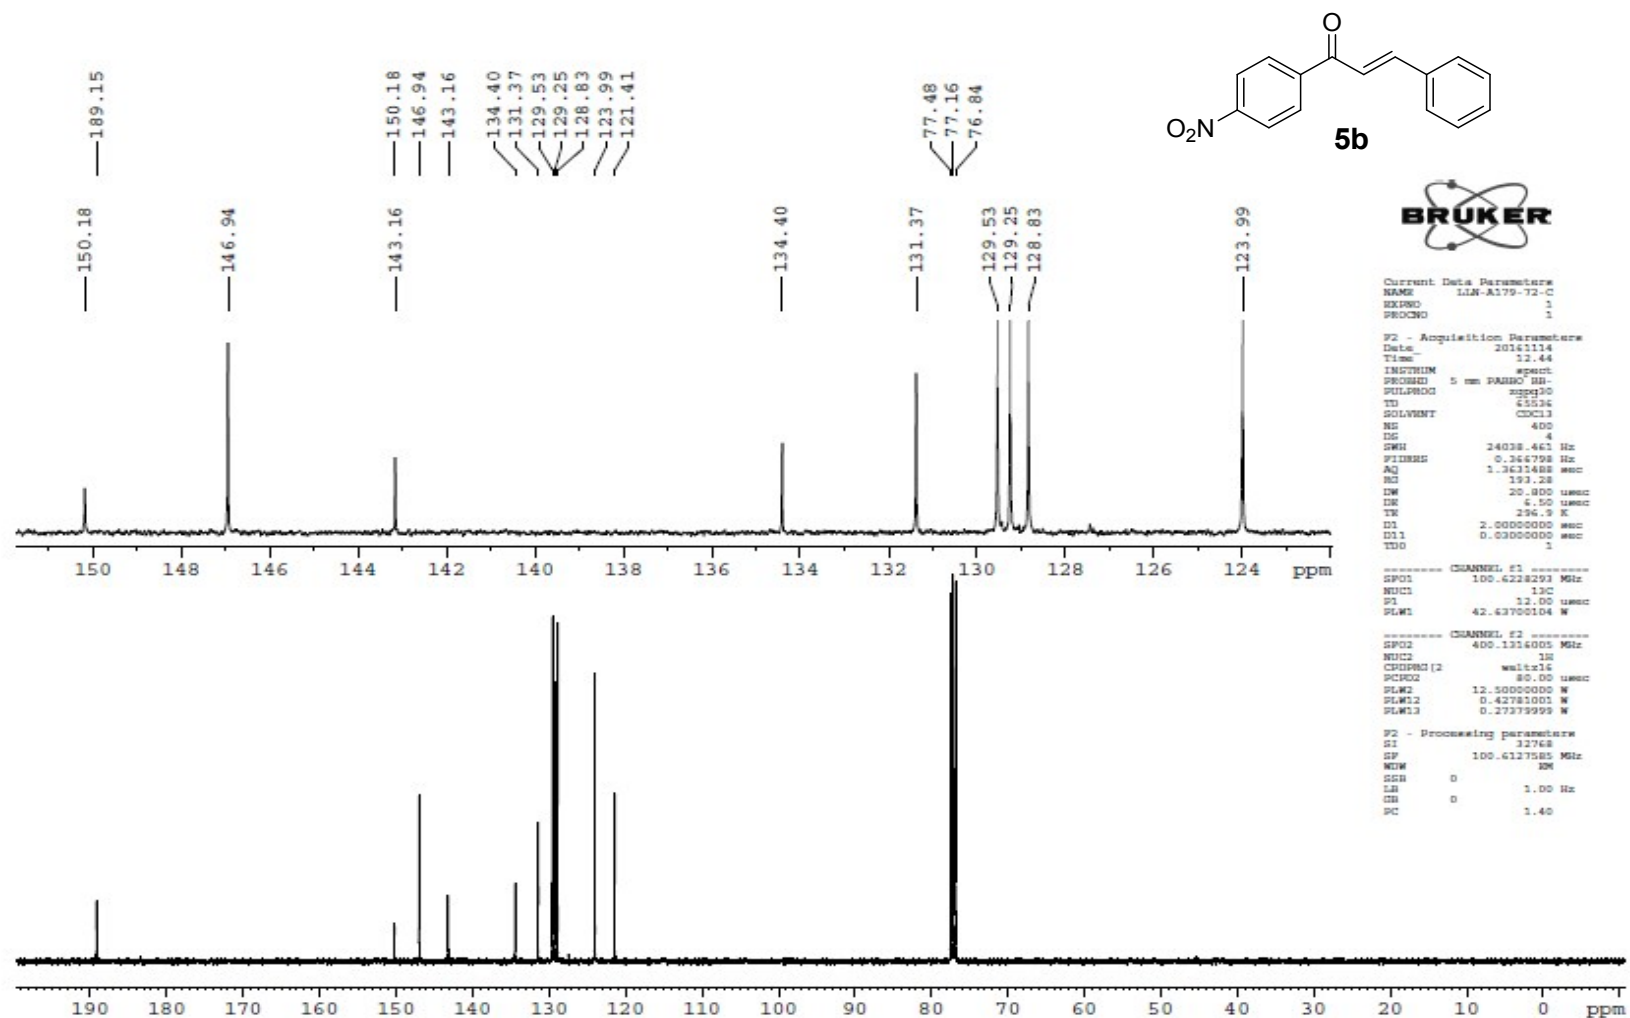

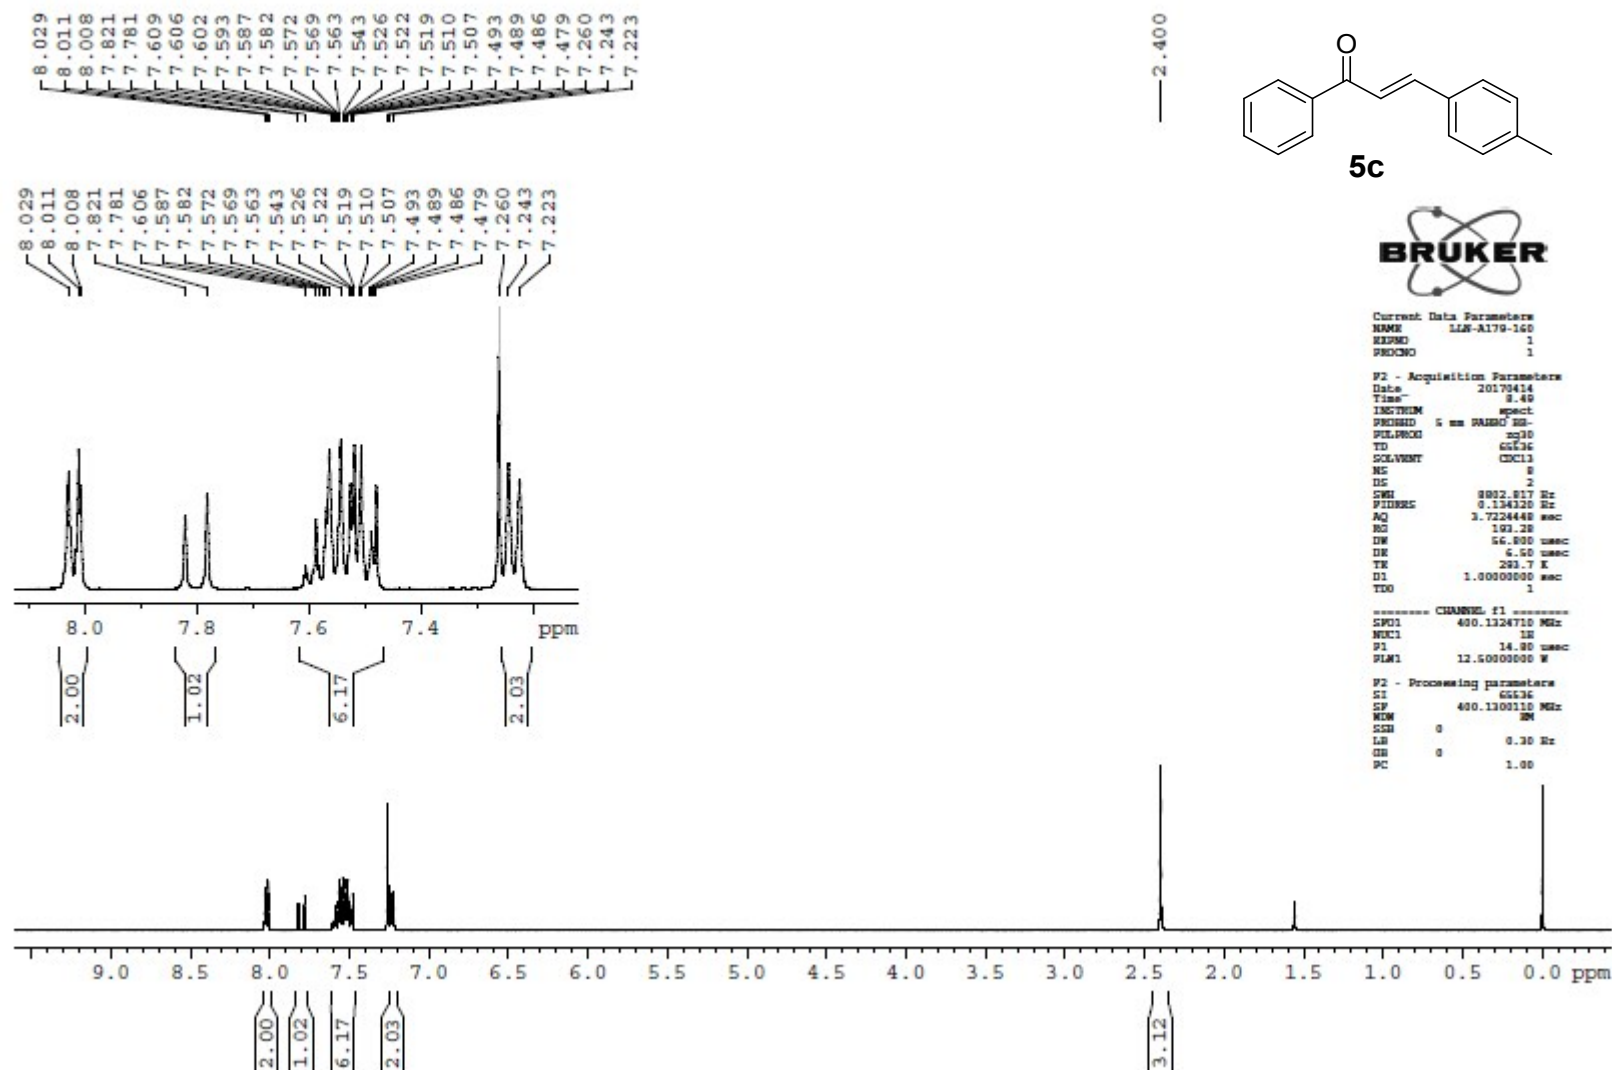

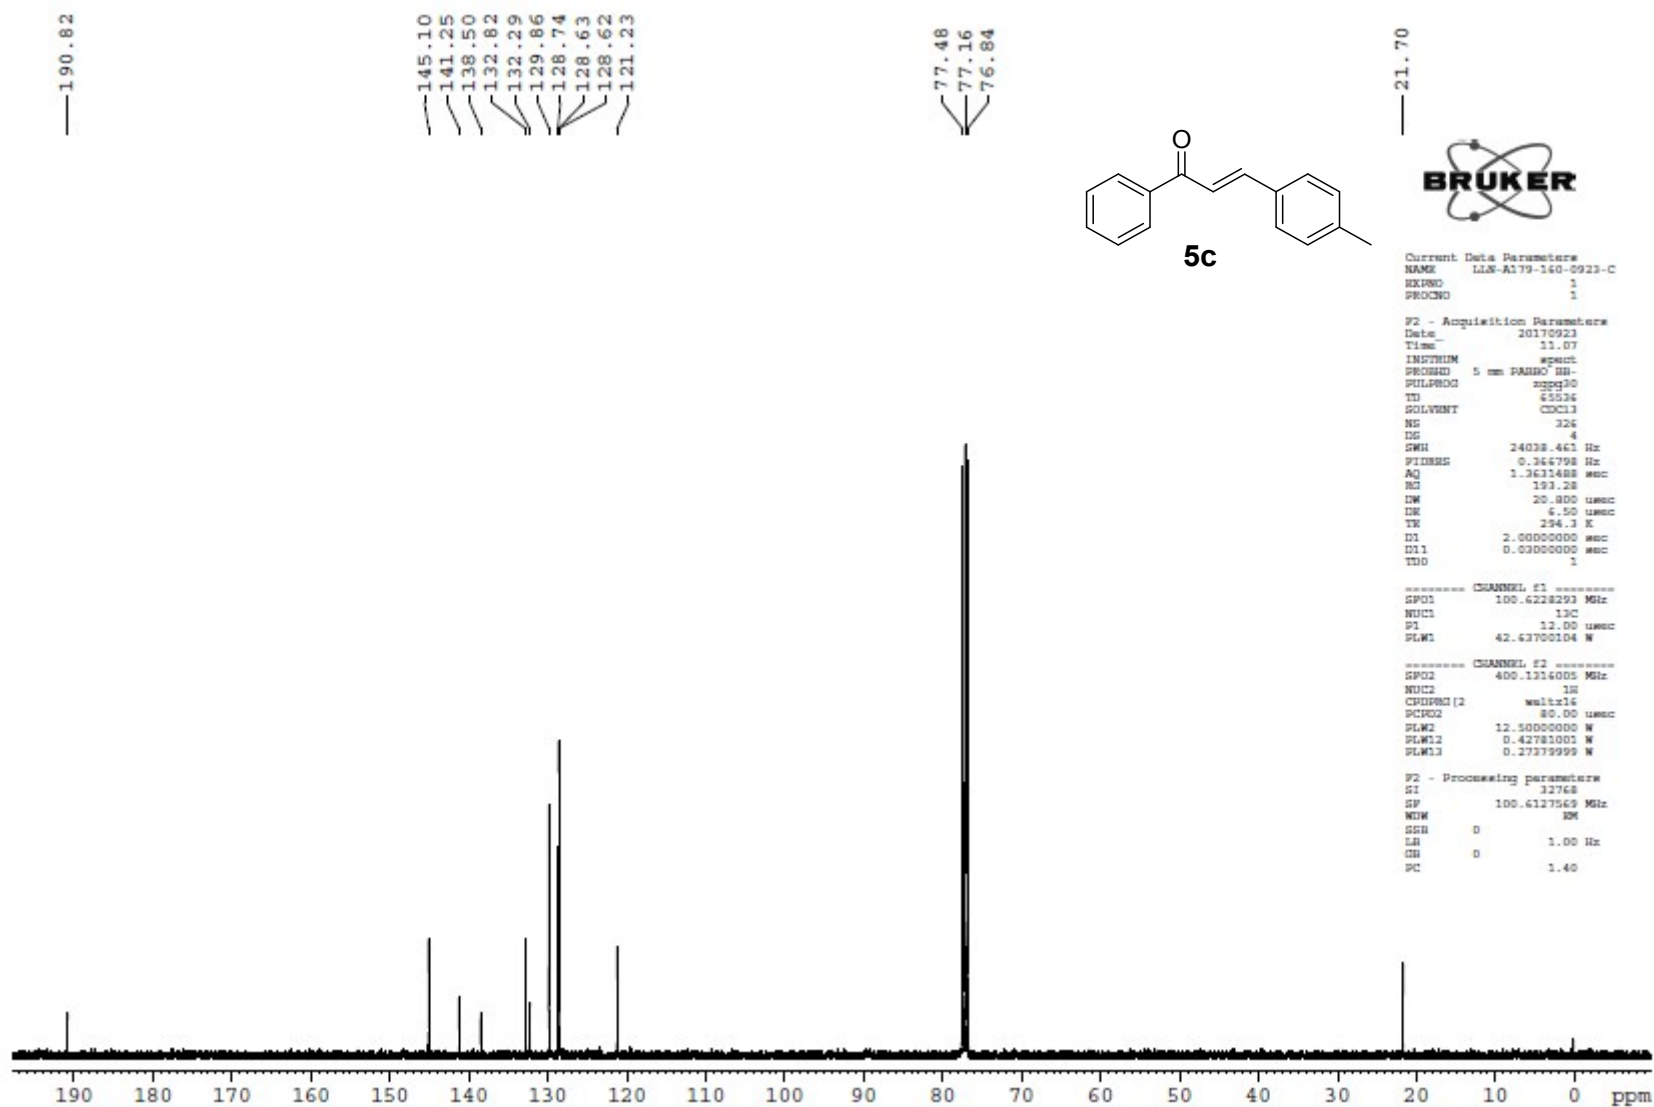

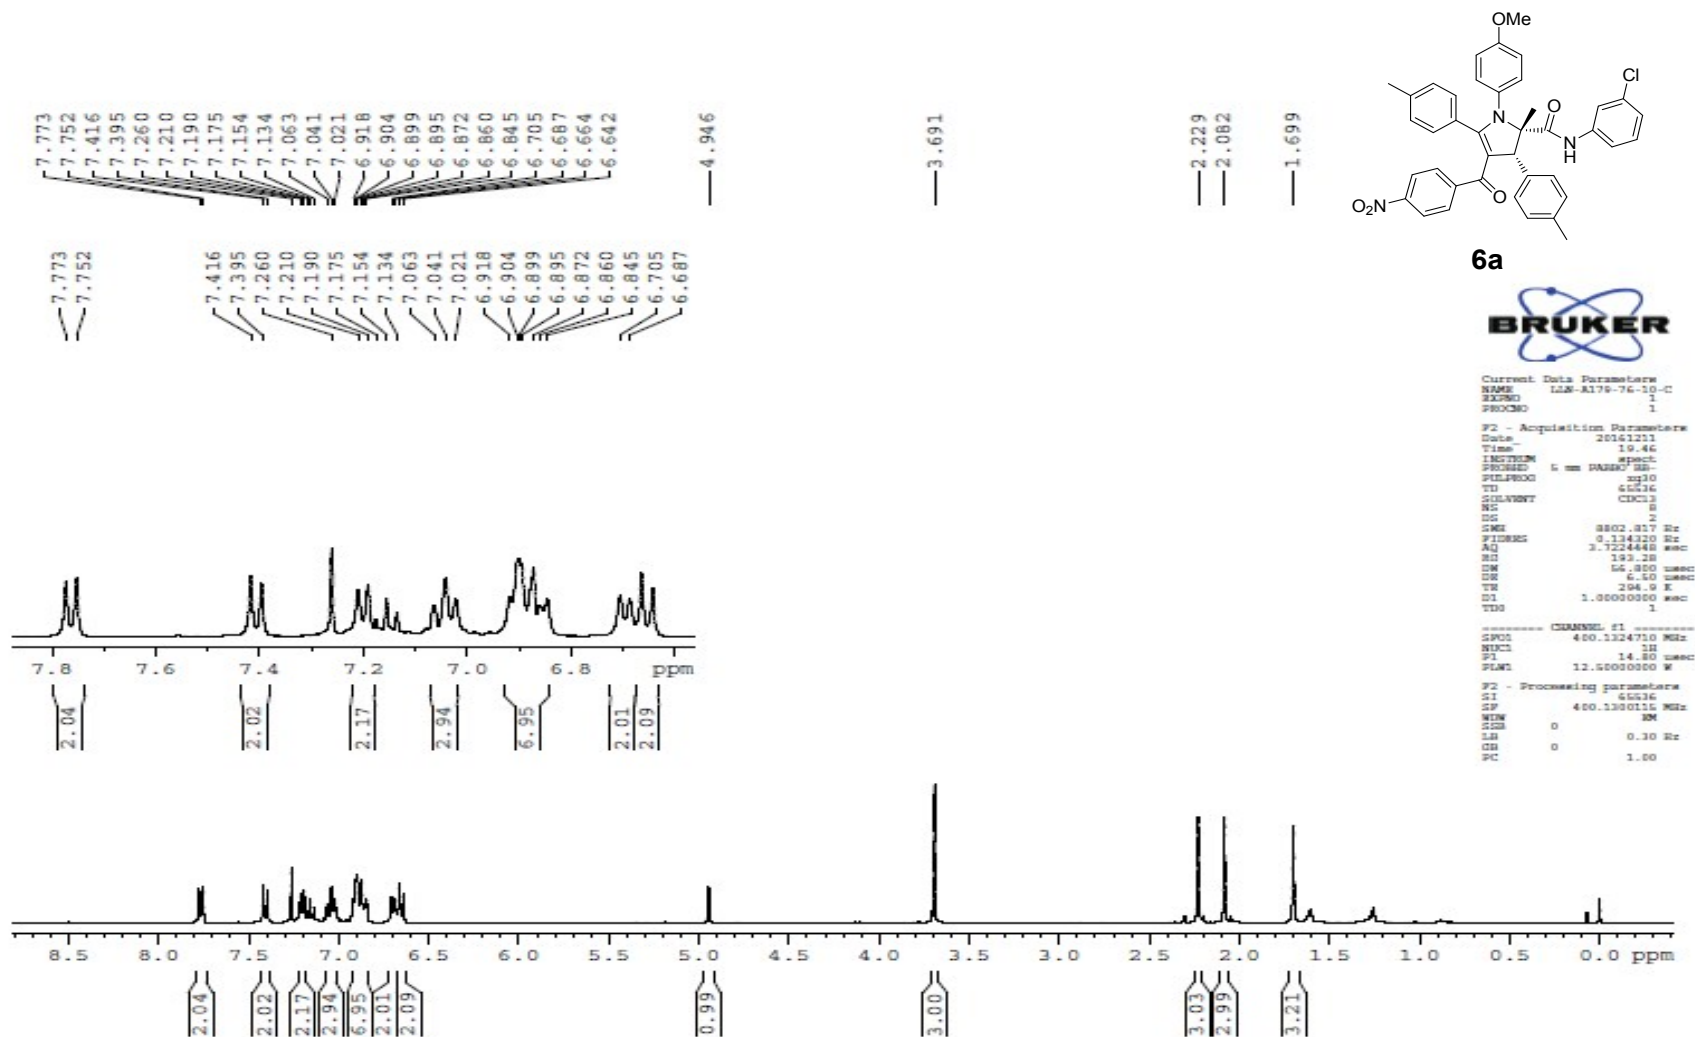



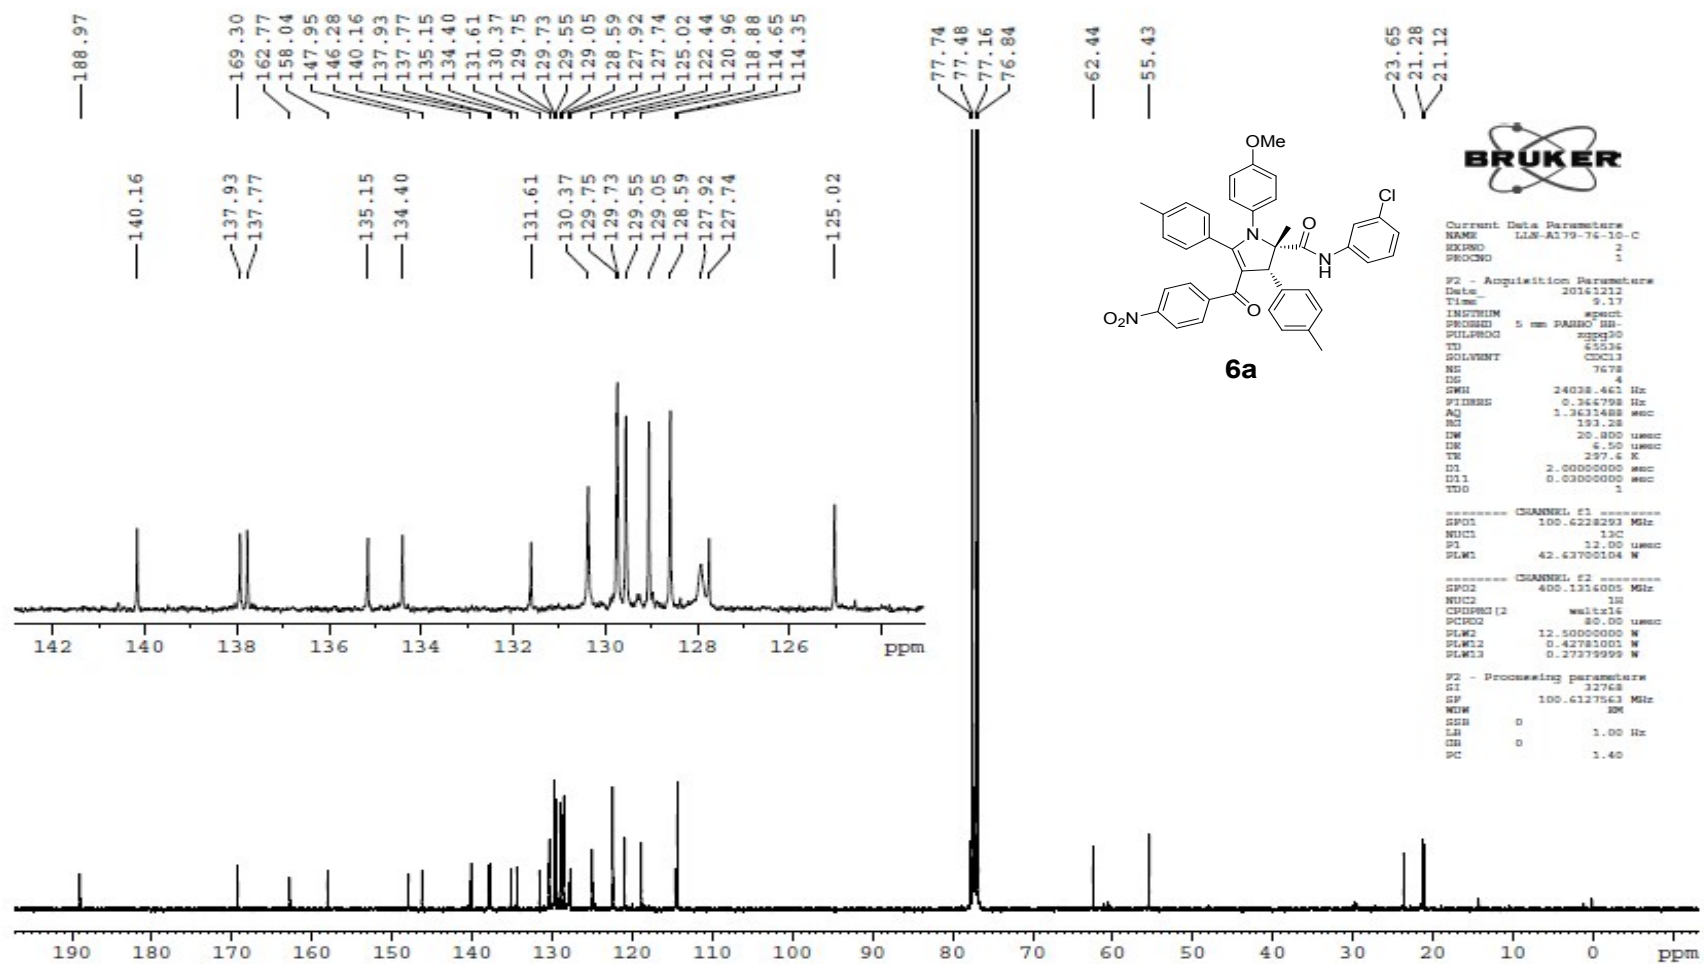

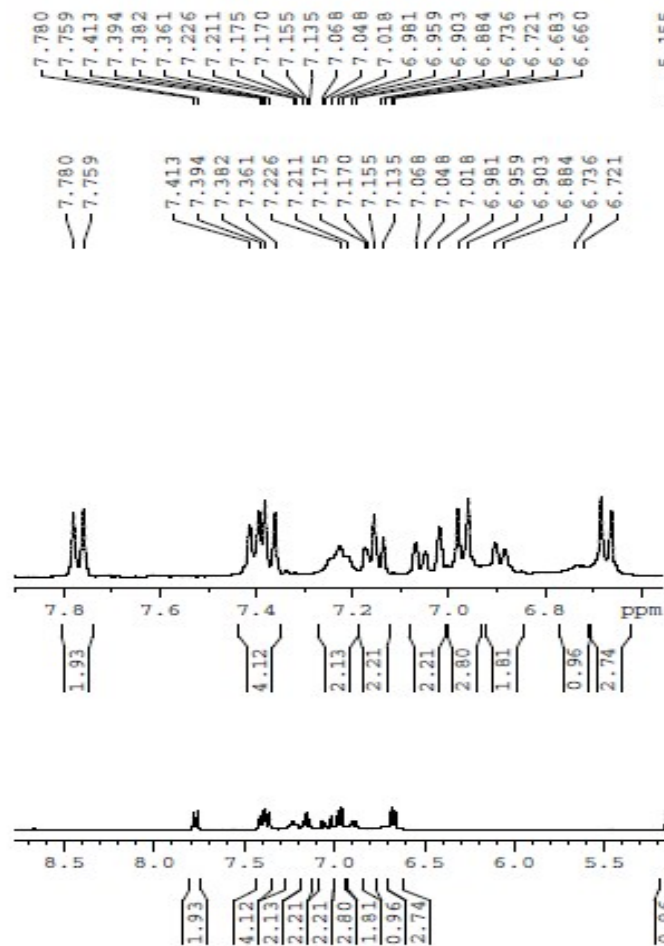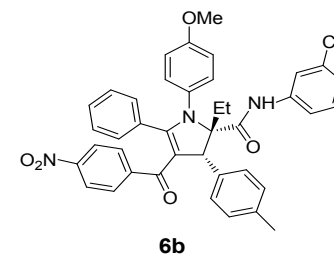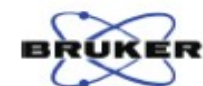

Current Data Parameters  
NAME 128-A155-36-2-0110  
EXPNO 1  
PROCNO 1

F2 - Acquisition Parameters  
Date\_ 20170110  
Time 9.46  
INSTRUM spect  
PROBHD 5 mm BBO-5-1H-1  
PULPROG zg30  
TD 65536  
SOLVENT MeCl  
NS 8  
DS 2  
SFO2 8802.817 Hz  
FIDRES 0.134320 Hz  
AQ 2.1224448 sec  
RG 110.63  
DM 64.800 usec  
DE 6.50 usec  
TE 298.2 K  
D1 1.00000000 sec  
V2 1

===== CHANNEL f1 =====  
NUC1 1H  
P1 14.80 usec  
PLW1 12.50000000 W

F2 - Processing parameters  
SI 65536  
SF 400.1300982 MHz  
WDW EM  
SSB 0  
GB 0 0.30 Hz  
PC 1.00



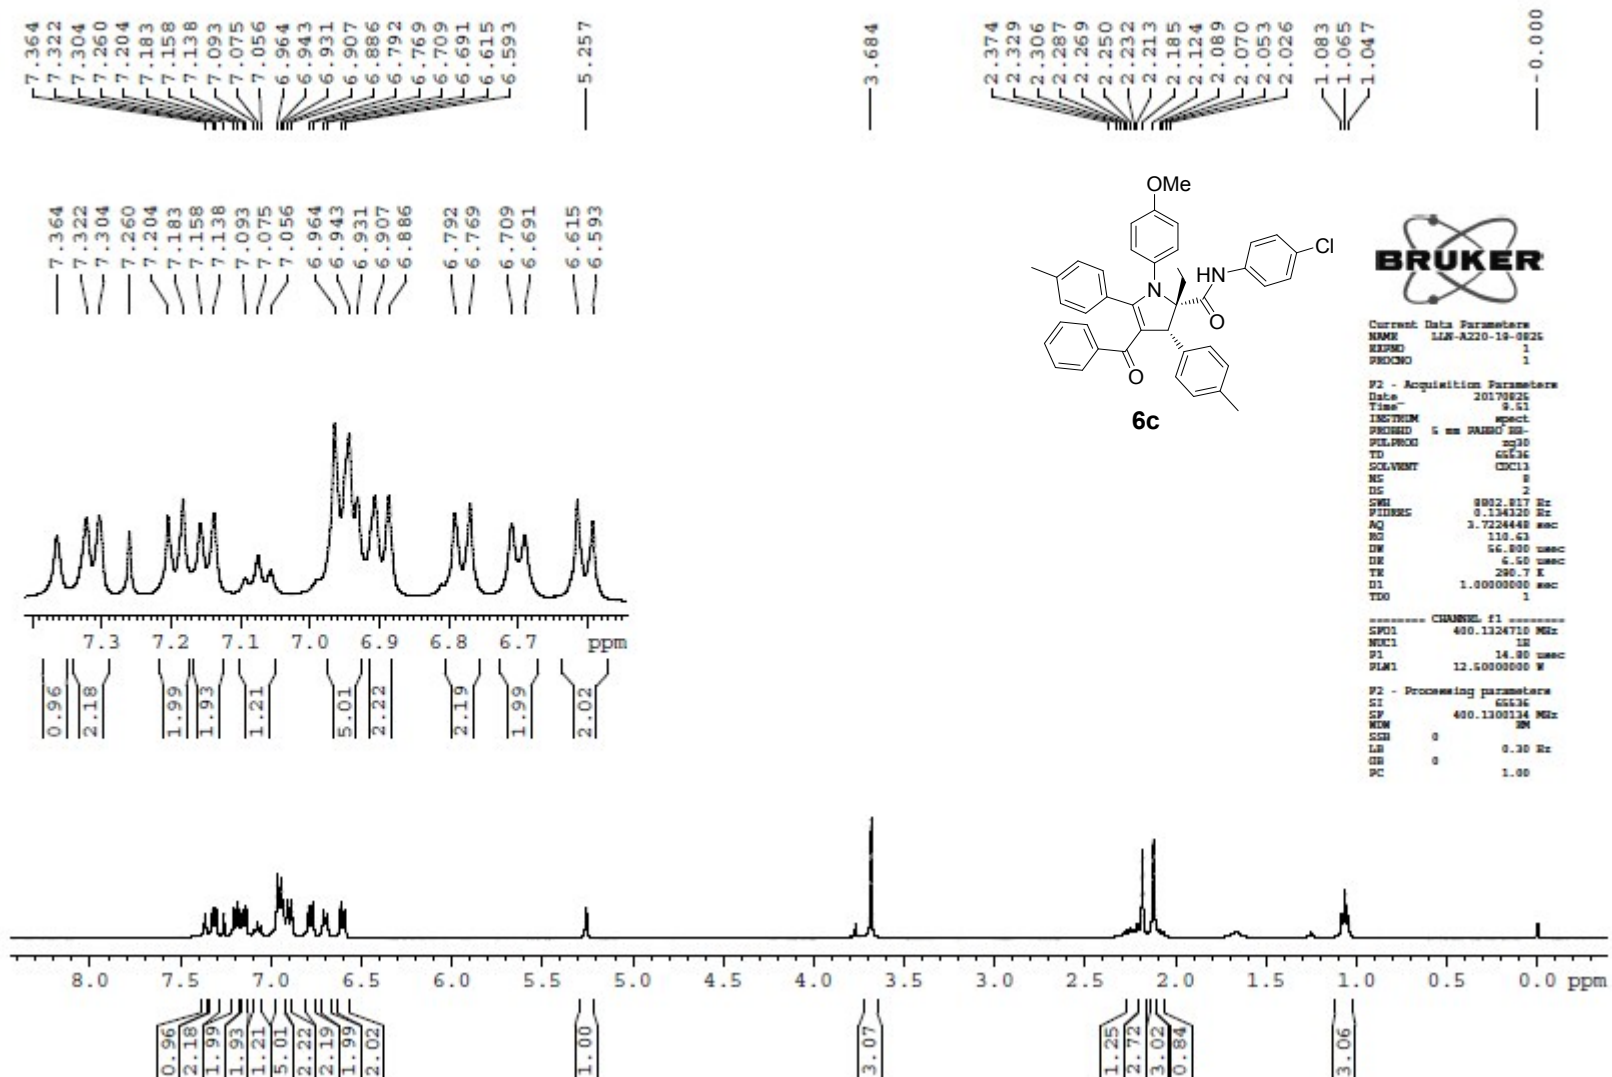

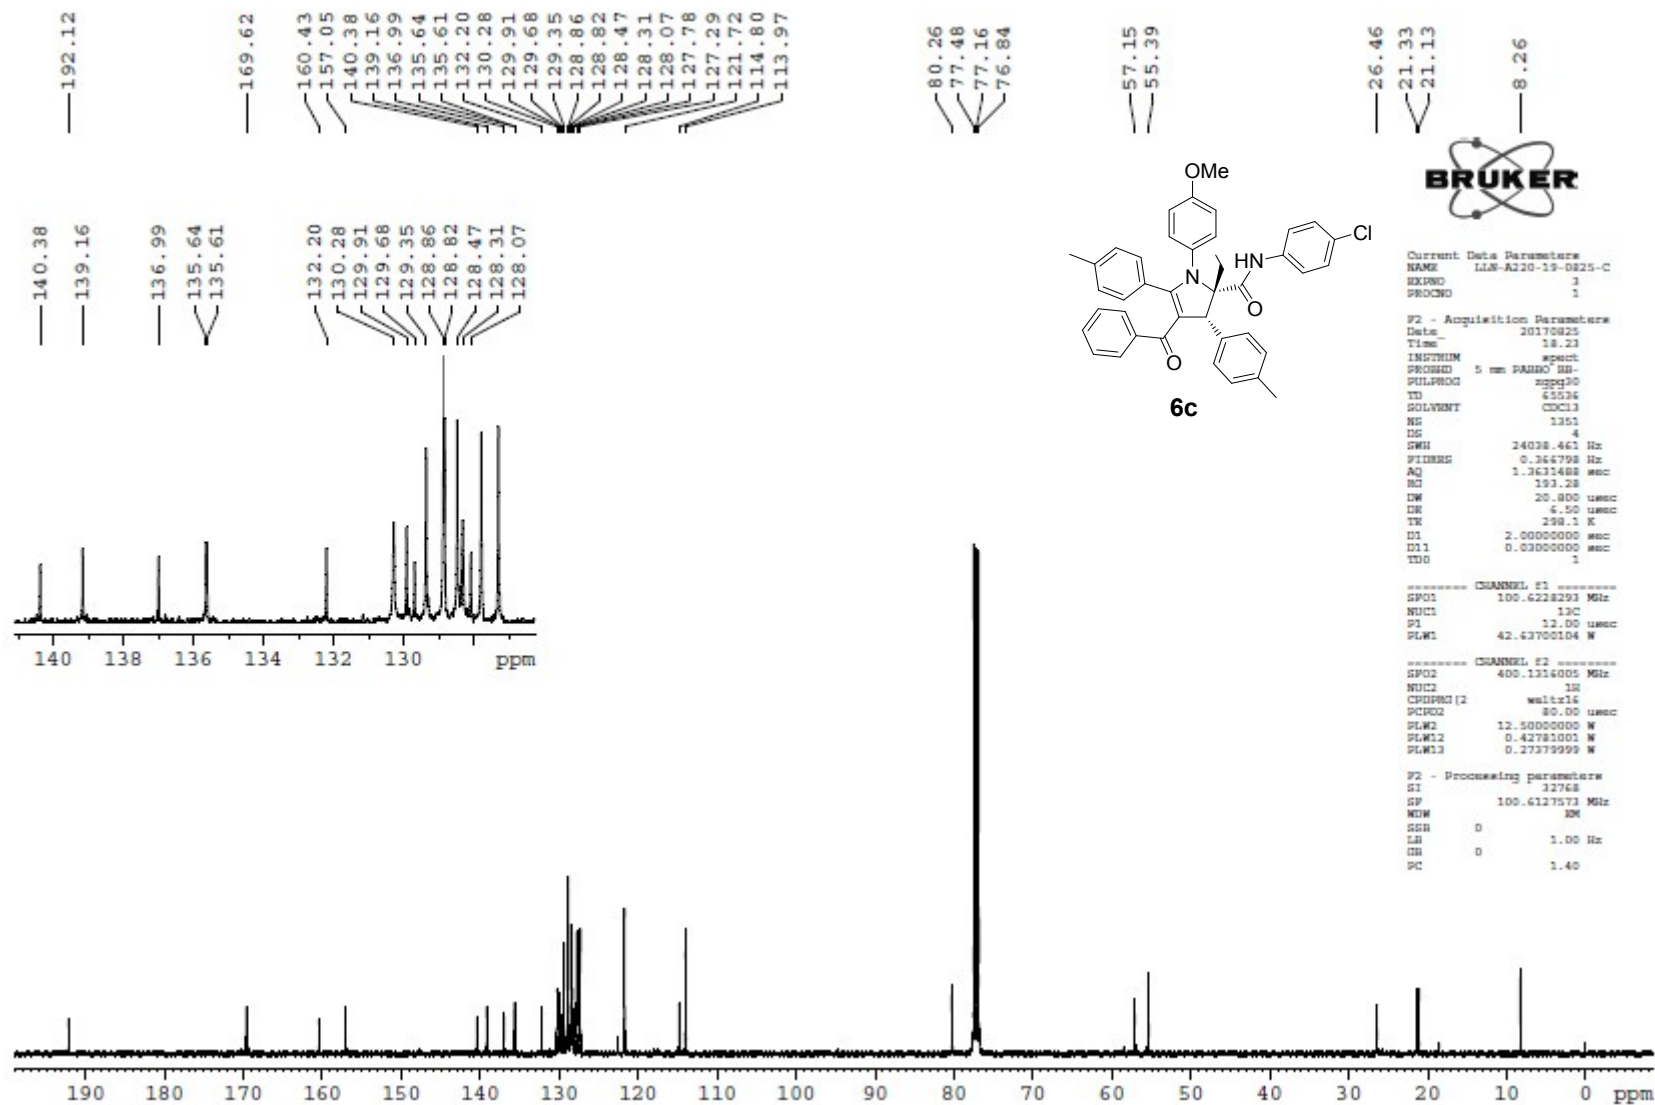

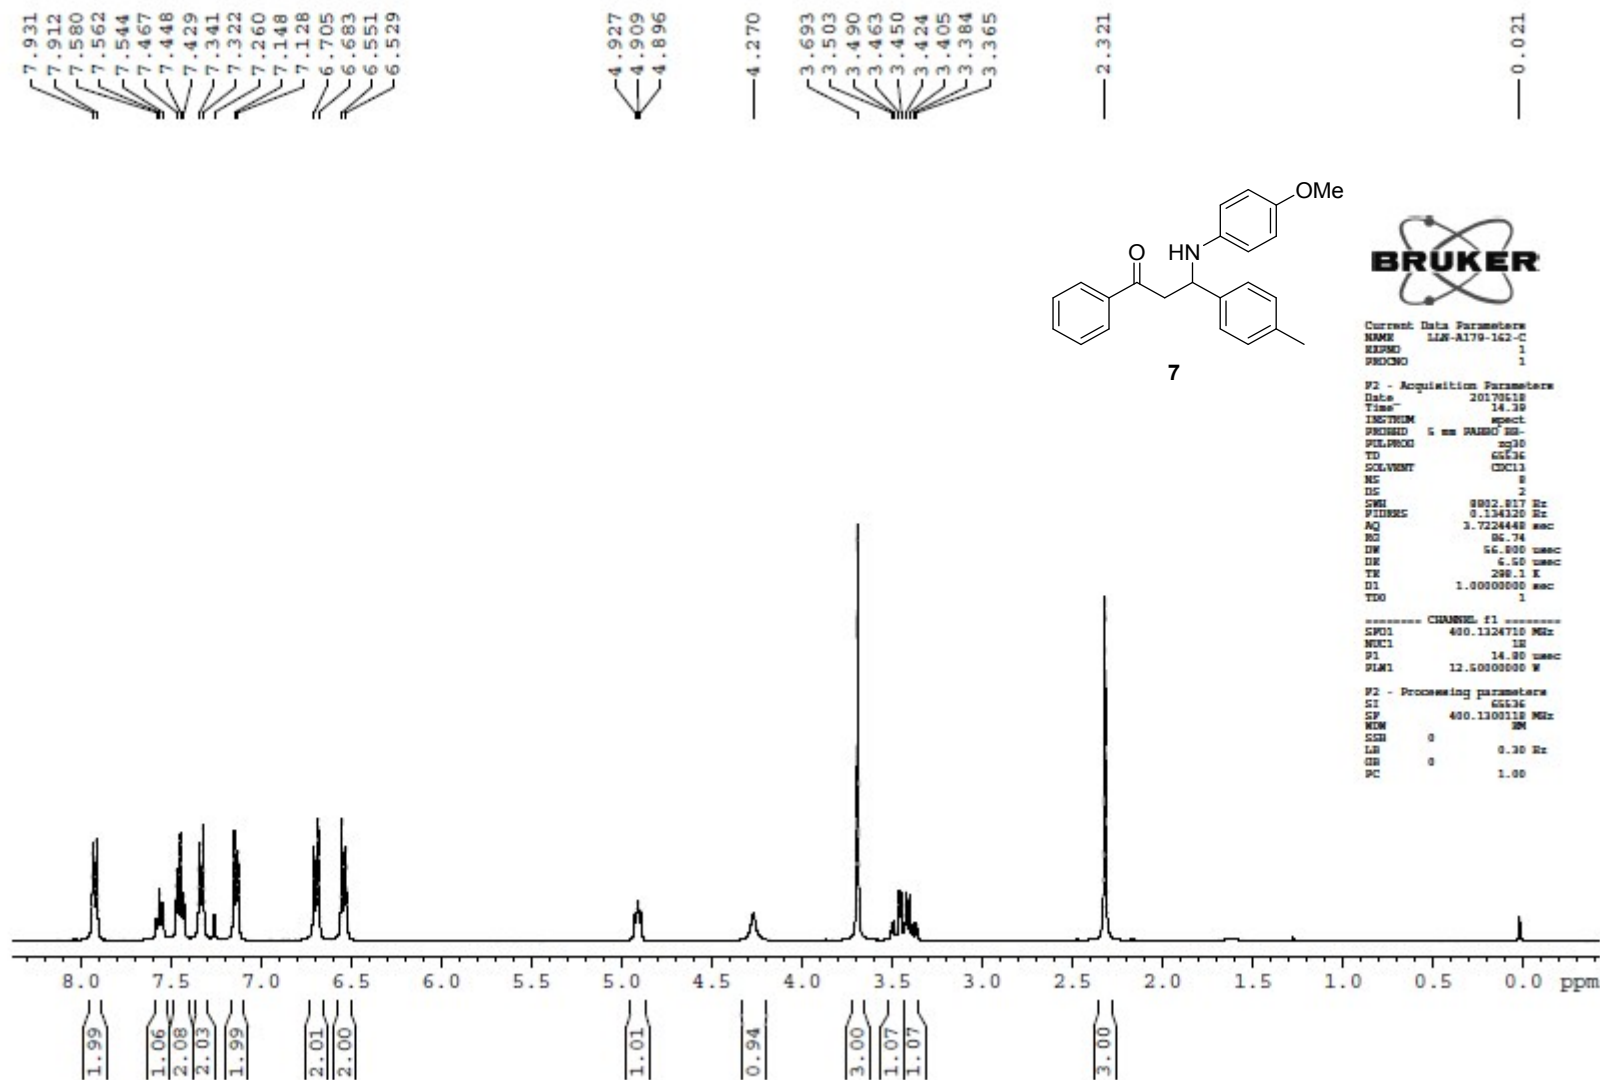



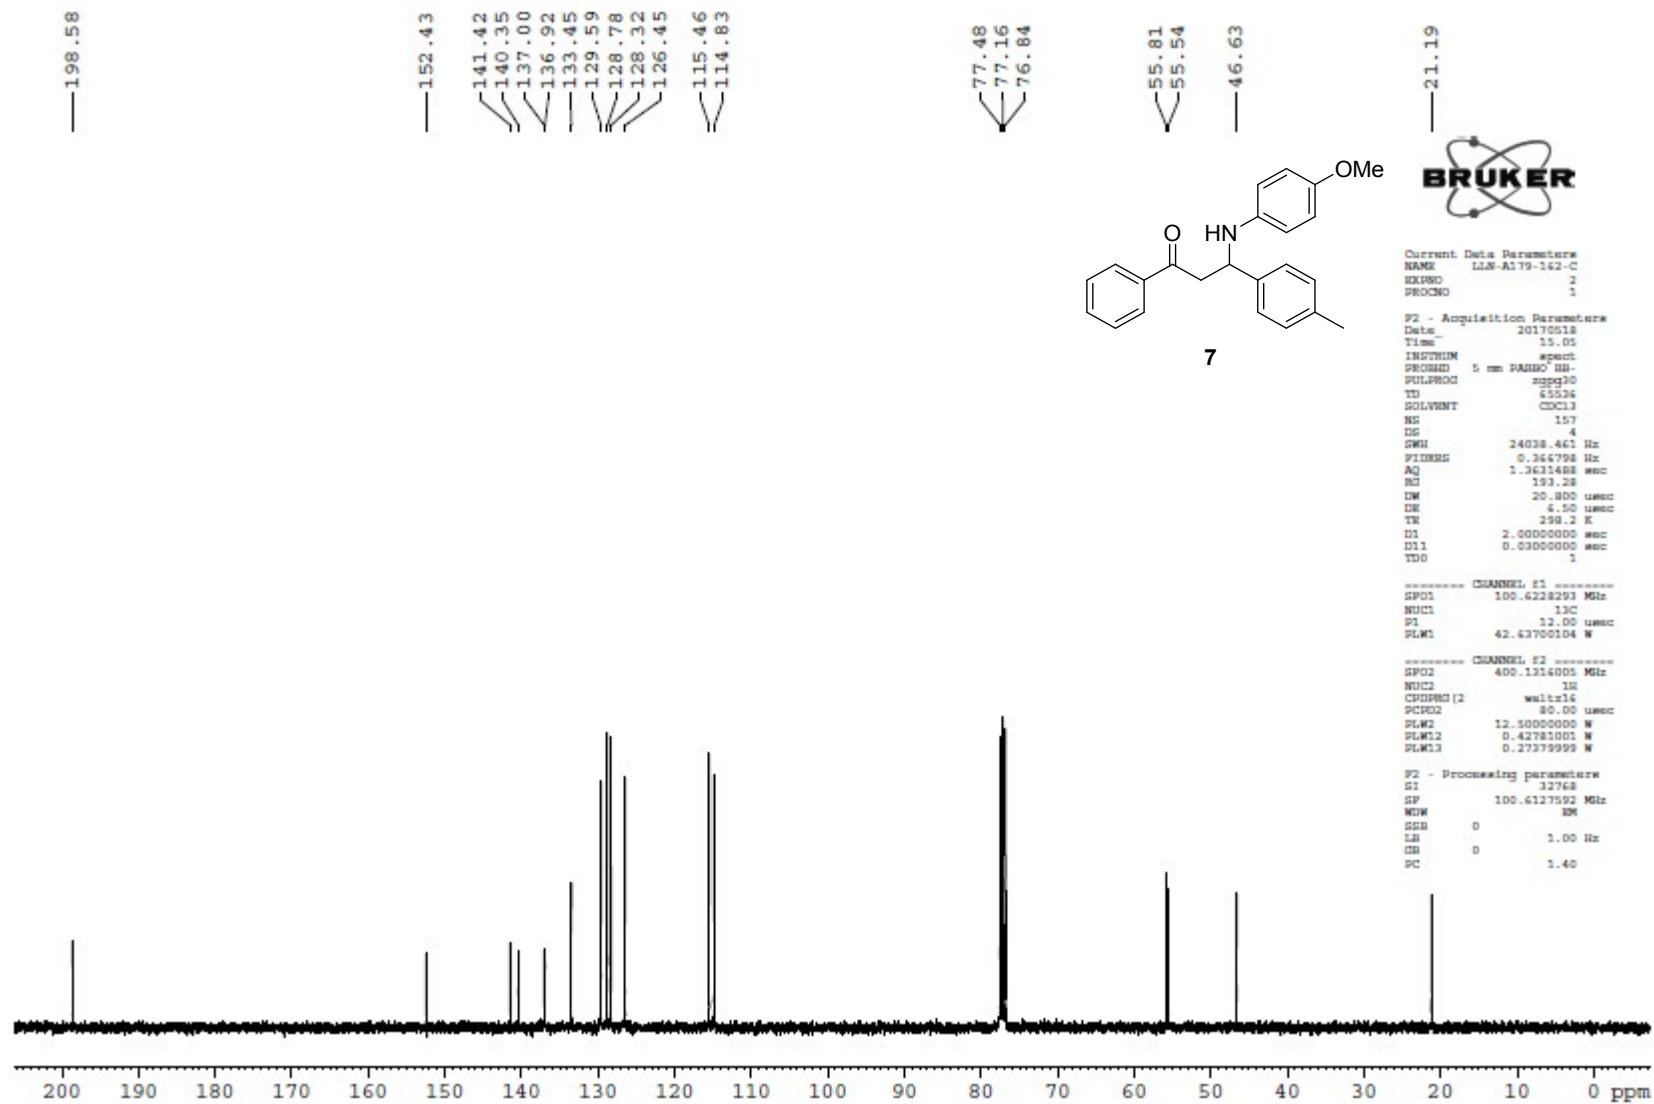

```

Current Data Parameters
NAME      LIA-A179-162-C
EXPNO     2
PROCNO    1

F2 - Acquisition Parameters
Date_     20170518
Time      15.05
INSTRUM   spect
PROBHD    5 mm PABBO HB-
PULPROG   zgpg30
TD        65536
SOLVENT   CDCl3
NS         157
DS         4
SWH        24038.461 Hz
FIDRES     0.364798 Hz
AQ         1.3631488 sec
RG         193.28
DM         20.800 umsec
DE         6.50 umsec
TE         299.2 K
D1         2.0000000 sec
D11        0.0300000 sec
TD0        1

===== CHANNEL f1 =====
SP01      100.6228293 MHz
NUC1       13C
P1         12.00 umsec
PLW1       42.63700104 W

===== CHANNEL f2 =====
SP02      400.1314005 MHz
NUC2       1H
CHRGPG2    waltz16
PCPG2      80.00 umsec
PLW2       12.50000000 W
PLW12      0.42781001 W
PLW13      0.27379999 W

F2 - Processing parameters
SI         32768
SF         100.6127592 MHz
WDW        RM
SSB         0
LB          1.00 Hz
GB          0
PC          1.40

```

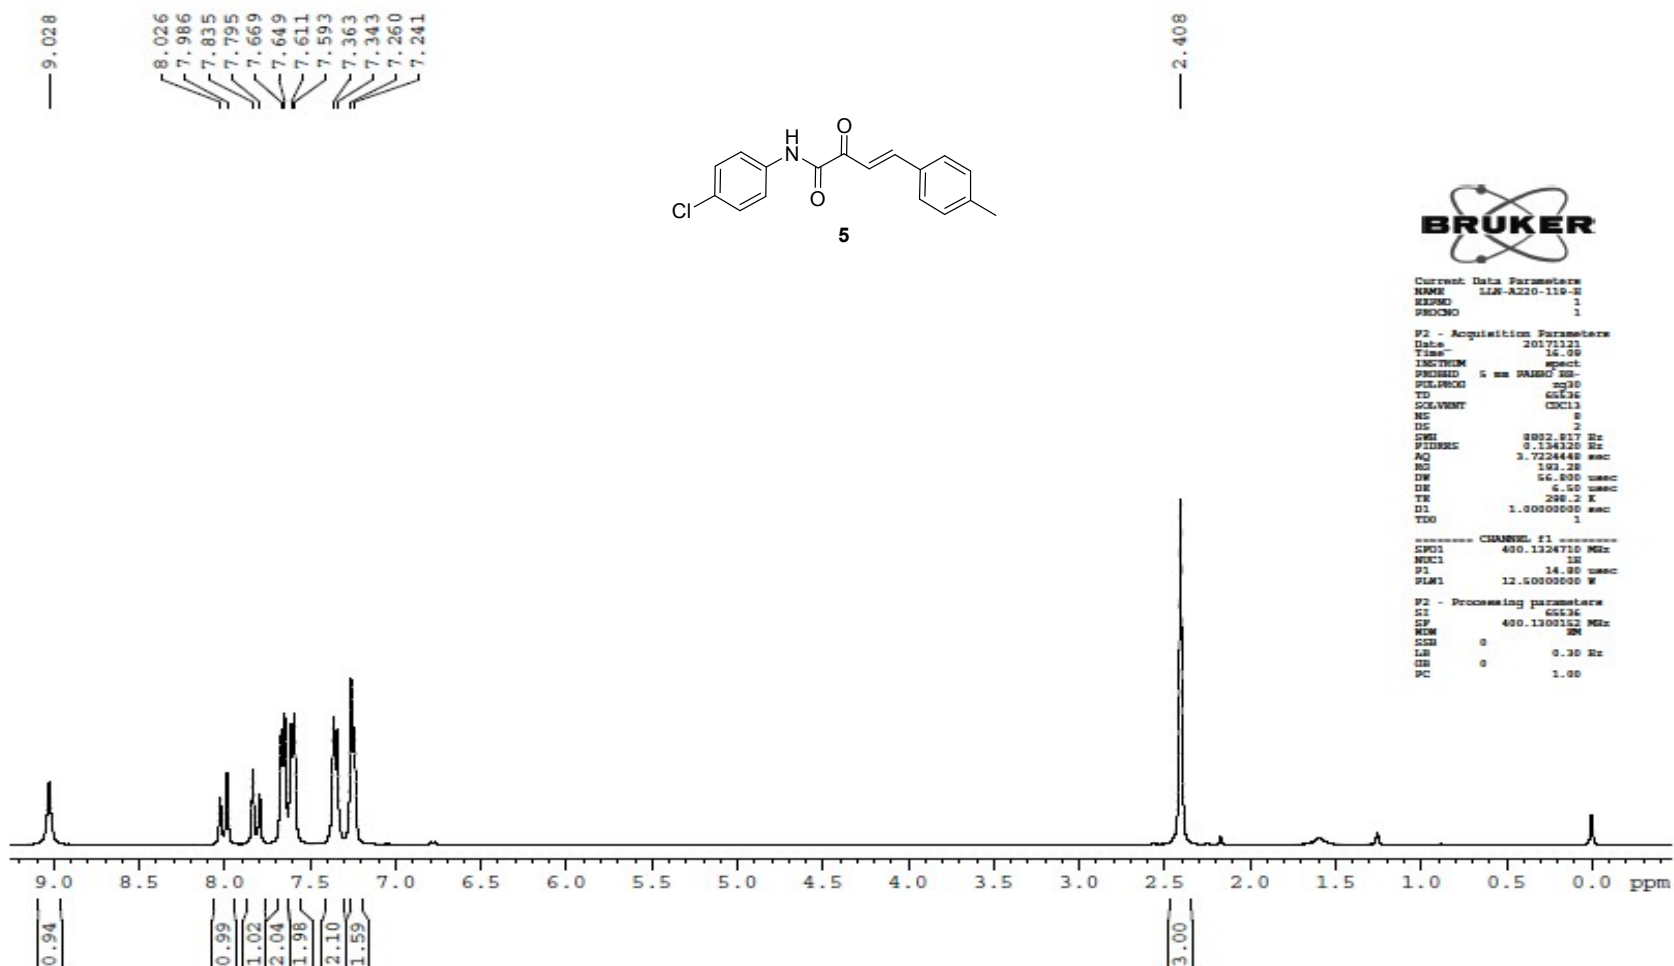



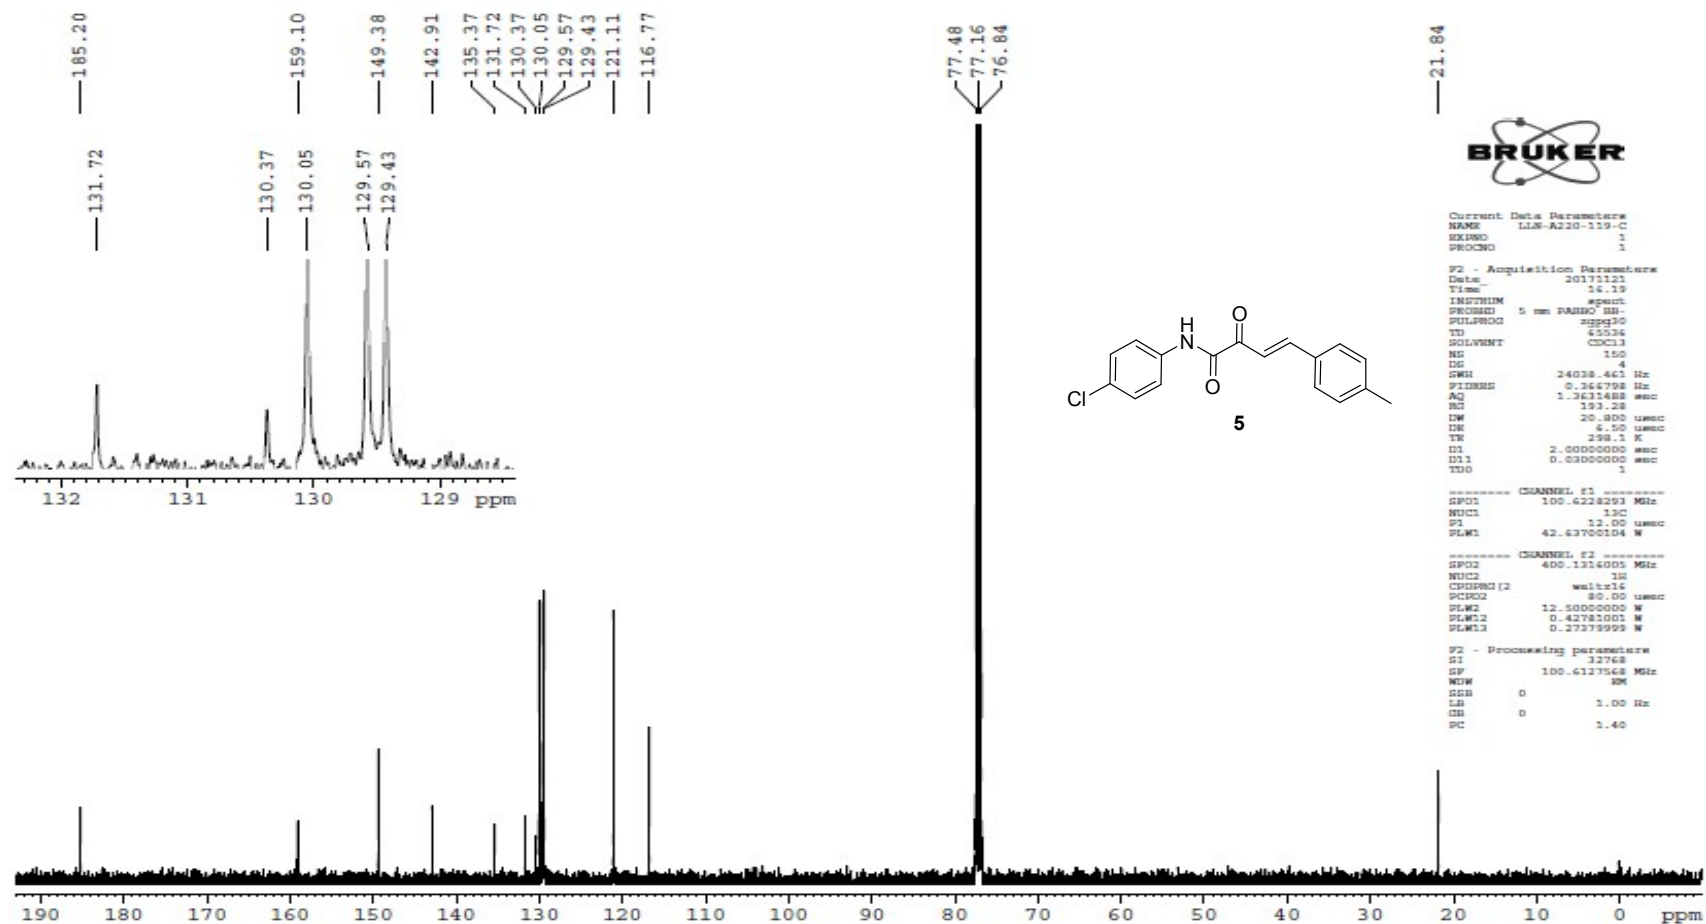

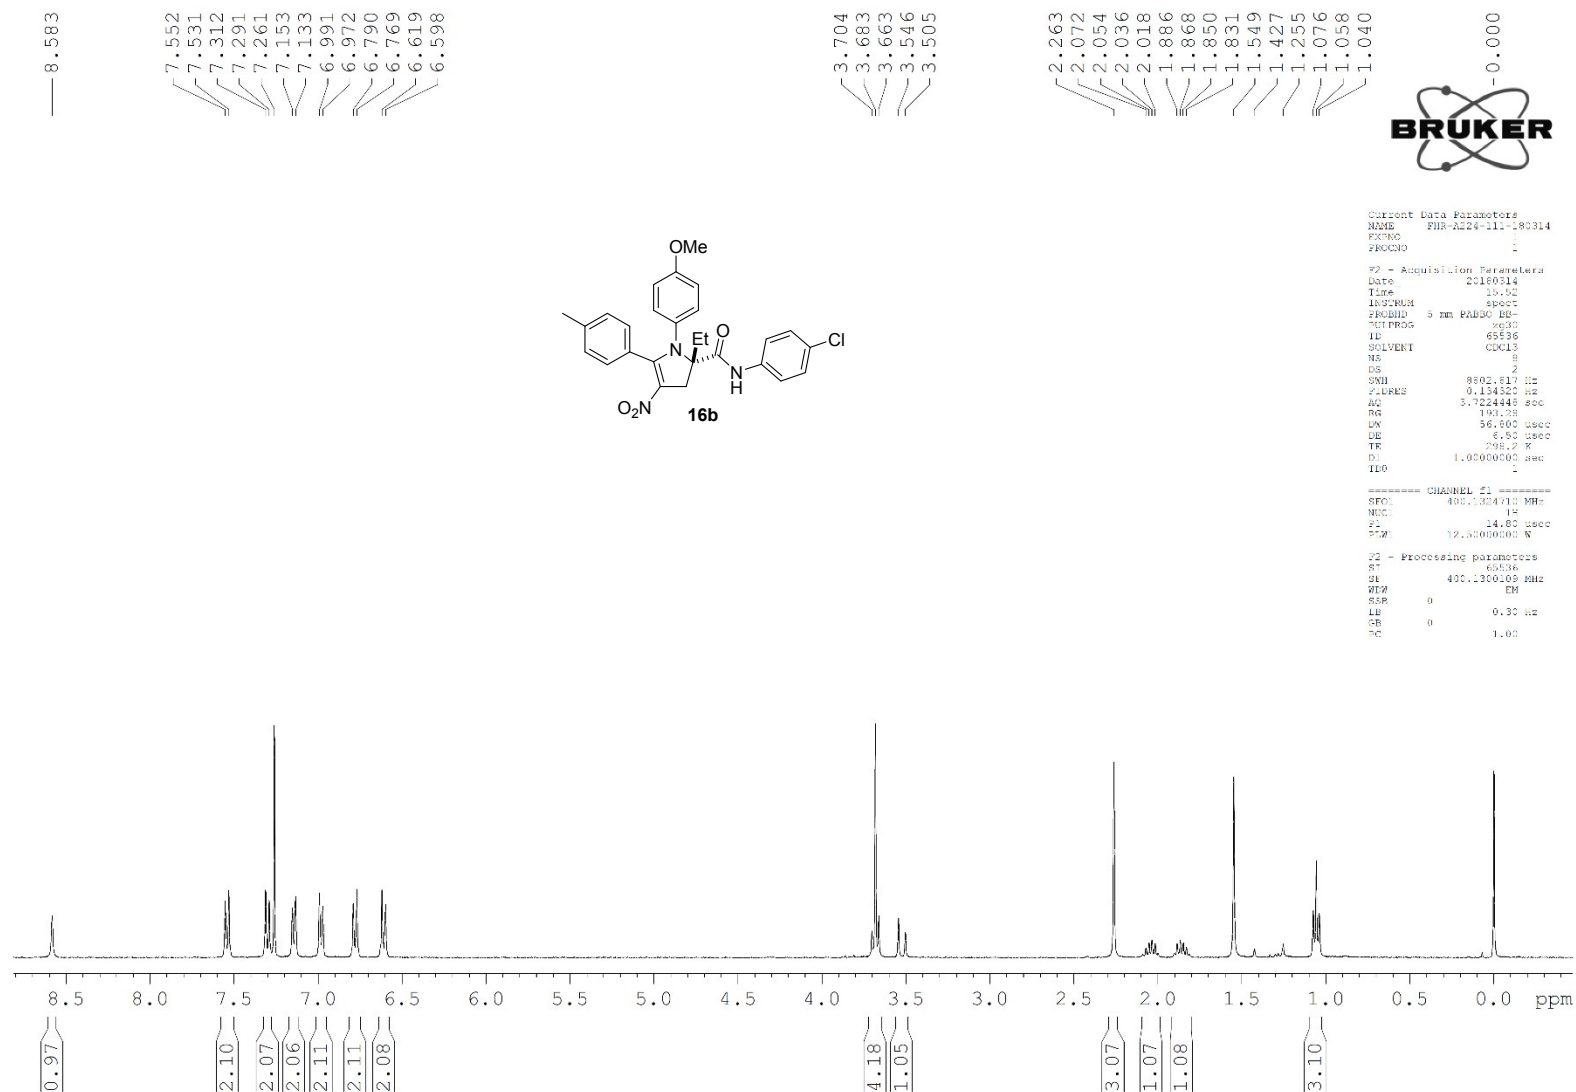

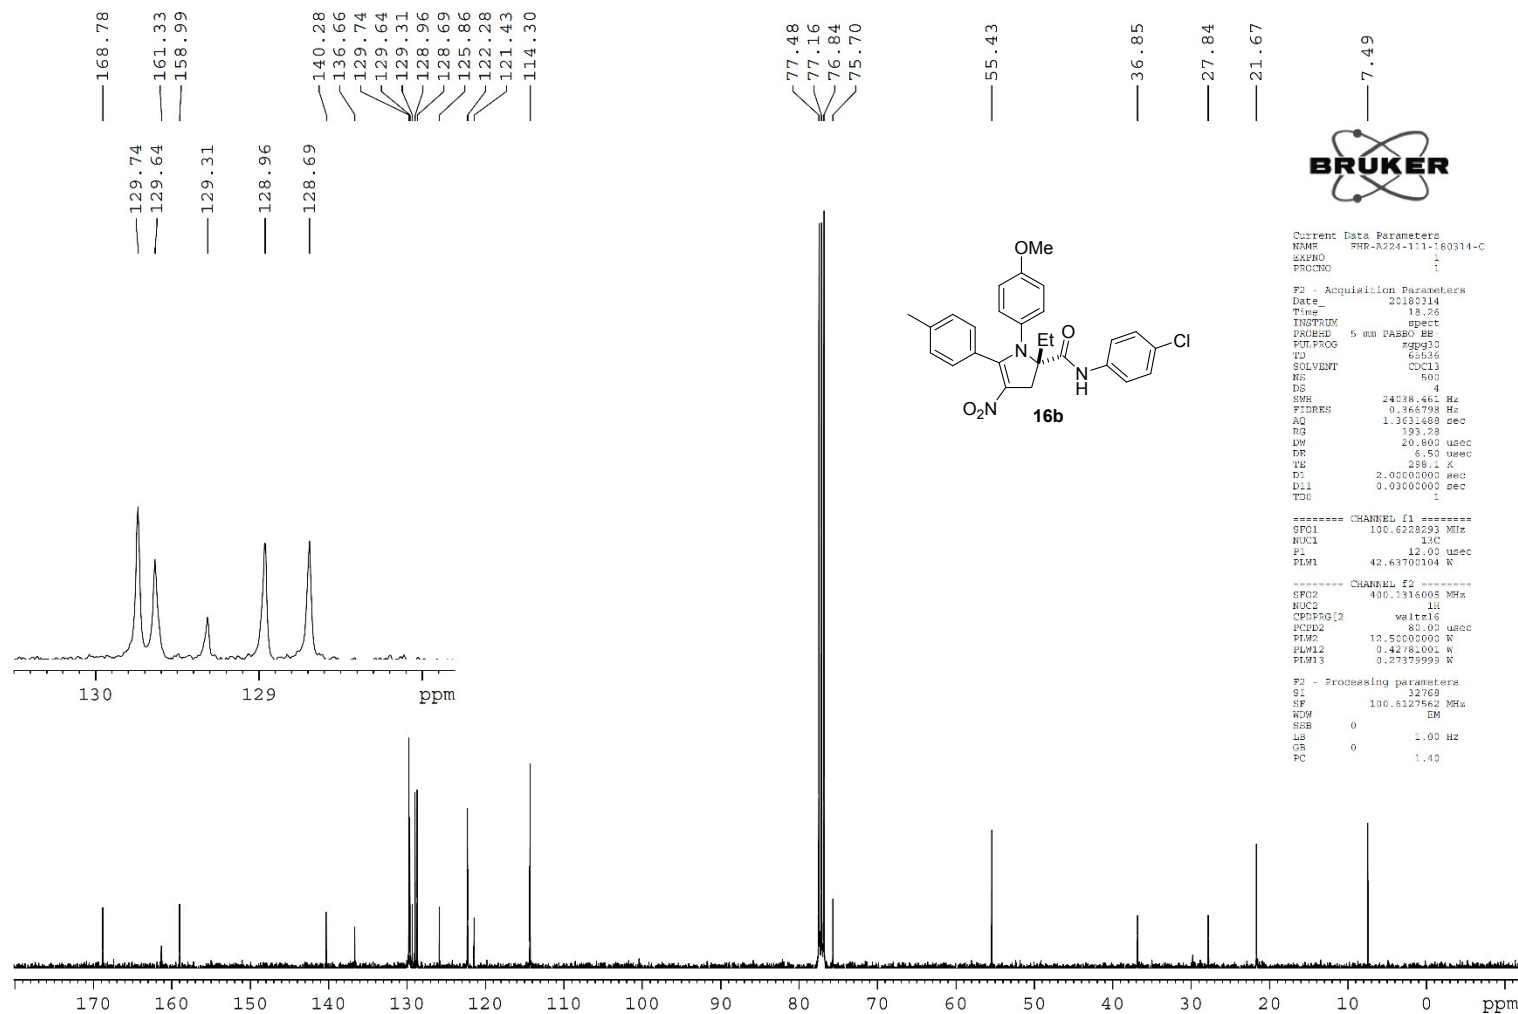

Supplement: c8gc00987b1.pdf [file c8gc00987b1.pdf]
